# Supplementary material for: Nickel-promoted oxidative domino Csp3–H/N–H bond double-isocyanide insertion reaction to construct pyrrolin-2-ones
Source: Royal Society of Chemistry journal article supplement (doi:10.1039/d1ob00139f), 2021-01-01

**Nikel -promoted oxidative domino C<sub>sp3</sub>-H/N-H bond  
double-isocyanide insertion reaction to construct pyrrolin-2-ones**

Li-Rong Wen, Ning-Ning Wang, Wu-Bo Du, Qiang Ma, Lin-Bao Zhang,\* Ming Li\*

State Key Laboratory Base of Eco-Chemical Engineering, College of Chemistry and  
Molecular Engineering, Qingdao University of Science and Technology, Qingdao 266042, P.  
R. China

**Table of Contents**

|                                                                                  |    |
|----------------------------------------------------------------------------------|----|
| 1. Experimental Section.....                                                     | 2  |
| 1.1 General Methods.....                                                         | 2  |
| 1.2 Preparation of Substrate <b>1</b> .....                                      | 2  |
| 1.3 General Procedure For Pyrrolin-2-Ones <b>3</b> .....                         | 3  |
| 1.4 Optimization of Reaction Conditions.....                                     | 4  |
| 1.5 Another Reaction Mechanisms.....                                             | 7  |
| 2. Renferences.....                                                              | 7  |
| 3. X-Ray Crystal Structure of <b>3d</b> .....                                    | 7  |
| 4. <sup>1</sup> H NMR, <sup>13</sup> C NMR and HRMS of <b>3</b> , <b>5</b> ..... | 10 |

## Experimental Section

### 1.1 General Methods

All reagents and solvents were obtained from commercial suppliers and used without further purification unless otherwise specified. 1,4-dioxane was distilled from Na prior to use. All reagents were weighed and handled in air at room temperature. Melting points were recorded on a microscopic melting apparatus and uncorrected.  $^1\text{H}$  NMR and  $^{13}\text{C}$  NMR spectra were recorded at 500 MHz, and 125 MHz in  $\text{CDCl}_3$ . Chemical shifts are reported in  $\delta$  (ppm) relative to TMS. IR spectra were recorded on a FT-IR spectrometer and only major peaks are reported in  $\text{cm}^{-1}$ . HRMS spectra were performed on two different spectrometers with an ESI source. The X-ray single-crystal diffraction was performed on CCD area detector.

### 1.2 Preparation of Substrate 1

#### 1.2.1 Preparation of Cyanoacetamides.

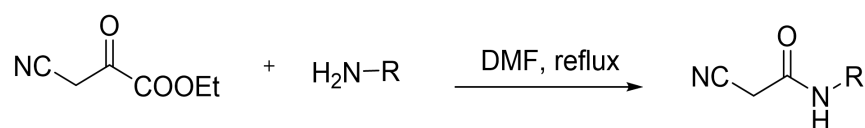

R = Ph, Bn, Cy, *p*- $\text{FC}_6\text{H}_4$ -, *p*- $\text{ClC}_6\text{H}_4$ -, *p*- $\text{BrC}_6\text{H}_4$ -, *p*- $\text{MeOC}_6\text{H}_4$ -, *p*- $\text{MeC}_6\text{H}_4$ -, *m*- $\text{ClC}_6\text{H}_4$ -, *o*- $\text{ClC}_6\text{H}_4$ -, Cyclopropyl, Naphthyl, 2-biphenyl, 1-piperonyl

**Method A**<sup>[1]</sup>. A mixture of amine (10 mmol) and ethyl cyanoacetate (11 mmol, 1.244 g) in DMF (20mL) was refluxed for 5 h and then left to cool to room temperature. The reaction mixture was then poured onto ice-cold water and the precipitated solid was filtered off and recrystallized from ethanol to afford cyanoacetamide.

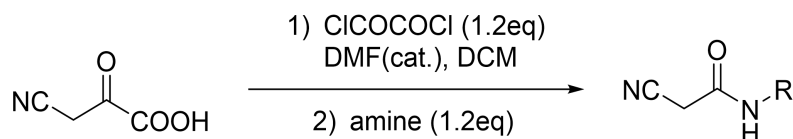

amine = 2-amino-pyridin, 4-(trifluoromethyl)aniline

**Method B**<sup>[2]</sup>. To a dried flask were added acid (10.0mmol, 0.851 g), DCM (20mL), and three drops of DMF sequentially. Then oxalyl chloride (1.2mL, 12.0mmol) was added dropwise within 5 min at 0 °C. The resulting mixture was stirred at room temperature for 3.5 h and then added amine (12 mmol) and water (20 mL). The resulting mixture was stirred for 3h at rt, the completion of the reaction was monitored by TLC. Removal of the solvent in vacuo then ice-cold water was added. Following by a simple filtration and washing procedure with petroleum ether to result in cyanoacetamide.

### 1.2.2 Preparation of $\beta$ -Oxo Amides<sup>[3]</sup>.

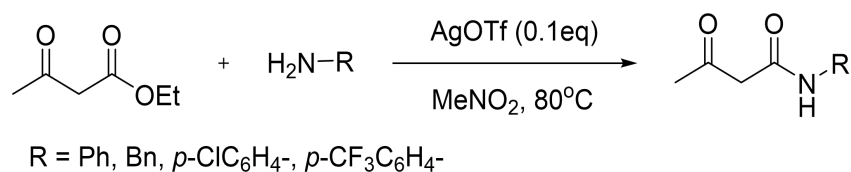

An oven-dried 250 mL round-bottomed flask was charged with ethyl acetoacetate (10 mmol), amine (10 mmol), silver triflate (1.0 mmol, 0.256 g) and nitromethane (50 mL). After stirring at 80 °C for 8 h, the completion of the reaction was monitored by TLC. Removal of the solvent in vacuo and purification of the residue by silica gel column chromatography afforded the desired product.

### 1.3 General Procedure For Pyrrolin-2-Ones (**3**)

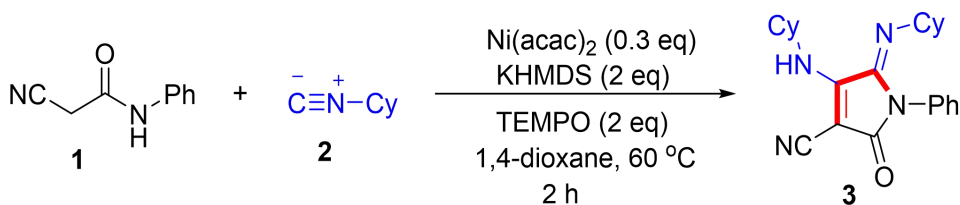

A dried 10 mL round-bottomed flask was charged with cyanoacetamide **1** (42,0 mg, 0.50 mmol), Ni(acac)<sub>2</sub> (38.5 mg, 0.15 mmol), TEMPO (156.3 mg, 1.0 mmol), isocyanocyclohexane **2** (136.5 mg, 1.25 mmol), 1,4-dioxane (1 mL) and KHMDS (1.0 mol/L in THF, 1 mL, 1.0 mmol). The reaction mixture was stirred at 60 °C in air for 2h. After completion of the reaction as monitored by TLC. Removal of the solvent in vacuo and purification of the residue by silica gel column chromatography(petroleum ether/EtOAc, 15:1 then 4:1, v/v), then washing with petroleum ether afforded the desired product.

## 1.4 Optimization of Reaction Conditions

### Oxidant<sup>a</sup>

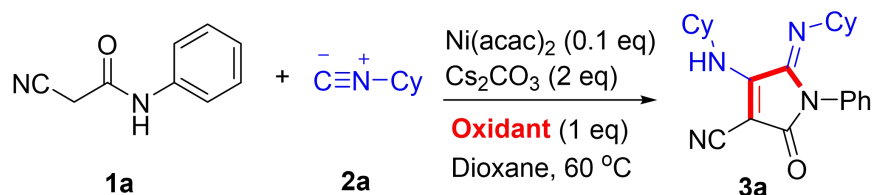

| Entry | Oxidant                       | Time (h) | % yield 3aa |
|-------|-------------------------------|----------|-------------|
| 1     | air                           | 12       | 46          |
| 2     | O <sub>2</sub>                | 7        | 38          |
| 3     | CuCl <sub>2</sub>             | 12       | trace       |
| 4     | DCP                           | 12       | 41          |
| 5     | DTPB                          | 5        | 46          |
| 6     | oxone                         | 12       | 31          |
| 7     | H <sub>2</sub> O <sub>2</sub> | 12       | 42          |
| 8     | TBHP                          | 12       | 40          |
| 9     | <b>TEMPO</b>                  | <b>4</b> | <b>51</b>   |

<sup>a</sup>Conditions: 0.6 mmol of **1a**, 1.5 mmol of **2a**, 10 mol% of Ni(acac)<sub>2</sub>, 1.2 mmol of Cs<sub>2</sub>CO<sub>3</sub>, Dioxane (1.2 mL), air, 60°C.

### Metal catalyst<sup>a</sup>

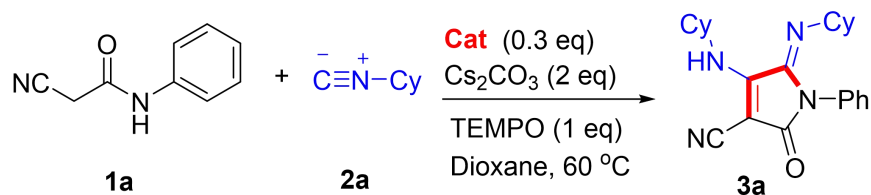

| Entry | Cat                                           | Time (h)   | Yield (%) |
|-------|-----------------------------------------------|------------|-----------|
| 1     | —                                             | 12         | N.R.      |
| 2     | (Cp* <i>Rh</i> Cl <sub>2</sub> ) <sub>2</sub> | 12         | N.P.      |
| 3     | Pd(OAc) <sub>2</sub>                          | 3.5        | 19        |
| 4     | Pd(PPh) <sub>2</sub> Cl <sub>2</sub>          | 3.5        | 21        |
| 5     | Co(acac) <sub>2</sub>                         | 3.5        | 7         |
| 6     | Co(acac) <sub>3</sub>                         | 3.5        | 20        |
| 7     | <b>Ni(acac)<sub>2</sub></b>                   | <b>3.5</b> | <b>34</b> |
| 8     | Ni(PPh) <sub>2</sub> Cl <sub>2</sub>          | 3.5        | 9         |
| 9     | NiCl <sub>2</sub> 6H <sub>2</sub> O           | 3.5        | 21        |
| 10    | Ni(OAc) <sub>2</sub> 4H <sub>2</sub> O        | 3.5        | 15        |
| 11    | Ni(COD) <sub>2</sub>                          | 12         | trace     |

<sup>a</sup>Conditions: 0.6 mmol of **1a**, 1.5 mmol of **2a**, 1.2 mmol of Cs<sub>2</sub>CO<sub>3</sub>, 0.6 mmol of TEMPO, air, Dioxane (1.2 mL), air, 60°C. N. P = no product.

### Base<sup>a</sup>

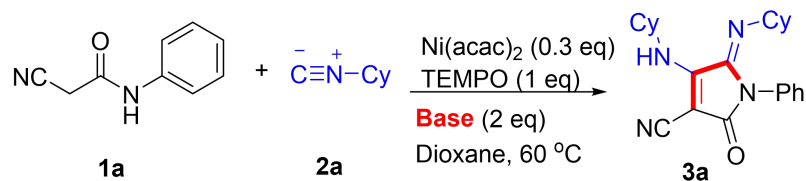

| Entry    | Base                            | Time (h) | Yield(%)  |
|----------|---------------------------------|----------|-----------|
| 1        | Cs <sub>2</sub> CO <sub>3</sub> | 2.5      | 44        |
| 2        | NaOH                            | 3.5      | 58        |
| 3        | LiOH                            | 3.5      | 62        |
| 4        | NaH                             | 5        | 65        |
| 5        | CaH                             | 12       | trace     |
| 6        | <i>t</i> -BuOLi                 | 3        | 49        |
| 7        | <i>t</i> -BuONa                 | 6        | 43        |
| 8        | <i>t</i> -BuOK                  | 6        | 37        |
| <b>9</b> | <b>KHMDS</b>                    | <b>2</b> | <b>84</b> |

<sup>a</sup>Conditions: 0.6 mmol of **1a**, 1.5 mmol of **2a**, 30 mol% of Ni(acac)<sub>2</sub>, 0.6 mmol of TEMPO, air, Dioxane (1.2 mL), air, 60°C.

### Solvent<sup>a</sup>

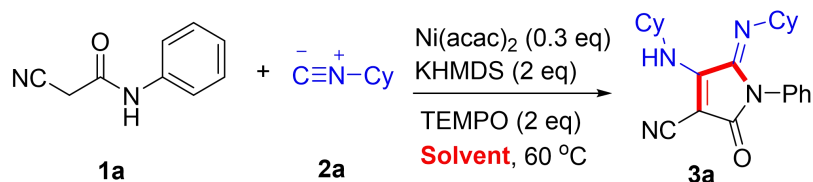

| Entry    | Solvent            | Time (h) | Yield(%)  |
|----------|--------------------|----------|-----------|
| 1        | toluene            | 4.5      | 39        |
| 2        | fluorobenzene      | 8        | 61        |
| 3        | chlorobenzene      | 7        | 70        |
| 4        | DCE                | 11       | 21        |
| 5        | CH <sub>3</sub> CN | 1.5      | 52        |
| <b>6</b> | <b>1,4-dioxane</b> | <b>2</b> | <b>84</b> |
| 7        | THF                | 3        | 68        |
| 8        | 2-Me-THF           | 4        | 44        |

<sup>a</sup>Conditions: 0.6 mmol of **1a**, 1.5 mmol of **2a**, 30 mol% of Ni(acac)<sub>2</sub>, 0.6 mmol of TEMPO, air, 1.2 mmol of KHMDS, air, 60°C.

## Temperature

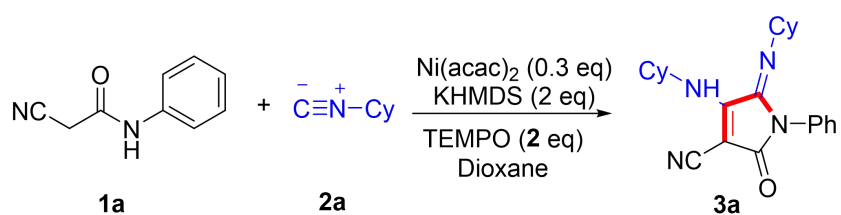

| Entry    | Temp. (°C) | Time (h) | Yield (%) |
|----------|------------|----------|-----------|
| 1        | 25         | 24       | 47        |
| 2        | 40         | 8        | 70        |
| <b>3</b> | <b>60</b>  | <b>2</b> | <b>84</b> |
| 4        | 80         | 1        | 60        |

<sup>a</sup>Conditions: 0.6 mmol of **1a**, 1.5 mmol of **2a**, 30 mol% of  $\text{Ni}(\text{acac})_2$ , 0.6 mmol of TEMPO, air, 1.2 mmol of KHMDS, Dioxane (1.2 mL).

## Ineffectual Isocyanides

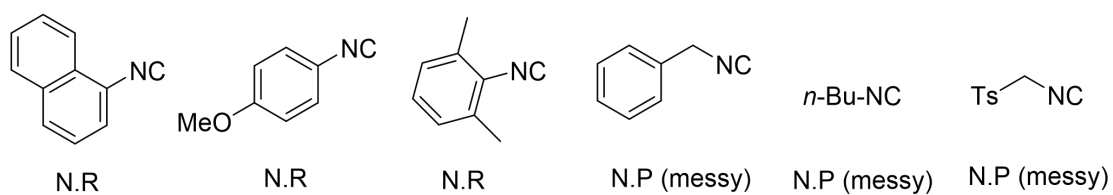

N.R = no reaction; N.P = no product

## 1.5 Another Reaction Mechanism

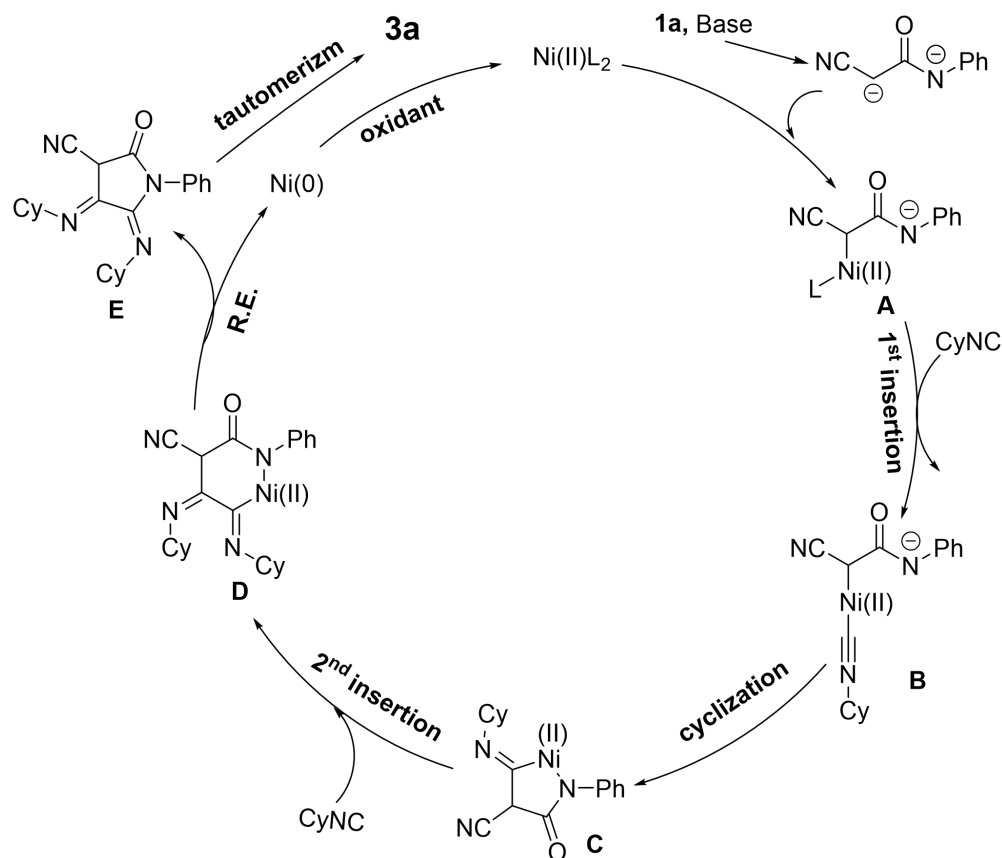

## 2. References

- (1) Li, Z.; Zhu, A.; Yang, J. *J. Heterocycl. Chem.* 2012, 49, 1458.
- (2) Fisher, L. E.; Caroon, J. M.; Stabler, S. R.; Lundberg, S.; Muchowski, J. M. *J. Org. Chem.* 1993, 58, 3643.
- (3) Vandavasi, J. K.; Hsiao, C. T.; Hu, W. P.; Boominathan, S. S. K.; Wang, J. J. *European J. Org. Chem.* 2015, 2015 (14), 3171.

## 3. X-Ray Crystal Structure of 3d

(*Z*)-1-(4-bromophenyl)-4-(cyclohexylamino)-5-(cyclohexylimino)-2-oxo-2,5-dihydro-1*H*-pyrrole-3-carbonitrile (**3d**) (CCDC 1482888)

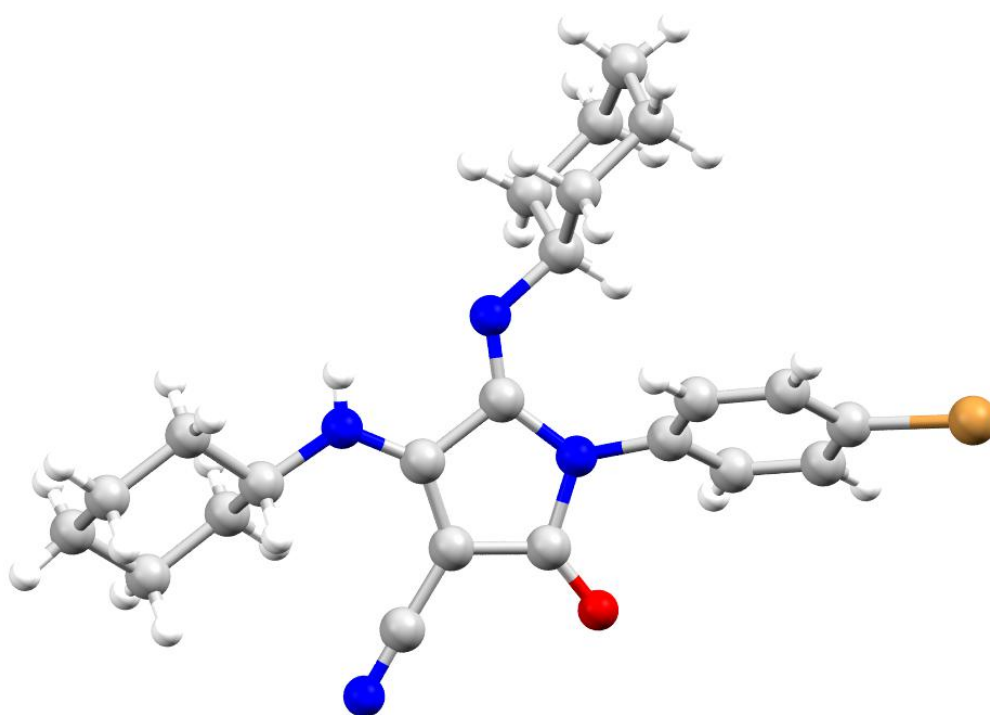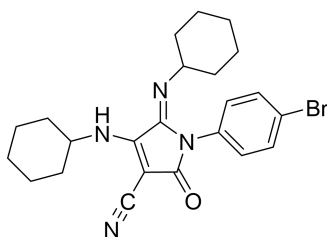

**Figure S1.** X-Ray crystal structure of **3d**, with 50% probability displacement ellipsoids

**Table S1.** Crystal Data and Structure Refinement for **3d**

|                      |                                                    |        |
|----------------------|----------------------------------------------------|--------|
| Empirical formula    | C <sub>23</sub> H <sub>27</sub> BrN <sub>4</sub> O |        |
| Formula weight       | 455.39                                             |        |
| Temperature          | 173.1500 K                                         |        |
| Wavelength           | 0.71073 Å                                          |        |
| Crystal system       | Triclinic                                          |        |
| Space group          | P -1                                               |        |
| Unit cell dimensions | a = 11.5777(16) Å                                  | = 90°. |
|                      | b = 12.8278(18) Å                                  | = 90°. |
|                      | c = 15.3442(19) Å                                  | = 90°. |
| Volume               | 2169.6(5) Å <sup>3</sup>                           |        |
| Z                    | 4                                                  |        |
| Density (calculated) | 1.394 Mg/m <sup>3</sup>                            |        |



|                                   |                                             |
|-----------------------------------|---------------------------------------------|
| Absorption coefficient            | 1.916 mm <sup>-1</sup>                      |
| F(000)                            | 944                                         |
| Crystal size                      | 0.528 x 0.436 x 0.206 mm <sup>3</sup>       |
| Theta range for data collection   | 1.906 to 27.506°.                           |
| Index ranges                      | -15<=h<=15, -16<=k<=15, -19<=l<=19          |
| Reflections collected             | 18414                                       |
| Independent reflections           | 9763 [R(int) = 0.0318]                      |
| Completeness to theta = 26.000°   | 98.3 %                                      |
| Absorption correction             | Semi-empirical from equivalents             |
| Max. and min. transmission        | 1.00000 and 0.67856                         |
| Refinement method                 | Full-matrix least-squares on F <sup>2</sup> |
| Data / restraints / parameters    | 9763 / 0 / 531                              |
| Goodness-of-fit on F <sup>2</sup> | 1.089                                       |
| Final R indices [I>2sigma(I)]     | R1 = 0.0496, wR2 = 0.1054                   |
| R indices (all data)              | R1 = 0.0616, wR2 = 0.1122                   |
| Extinction coefficient            | n/a                                         |
| Largest diff. peak and hole       | 0.725 d -0.597 e.Å <sup>-3</sup>            |

#### 4. <sup>1</sup>H NMR, <sup>13</sup>C NMR and HRMS of 3, 5

##### (Z)-4-(cyclohexylamino)-5-(cyclohexylimino)-2-oxo-1-phenyl-2,5-dihydro-1H-pyrrole-3-carbonitrile. (3a)

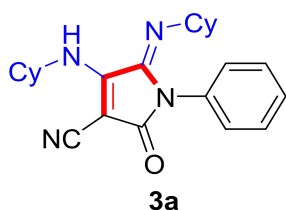

White solid, 189.6 mg, 84% yield, m.p. = 187 - 189 °C. <sup>1</sup>H NMR ( CDCl<sub>3</sub>, 500 MHz ) δ 7.43 - 7.42 (t, *J* = 3.15 Hz, 3H, ArH), 7.24 - 7.21 (m, 2H, ArH), 6.68 (br s, 1H, NH), 3.39 (br s, 1H, CH), 3.00 - 2.95 (m, 1H, CH), 2.15 - 2.13 (m, 2H, CyH), 1.83-1.79 (m, 2H, CyH), 1.71 - 1.67 (m, 1H, CyH),

1.55 - 1.50 (m, 4H, CyH), 1.43 - 1.35 (m, 5H, CyH), 1.28 - 1.14 (m, 3H, CyH), 1.07 - 0.99 (m, 1H, CyH), 0.74 - 0.66 (m, 2H, Cy H); <sup>13</sup>C NMR ( CDCl<sub>3</sub>, 125 MHz ) δ 168.48, 153.51, 140.46, 135.20, 129.26, 129.04, 128.81, 114.05, 69.17, 55.67, 52.74, 33.62, 33.02, 25.11, 24.06; HRMS (ESI) *m/z* calcd for C<sub>23</sub>H<sub>29</sub>N<sub>4</sub>O<sup>+</sup> [M+H]<sup>+</sup> 377.2336, found 377.2332.

##### (Z)-4-(cyclohexylamino)-5-(cyclohexylimino)-1-(4-fluorophenyl)-2-oxo-2,5-dihydro-1H-pyrrole-3-carbonitrile. (3b (Z/E=11/89))

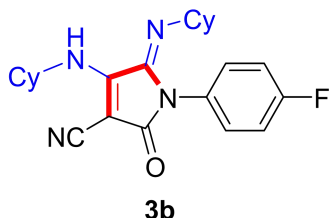

White solid, 193.9 mg, 82% yield, m.p. = 182 - 184 °C. <sup>1</sup>H NMR ( CDCl<sub>3</sub>, 500 MHz ) δ 7.23 - 7.20 (m, 2H, ArH), 7.15 - 7.10 (m, 2H, ArH), 6.69 (br s, 1H, NH), 3.94 (br s, 1H, CH), 3.04 - 2.98 (m, 1H, CH), 2.15 - 2.12 (m, 2H, CyH), 1.83 - 1.79 (m, 2H, CyH), 1.71 - 1.68 (m, 1H, CyH),

1.60 - 1.56 (m, 2H, CyH), 1.50 - 1.39 (m, 7H, CyH), 1.26 - 1.18 (m, 3H, CyH), 1.11 - 1.03 (m, 1H, CyH), 0.81 - 0.73 (m, 2H, CyH); <sup>13</sup>C NMR ( CDCl<sub>3</sub>, 125 MHz ) δ 168.41, 162.66 (d, <sup>1</sup>*J*<sub>CF</sub>=249.6 Hz), 153.46, 140.32, 131.16, 130.57 (d, <sup>3</sup>*J*<sub>CF</sub>=6.9 Hz), 116.26 (d, <sup>2</sup>*J*<sub>CF</sub>=22.8 Hz), 113.82, 69.23, 55.68, 52.74, 33.62, 33.00, 25.09, 24.02; HRMS (ESI) *m/z* calcd for C<sub>23</sub>H<sub>28</sub>FN<sub>4</sub>O<sup>+</sup> (M+H)<sup>+</sup> 395.22417, found 395.22412.

##### (Z)-1-(4-chlorophenyl)-4-(cyclohexylamino)-5-(cyclohexylimino)-2-oxo-2,5-dihydro-1H-pyrrole-3-carbonitrile. (3c (Z/E=8/92))

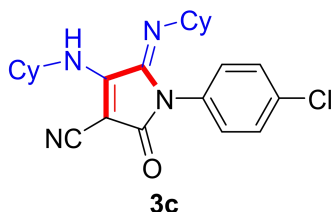

White solid, 216.6 mg, 88% yield, m.p. = 178 - 180 °C. <sup>1</sup>H NMR ( CDCl<sub>3</sub>, 500 MHz ) δ 7.41 (d, *J* = 7.80 Hz, 2H, ArH), 7.17 (d, *J* = 7.85 Hz, 2H, ArH), 6.70 (br s, 1H, NH), 3.94 (br s, 1H, CH), 3.04 (br s, 1H, CH), 2.15 - 2.13 (m,

2H, CyH), 1.82 - 1.80 (m, 2H, CyH), 1.68 (br s, 1H, CyH), 1.59 - 1.57 (m, 2H, CyH), 1.50 - 1.41 (m, 7H, CyH), 1.26 - 1.21 (m, 3H, CyH), 1.09 - 1.07 (m, 1H, CyH), 0.80 - 0.77 (m, 2H, CyH);  $^{13}\text{C}$  NMR (  $\text{CDCl}_3$ , 125 MHz )  $\delta$  168.27, 153.45, 140.09, 135.00, 133.74, 130.03, 129.45, 113.82, 69.21, 55.79, 52.79, 33.57, 32.98, 25.16, 25.06, 24.02; **HRMS** (ESI)  $m/z$  calcd for  $\text{C}_{23}\text{H}_{28}\text{ClN}_4\text{O}^+$  ( $\text{M}+\text{H}$ ) $^+$  411.19462, found 411.19455.

**(Z)-1-(4-bromophenyl)-4-(cyclohexylamino)-5-(cyclohexylimino)-2-oxo-2,5-dihydro-1H-pyrrole-3-carbonitrile. (3d)**

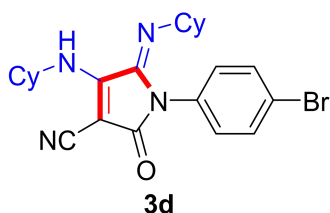

White solid, 234.3 mg, 86% yield, m.p. = 184 - 186 °C.  $^1\text{H}$  NMR (  $\text{CDCl}_3$ , 500 MHz )  $\delta$  7.55 (d,  $J$  = 8.45 Hz, 2H, ArH), 7.11 (d,  $J$  = 8.45 Hz, 2H, ArH), 6.68 (d,  $J$  = 7.65 Hz, 1H, NH), 3.93 - 3.92 (m, 1H, CH), 3.06 - 3.02 (m, 1H, CH), 2.14 - 2.12 (m, 2H, CyH), 1.82 - 1.79 (m, 2H, CyH), 1.70

- 1.68 (m, 1H, CyH), 1.58 - 1.57 (m, 2H, CyH), 1.51 - 1.35 (m, 7H, CyH), 1.27-1.17 (m, 3H, CyH), 1.10 - 1.03 (m, 1H, CyH), 0.81 - 0.74 (m, 2H, CyH);  $^{13}\text{C}$  NMR (  $\text{CDCl}_3$ , 125 MHz )  $\delta$  168.21, 153.47, 140.04, 134.28, 132.46, 130.34, 123.00, 113.82, 69.23, 55.83, 52.80, 33.58, 33.00, 25.19, 25.08, 24.04; **HRMS** (ESI)  $m/z$  calcd for  $\text{C}_{23}\text{H}_{28}\text{BrN}_4\text{O}^+$  ( $\text{M}+\text{H}$ ) $^+$  455.14410, found 455.14386.

**(Z)-4-(cyclohexylamino)-5-(cyclohexylimino)-2-oxo-1-(4-(trifluoromethyl)phenyl)-2,5-dihydro-1H-pyrrole-3-carbonitrile. (3e (Z/E=8/92))**

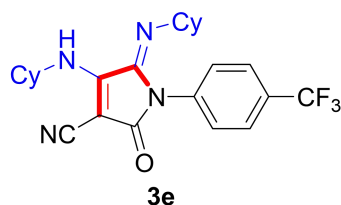

White solid, 242.5 mg, 91% yield, m.p. = 193 - 195 °C.  $^1\text{H}$  NMR (  $\text{CDCl}_3$ , 500 MHz )  $\delta$  7.71 (d,  $J$  = 8.0 Hz, 2H, ArH), 7.38 (d,  $J$  = 7.9 Hz, 2H, ArH), 6.72 (d,  $J$  = 6.8 Hz, 1H, NH), 3.94 (br s, 1H, CH), 2.98 - 2.94 (m, 1H, CH), 2.15 - 2.13 (m, 2H, CyH), 1.83 - 1.80 (m, 2H, CyH), 1.71

- 1.69 (m, 1H, CyH), 1.58 - 1.53 (m, 2H, CyH), 1.50 - 1.40 (m, 7H, CyH), 1.29 - 1.20 (m, 3H, CyH), 1.08 - 1.03 (m, 1H, CyH), 0.76 - 0.68 (m, 2H, CyH);  $^{13}\text{C}$  NMR (  $\text{CDCl}_3$ , 125 MHz )  $\delta$  167.99, 153.49, 139.86, 138.62, 131.08 (q,  $^2J_{\text{CF}}=32.91$  Hz), 129.17, 126.29, 123.57 (q,  $^1J_{\text{CF}}=271.93$  Hz), 113.70, 69.29, 56.15, 52.88, 33.49, 32.98, 25.07, 23.99; **HRMS** (ESI)  $m/z$  calcd for  $\text{C}_{24}\text{H}_{28}\text{F}_3\text{N}_4\text{O}^+$  ( $\text{M}+\text{H}$ ) $^+$  445.22097, found 445.22110.

**(Z)-1-(3-chlorophenyl)-4-(cyclohexylamino)-5-(cyclohexylimino)-2-oxo-2,5-dihydro-1H-pyrrole-3-carbonitrile. (3f)**

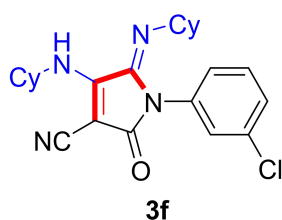

White solid, 196.8 mg, 80% yield, m.p. = 167 - 169 °C.  $^1\text{H}$  NMR (  $\text{CDCl}_3$ , 500 MHz )  $\delta$  7.43 - 7.36 (m, 2H, ArH), 7.26 (s,

1H, ArH), 7.16 (d,  $J = 7.7$  Hz, 1H, ArH), 6.70 (d,  $J = 7.8$  Hz, 1H, NH), 3.97 - 3.91 (br s, 1H, CH), 3.02 - 2.97 (br s, 1H, CH), 2.15 - 2.12 (m, 2H, CyH), 1.83 - 1.80 (m, 2H, CyH), 1.71 - 1.69 (m, 1H, CyH), 1.60 - 1.58 (m, 2H, CyH), 1.53 - 1.36 (m, 7H, CyH), 1.29 - 1.20 (m, 3H, CyH), 1.11 - 1.04 (m, 1H, CyH), 0.79 - 0.76 (m, 2H, CyH);  $^{13}\text{C}$  NMR (CDCl<sub>3</sub>, 125 MHz)  $\delta$  168.03, 153.46, 140.02, 136.45, 134.78, 130.10, 129.19, 128.96, 127.01, 113.73, 69.31, 56.03, 52.79, 33.56, 32.99, 25.19, 25.07, 24.02; HRMS (ESI)  $m/z$  calcd for C<sub>23</sub>H<sub>28</sub>ClN<sub>4</sub>O<sup>+</sup> (M+H)<sup>+</sup> 411.19462, found 411.19455.

**(Z)-1-(2-chlorophenyl)-4-(cyclohexylamino)-5-(cyclohexylimino)-2-oxo-2,5-dihydro-1H-pyrrole-3-carbonitrile. (3g)**

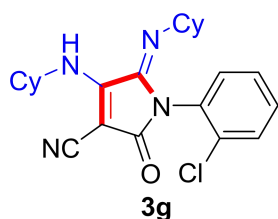

White solid, 204.3 mg, 83% yield, m.p. = 161 - 163 °C. IR (KBr)  $\nu$ : 3435, 3264, 2934, 2854, 2212, 1735, 1722, 1681, 1640, 1530, 1481, 1449, 1370, 1089;  $^1\text{H}$  NMR (CDCl<sub>3</sub>, 500 MHz)  $\delta$  7.49 (d,  $J = 7.8$  Hz, 1H, ArH), 7.41 - 7.39 (m, 1H, ArH), 7.35 (d,  $J = 3.3$  Hz, 2H, ArH), 6.68 (br s, 1H, NH), 3.95

(br s, 1H, CH), 2.88 (br s, 1H, CH), 2.17 (m, 2H, CyH), 1.83 - 1.81 (m, 2H, CyH), 1.72 - 1.69 (m, 1H, CyH), 1.60 - 1.39 (m, 8H, CyH), 1.34 - 1.14 (m, 4H, CyH), 1.06 - 1.04 (m, 1H, CyH), 0.80 - 0.65 (m, 2H, CyH);  $^{13}\text{C}$  NMR (CDCl<sub>3</sub>, 125 MHz)  $\delta$  167.68, 153.43, 139.50, 134.37, 133.20, 131.27, 130.68, 129.95, 127.67, 113.89, 69.33, 55.99, 52.83, 34.10, 33.61, 33.07, 25.10, 24.09; HRMS (ESI)  $m/z$  calcd for C<sub>23</sub>H<sub>28</sub>ClN<sub>4</sub>O<sup>+</sup> (M+H)<sup>+</sup> 411.19462, found 411.19452.

**(Z)-4-(cyclohexylamino)-5-(cyclohexylimino)-2-oxo-1-(p-tolyl)-2,5-dihydro-1H-pyrrole-3-carbonitrile. (3h)**

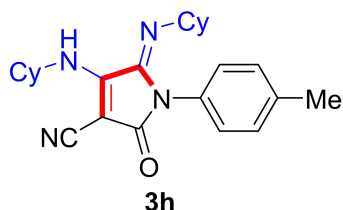

White solid, 166.2 mg, 71% yield, m.p. = 179 - 183 °C. IR (KBr)  $\nu$ : 3435, 3231, 2934, 2854, 2209, 1718, 1675, 1638, 1620, 1534, 1512, 1449, 1362, 1070, 805 cm<sup>-1</sup>;  $^1\text{H}$  NMR (CDCl<sub>3</sub>, 500 MHz)  $\delta$  7.22 (d,  $J = 7.8$  Hz, 2H, ArH), 7.10 (d,  $J = 7.9$  Hz, 2H, ArH), 6.69 (br s, 1H, NH),

3.93 (br s, 1H, CH), 3.08 - 3.04 (br s, 1H, CH), 2.40(s, 3H, CH), 2.15 - 2.13 (m, 2H, CyH), 1.82 - 1.80 (m, 2H, CyH), 1.71 - 1.68 (m, 1H, CyH), 1.56 - 1.36 (m, 9H, CyH), 1.28 - 1.16 (m, 3H, CyH), 1.07 - 1.04 (m, 1H, CyH), 0.78 - 0.70 (m, 2H, CyH);  $^{13}\text{C}$  NMR (CDCl<sub>3</sub>, 125 MHz)  $\delta$  168.66, 153.51, 140.58, 139.09, 132.42, 129.85, 128.50, 114.10, 69.12, 55.43, 52.69, 33.63, 32.98, 25.22, 24.04, 21.20; HRMS (ESI)  $m/z$  calcd for C<sub>24</sub>H<sub>31</sub>N<sub>4</sub>O<sup>+</sup> (M+H)<sup>+</sup> 391.24924, found 391.24933.

**(Z)-4-(cyclohexylamino)-5-(cyclohexylimino)-1-(4-methoxyphenyl)-2-oxo-2,5-dihydro-1H-pyrrole-3-carbonitrile. (3i)**

**ydro-1H-pyrrole-3-carbonitrile. (3i)**

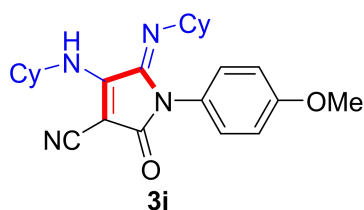

White solid, 143.8 mg, 59% yield, m.p. = 182 - 183 °C.

<sup>1</sup>H NMR ( CDCl<sub>3</sub>, 500 MHz ) δ 7.14 (d, *J* = 8.55 Hz, 2H, ArH), 6.93 (d, *J* = 8.55 Hz, 2H, ArH), 6.69 (br s, 1H, NH), 3.93 (br s, 1H, CH), 3.84 (s, 3H, CH), 3.07 (m, 1H, CH), 2.15 -2.05 (m, 2H, CyH), 1.81 (m, 2H,

CyH), 1.67 (m, 2H, CyH), 1.55 (s, 1H, CyH), 1.39 - 1.50 (m, 7H, CyH), 1.19 - 1.27 (m, 3H, CyH), 1.02 - 1.10 (m, 1H, CyH), 0.73 - 0.81 (m, 2H, CyH); <sup>13</sup>C NMR ( CDCl<sub>3</sub>, 125 MHz ) δ 168.80, 159.92, 153.46, 140.65, 129.87, 127.53, 114.51, 114.11, 69.05, 55.54, 55.38, 52.69, 33.67, 33.00, 25.21, 25.09, 24.06; HRMS (ESI) m/z calcd for C<sub>24</sub>H<sub>31</sub>N<sub>4</sub>O<sub>2</sub><sup>+</sup>(M+H)<sup>+</sup>407.24415, found 407.24414.

**(Z)-1-(benzo[d][1,3]dioxol-5-yl)-4-(cyclohexylamino)-5-(cyclohexylimino)-2-oxo-2,5-dihydro-1H-pyrrole-3-carbonitrile. (3j)**

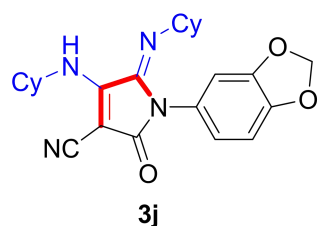

White solid, 133.6 mg, 53% yield, m.p. = 181 - 184 °C. <sup>1</sup>H

NMR ( CDCl<sub>3</sub>, 500 MHz ) δ 6.84 (d, *J* = 8.40 Hz, 1H, NH), 6.72 - 6.71 (m, 3H, ArH), 6.05 (d, *J* = 18.70 Hz, 2H, CH<sub>2</sub>), 3.93 (br s, 1H, CH), 3.16 (br s, 1H, CH), 2.15 (d, *J* = 10.35 Hz, 2H, CyH), 1.82 (d, *J* = 13.20 Hz, 2H, CyH), 1.71 (d, *J*

= 12.85 Hz, 1H,CyH), 1.61 (s, 2H, CyH), 1.51 - 1.39 (m, 7H, CyH), 1.27 - 1.23 (m, 3H, CyH), 1.12 - 1.09 (m, 1H, CyH), 0.88 - 0.83 (m, 2H, CyH); <sup>13</sup>C NMR ( CDCl<sub>3</sub>, 125 MHz ) δ 168.68, 153.40, 148.20, 148.16, 140.45, 128.51, 122.44, 114.05, 109.58, 108.32, 101.93, 68.06, 55.52, 55.73, 33.65, 33.00, 25.25, 25.08, 24.07; HRMS (ESI) m/z calcd for C<sub>24</sub>H<sub>29</sub>N<sub>4</sub>O<sub>3</sub><sup>+</sup>(M+H)<sup>+</sup> 421.22342, found 421.22342.

**(Z)-1-benzyl-4-(cyclohexylamino)-5-(cyclohexylimino)-2-oxo-2,5-dihydro-1H-pyrrole-3-carbonitrile. (3k)**

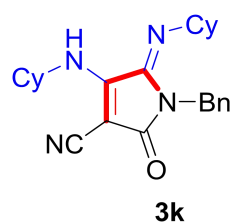

White solid, 173.3 mg, 74% yield, m.p. = 158 - 161 °C. <sup>1</sup>H NMR

( CDCl<sub>3</sub>, 500 MHz ) δ 7.32 (t, *J* = 7.43 Hz, 2H, ArH), 7.25 (t, *J* = 7.37 Hz, 1H, ArH), 7.10 (d, *J* = 7.35 Hz, 2H, ArH), 6.68 (br s, 1H, NH), 4.91 (s, 2H, CH), 3.90 (br s, 1H, CH), 3.66 - 3.62 (m, 1H, CH), 2.12 (d, 2H, CyH), 1.81 - 1.78 (m, 2H, CyH), 1.70 - 1.67 (m,

1H, CyH), 1.63 - 1.67 (m, 2H, CyH), 1.56 - 1.53 (m, 1H, CyH), 1.49 - 1.43 (m, 2H, CyH), 1.40 - 1.35 (m, 2H, CyH), 1.32 - 1.21 (m, 5H, CyH), 1.15 - 0.99 (m, 3H, CyH); <sup>13</sup>C NMR ( CDCl<sub>3</sub>, 125 MHz ) δ 169.73, 153.18, 140.90, 114.22, 69.34, 56.09, 52.36, 34.74, 32.91, 30.47, 29.65, 26.65, 25.43, 25.10, 24.96, 24.38, 23.98; HRMS (ESI)

m/z calcd for C<sub>24</sub>H<sub>31</sub>N<sub>4</sub>O<sup>+</sup>(M+H)<sup>+</sup> 391.24924, found 391.24924.

**(Z)-4-(cyclohexylamino)-5-(cyclohexylimino)-1-(2,3-dihydronaphthalen-1-yl)-2-oxo-2,5-dihydro-1H-pyrrole-3-carbonitrile. (3l (Z/E=8/92))**

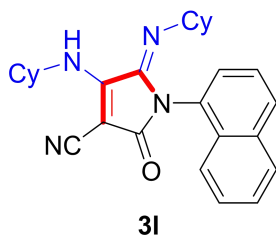

**3l**

White solid, 225.1 mg, 88% yield, m.p. = 219 - 222 °C. <sup>1</sup>H NMR ( CDCl<sub>3</sub>, 500 MHz ) δ 7.96 - 7.90 (m, 2H, ArH), 7.63 - 7.62 (m, 1H, ArH), 7.54 - 7.49 (m, 3H, ArH), 7.42 (d, *J* = 7.1 Hz, 1H, ArH), 6.76 (br s, 1H, NH), 4.01 (br s, 1H, CH), 2.60 - 2.56 (br s, 1H, CH), 2.21 (br s, 2H, CyH), 1.84 (br s, 2H, CyH), 1.73 - 1.71 (m, 1H, CyH), 1.56 - 1.42 (m, 5H, CyH), 1.31 - 1.23 (m, 4H, CyH), 1.13 - 0.98 (m, 2H, CyH), 0.93 - 0.86 (m, 2H, CyH), 0.44 - 0.48(m, 1H, CyH), 0.12 - 0.15(m, 1H, CyH); <sup>13</sup>C NMR ( CDCl<sub>3</sub>, 125 MHz ) δ 168.43, 153.46, 140.68, 134.09, 131.71, 131.38, 129.77, 128.45, 127.43, 127.08, 126.75, 125.28, 122.16, 114.06, 69.30, 55.99, 52.86, 33.99, 33.56, 33.08, 25.00, 24.08, 23.72; HRMS (ESI) m/z calcd for C<sub>27</sub>H<sub>31</sub>N<sub>4</sub>O<sup>+</sup> (M+H)<sup>+</sup> 427.24924, found 427.24893.

**(Z)-1-([1,1'-biphenyl]-2-yl)-4-(cyclohexylamino)-5-(cyclohexylimino)-2-oxo-2,5-dihydro-1H-pyrrole-3-carbonitrile. (3m)**

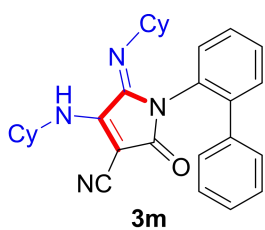

**3m**

White solid, 236.1 mg, 87% yield, m.p. = 176 - 178 °C. <sup>1</sup>H NMR ( CDCl<sub>3</sub>, 500 MHz ) δ 7.51 (t, *J* = 7.5 Hz, 1H, ArH), 7.42 (t, *J* = 7.3 Hz, 2H, ArH), 7.38 - 7.28 (m, 4H, ArH), 7.22 (d, *J* = 7.0 Hz, 2H, ArH), 6.41 (br s, 1H, NH), 3.84 (br s, 1H, CH), 2.89 - 2.84 (m, 1H, CH), 2.08 - 2.01 (m, 2H, CyH), 1.77 - 1.75 (m, 2H, CyH), 1.67 - 1.59 (m, 2H, CyH), 1.48 - 1.43 (m, 4H, CyH), 1.34 - 1.10 (m, 6H, CyH), 1.05 - 0.98 (m, 2H, CyH), 0.94 - 0.86 (m, 1H, CyH), 0.61 - 0.53 (m, 1H, CyH); <sup>13</sup>C NMR ( CDCl<sub>3</sub>, 125 MHz ) δ 163.31, 153.52, 142.35, 139.95, 138.19, 132.91, 130.57, 129.96, 129.76, 128.46, 128.33, 127.78, 114.16, 68.89, 55.35, 52.62, 34.22, 33.32, 32.83, 25.07, 24.00; HRMS (ESI) m/z calcd for C<sub>29</sub>H<sub>33</sub>N<sub>4</sub>O<sup>+</sup> (M+H)<sup>+</sup> 453.26489, found 453.26456.

**(Z)-4-(cyclohexylamino)-5-(cyclohexylimino)-2-oxo-1-(pyridin-2-yl)-2,5-dihydro-1H-pyrrole-3-carbonitrile. (3n (Z/E=26/74))**

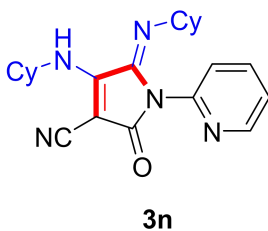

**3n**

White solid, 178.8 mg, 79% yield, m.p. = 143 - 145 °C. <sup>1</sup>H NMR ( CDCl<sub>3</sub>, 500 MHz ) δ 8.50 (d, *J* = 3.6 Hz, 1H, ArH), 7.84 (t, *J* = 7.6 Hz, 1H, ArH), 7.38 (d, *J* = 7.8 Hz, 1H, ArH), 7.34 (t, *J* = 7.0 Hz, 1H, ArH), 6.75 (br s, 1H, NH), 3.94 (br s, 1H, CH), 2.86 - 2.82 (m, 1H, CH), 2.15 - 2.12 (m, 2H, CyH),

1.94 - 1.92 (m, 1H, CyH), 1.82 - 1.80 (m, 2H, CyH), 1.70 - 1.68 (m, 2H, CyH), 1.60 - 1.33 (m, 7H, CyH), 1.31 - 1.22 (m, 3H, CyH), 1.16 - 1.05 (m, 1H, CyH), 0.81 - 0.74 (m, 2H, CyH);  $^{13}\text{C}$  NMR (CDCl<sub>3</sub>, 125 MHz)  $\delta$  168.15, 153.88, 148.92, 148.78, 139.92, 138.32, 123.53, 123.32, 113.87, 69.44, 57.57, 52.79, 33.27, 32.97, 25.28, 25.06, 24.91, 24.03; HRMS (ESI)  $m/z$  calcd for C<sub>22</sub>H<sub>28</sub>N<sub>5</sub>O<sup>+</sup> (M+H)<sup>+</sup> 378.22884, found 378.22888;

**(Z)-4-(cyclohexylamino)-5-(cyclohexylimino)-1-cyclopropyl-2-oxo-2,5-dihydro-1H-pyrrole-3-carbonitrile. (3o)**

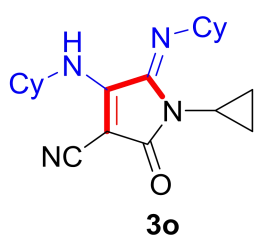

White solid, 136.8 mg, 67% yield, m.p. = 125 - 128 °C.  $^1\text{H}$  NMR (CDCl<sub>3</sub>, 500 MHz)  $\delta$  6.59 (d,  $J$  = 5.09 Hz, 1H, NH), 4.55 - 4.52 (m, 1H, CH), 3.81 (br s, 1H, CH), 2.62 (m, 1H, CH), 2.05 (m, 2H, CH), 1.81 - 1.75 (m, 4H, CH), 1.71 - 1.65 (m, 5H, CH), 1.48 - 1.40 (m, 3H, CH), 1.36 - 1.28 (m, 5H, CH), 1.25 -

1.23 (m, 1H, CH), 0.99 - 0.95 (m, 4H, CH);  $^{13}\text{C}$  NMR (CDCl<sub>3</sub>, 125 MHz)  $\delta$  169.02, 152.94, 141.27, 114.16, 68.94, 55.86, 52.49, 34.69, 32.92, 25.49, 25.08, 24.33, 23.99, 9.16; HRMS (ESI)  $m/z$  calcd for C<sub>20</sub>H<sub>29</sub>N<sub>4</sub>O<sup>+</sup>(M+H)<sup>+</sup> 341.23359, found 341.23364.

**(Z)-1-cyclohexyl-4-(cyclohexylamino)-5-(cyclohexylimino)-2-oxo-2,5-dihydro-1H-pyrrole-3-carbonitrile. (3p)**

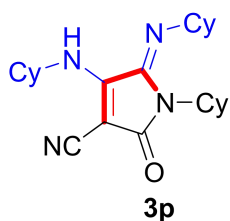

White solid, 160.5 mg, 70% yield, m.p. = 111 - 113 °C.  $^1\text{H}$  NMR (CDCl<sub>3</sub>, 500 MHz)  $\delta$  6.61 (br s, 1H, NH), 3.81 - 3.75 (m, 3H, CH), 2.33 - 2.23(s, 2H, CyH), 2.07 - 2.05 (m, 2H, CyH), 1.88 - 1.81 (m, 5H, CyH), 1.75 - 1.70 (m, 7H, CyH), 1.46 - 1.42 (m, 4H, CyH), 1.37 - 1.30 (m, 5H, CyH), 1.25 - 1.16 (m, 5H, CyH);  $^{13}\text{C}$

NMR (CDCl<sub>3</sub>, 125 MHz)  $\delta$  169.22, 153.60, 140.49, 137.19, 128.80, 127.48, 125.78, 114.20, 68.55, 56.11, 52.75, 44.46, 34.44, 32.97, 25.29, 25.08, 24.06; HRMS (ESI)  $m/z$  calcd for C<sub>23</sub>H<sub>35</sub>N<sub>4</sub>O<sup>+</sup>(M+H)<sup>+</sup> 383.28054, found 383.28058.

**(Z)-4-(tert-butylamino)-5-(tert-butylimino)-2-oxo-1-phenyl-2,5-dihydro-1H-pyrrole-3-carbonitrile. (3q)**

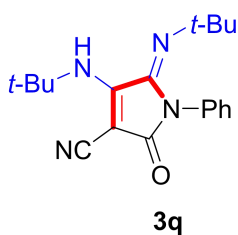

White solid, 116.7 mg, 60% yield, m.p. = 211 - 212 °C.  $^1\text{H}$  NMR (CDCl<sub>3</sub>, 500 MHz)  $\delta$  7.44 - 7.43 (m, 3H, ArH), 7.37 (br s, 1H, NH), 7.21 - 7.20 (m, 2H, ArH), 1.57 (s, 9H, *t*-Bu-H), 0.98 (s, 9H, *t*-Bu-H);  $^{13}\text{C}$  NMR (CDCl<sub>3</sub>, 125 MHz)  $\delta$  170.56, 152.09, 139.30, 136.49, 130.26, 129.13, 116.02, 68.94, 54.69, 53.18,

31.08, 29.71; HRMS (ESI)  $m/z$  calcd for C<sub>19</sub>H<sub>25</sub>N<sub>4</sub>O<sup>+</sup>(M+H)<sup>+</sup> 325.20229, found

325.20221.

**(Z)-3-acetyl-4-(cyclohexylamino)-5-(cyclohexylimino)-1-phenyl-1,5-dihydro-2H-pyrrol-2-one. (5a)**

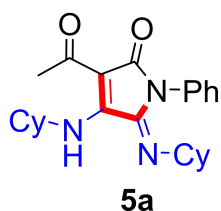

White solid, 160.4 mg, 68% yield, m.p. = 199 – 201 °C. <sup>1</sup>H NMR ( CDCl<sub>3</sub>, 500 MHz ) δ 10.37 (d, *J* = 6.10 Hz, 1H, NH), 7.43 - 7.40 (m, 3H, ArH), 7.26 (d, *J* = 8.00 Hz, 2H, ArH), 4.90 (br s, 1H, CH), 3.10 - 3.06 (m, 1H, CH), 2.48 (s, 3H, CH<sub>3</sub>), 2.04 (s, 2H, CyH), 1.78 (s, 2H, CyH), 1.63 (d, 1H, CyH), 1.57 - 1.54 (m, 2H, CyH), 1.47 - 1.45 (m, 2H, CyH), 1.40 - 1.32 (m, 5H, CyH), 1.26 - 1.18 (m, 3H, CyH), 1.15 - 1.08 (m, 1H, CyH), 0.82 - 0.75 (m, 2H, CyH); <sup>13</sup>C NMR ( CDCl<sub>3</sub>, 125 MHz ) δ 195.41, 169.47, 158.10, 140.88, 136.57, 129.07, 128.78, 128.46, 98.34, 56.28, 52.33, 33.64, 33.26, 28.04, 25.32, 24.44, 23.82; HRMS (ESI) m/z calcd for C<sub>24</sub>H<sub>32</sub>N<sub>3</sub>O<sub>2</sub><sup>+</sup> (M+H)<sup>+</sup> 394.24890, found 394.24881.

**(Z)-3-acetyl-1-(4-chlorophenyl)-4-(cyclohexylamino)-5-(cyclohexylimino)-1,5-dihydro-2H-pyrrol-2-one. (5b)**

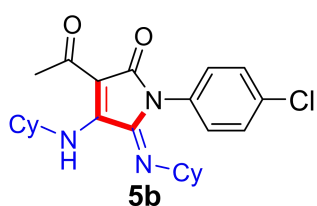

White solid, 64.1 mg, 25% yield, m.p. = 182 - 184 °C. <sup>1</sup>H NMR ( CDCl<sub>3</sub>, 500 MHz ) δ 10.39 (d, *J* = 7.45 Hz, 1H, NH), 7.43 -7.41 (m, 2H, ArH), 7.22 - 7.19 (m, 2H, ArH), 4.90 - 4.89 (m, 1H, CH), 3.16 - 3.12 (m, 1H, CH), 2.48 (s, 3H, CH<sub>3</sub>), 2.04 (br s, 2H, CyH), 1.80 - 1.79 (m, 2H, CyH), 1.62 - 1.59 (m, 4H, CyH), 1.50 - 1.47 (m, 2H, CyH), 1.38 - 1.35 (m, 4H, CyH), 1.30 - 1.25 (m, 3H, CyH), 1.18 - 1.13 (m, 1H, CyH), 0.91 - 0.86 (m, 2H, CyH); <sup>13</sup>C NMR (CDCl<sub>3</sub>, 125 MHz) δ 195.41, 169.22, 158.02, 140.58, 135.14, 134.33, 129.99, 129.26, 98.25, 56.38, 52.41, 33.58, 33.26, 28.09, 25.27, 24.44, 23.75; HRMS (ESI) m/z calcd for C<sub>24</sub>H<sub>31</sub>ClN<sub>3</sub>O<sub>2</sub><sup>+</sup>(M+H)<sup>+</sup> 428.20993, found 428.21002.

**(Z)-3-acetyl-4-(cyclohexylamino)-5-(cyclohexylimino)-1-(4-(trifluoromethyl)phenyl)-1,5-dihydro-2H-pyrrol-2-one. (5c)**

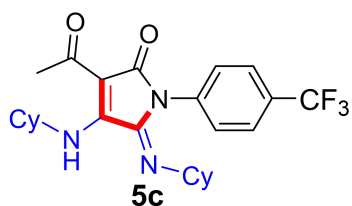

White solid, 44.3 mg, 16% yield, m.p. = 134 - 138 °C. <sup>1</sup>H NMR ( CDCl<sub>3</sub>, 500 MHz ) δ 10.40 (d, *J* = 7.75 Hz, 1H, NH), 7.71 (d, *J* = 8.25 Hz, 2H, ArH), 7.40 (d, *J* = 8.20 Hz, 2H, ArH), 4.88 (m, 1H, CH), 3.07 - 3.03 (m, 1H, CH), 2.48 (s, 3H, CH<sub>3</sub>), 2.04 (br s, 2H, CyH), 1.80 (br s, 2H, CyH), 1.62 - 1.57 (m, 4H, CyH), 1.48 - 1.46 (m, 2H, CyH), 1.39 - 1.35 (m, 4H, CyH), 1.29 - 1.25 (m, 3H, CyH), 1.16 - 1.14 (m, 1H, CyH), 0.82 - 0.79 (m, 2H,



CyH);  $^{13}\text{C}$  NMR (  $\text{CDCl}_3$ , 125 MHz )  $\delta$  195.42, 168.87, 158.05, 140.47, 140.06, 130.47(q,  $^2J_{\text{CF}}=32.96$  Hz), 128.99, 126.06, 123.72 (q,  $^1J_{\text{CF}}=272.27$  Hz), 98.28, 56.82, 52.47, 33.45, 33.27 28.08, 25.26, 24.41, 23.70; **HRMS** (ESI) m/z calcd for  $\text{C}_{25}\text{H}_{31}\text{F}_3\text{N}_3\text{O}_2^+$  (M+H) $^+$  462.23629, found 462.23633

**(Z)-3-acetyl-1-benzyl-4-(cyclohexylamino)-5-(cyclohexylimino)-1,5-dihydro-2H-pyrrol-2-one. (5d)**

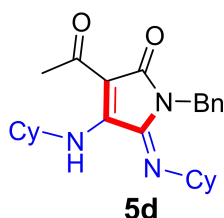

White solid, 102.6 mg, 42% yield, m.p. = 170 - 172 °C.  $^1\text{H}$  NMR (  $\text{CDCl}_3$ , 500 MHz )  $\delta$  10.39 (d,  $J = 6.47$  Hz, 1H, NH), 7.33 (t,  $J = 7.53$  Hz, 2H, ArH), 7.24 (t,  $J = 7.30$  Hz, 1H, ArH), 7.12 (d,  $J = 7.45$  Hz, 2H, ArH), 4.94 (s, 2H,  $\text{CH}_2$ ), 4.85 (br s, 1H, CH), 3.77 - 3.73 (m, 1H, CH), 2.53 (s, 3H,  $\text{CH}_3$ ), 1.99 (br s, 2H, CH), 1.75 - 1.69 (m, 3H, CyH), 1.65 - 1.62 (m, 3H, CyH), 1.55 - 1.53 (m, 1H, CyH), 1.41 - 1.39 (m, 2H, CyH), 1.32 - 1.26 (m, 6H, CyH), 1.19 - 1.15 (m, 1H, CyH), 1.11 - 1.06 (m, 2H, CyH);  $^{13}\text{C}$  NMR (  $\text{CDCl}_3$ , 125 MHz )  $\delta$  195.10, 169.70, 153.19, 140.85, 138.00, 128.70, 127.14, 125.67, 98.16, 56.57, 52.17, 44.16, 34.72, 33.22, 28.01, 25.42, 25.26, 24.42, 23.91; **HRMS** (ESI) m/z calcd for  $\text{C}_{25}\text{H}_{34}\text{N}_3\text{O}_2^+$ (M+H) $^+$  408.26455, found 408.26459.

**3-acetyl-4,5-bis(cyclohexylamino)-2H-pyrrol-2-one (5e)**

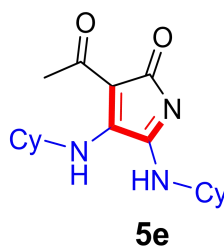

White solid; 57.1 mg, 30% yield, m.p. = 218 - 219 °C;  $^1\text{H}$  NMR (  $\text{CDCl}_3$ , 500 MHz )  $\delta$  10.18 (d,  $J = 7.50$  Hz, 1H, NH), 8.95 (s, 1H, NH), 4.88 - 4.86 (m, 1H, CH), 3.43 (br s, 1H, CH), 2.48 (s, 3H,  $\text{CH}_3$ ), 2.03 - 2.01 (m, 2H, CH), 1.79 - 1.77 (m, 5H, CyH), 1.65 - 1.62 (m, 3H, CyH), 1.48 - 1.42 (m, 4H, CyH), 1.39 - 1.32 (m, 5H, CyH), 1.30 - 1.25 (m, 1H, CyH);  $^{13}\text{C}$  NMR (  $\text{CDCl}_3$ , 125 MHz )  $\delta$  195.01, 170.78, 158.15, 144.43, 99.36, 58.74, 52.49, 33.24, 33.13, 27.97, 25.67, 25.24, 24.37, 24.04; **HRMS** (ESI) m/z calcd for  $\text{C}_{18}\text{H}_{28}\text{N}_3\text{O}_2^+$  (M+H) $^+$  318.21760, found 318.21762.

**(Z)-3-benzoyl-4-(cyclohexylamino)-5-(cyclohexylimino)-1-phenyl-1,5-dihydro-2H-pyrrol-2-one (5f)**

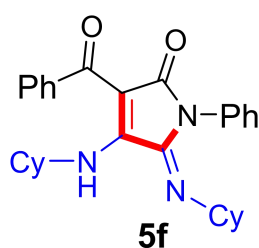

White solid, 60.3 mg, 21% yield, m.p. = 211-213°C.  $^1\text{H}$  NMR (  $\text{CDCl}_3$ , 500 MHz )  $\delta$  10.90 (d,  $J = 6.60$  Hz, 1H, NH), 7.71 (d,  $J = 7.45$  Hz, 2H, ArH), 7.41 - 7.34 (m, 6H, ArH), 7.25 (d,  $J = 7.15$  Hz, 2H, ArH), 5.02 - 5.00 (m, 1H, CH), 3.12 - 3.09 (m, 1H, CH), 2.12 - 2.10 (m, 2H, CyH), 1.83 - 1.81 (m, 2H, CyH), 1.66 - 1.64 (m, 1H, CyH), 1.58 - 1.56 (m, 2H, CyH), 1.50 - 1.48 (m,

2H, CyH), 1.44 - 1.38 (m, 5H, CyH), 1.28 - 1.22 (m, 3H, CyH), 1.16 - 1.09 (m, 1H, CyH), 0.83 - 0.78 (m, 2H, CyH),  $^{13}\text{C}$  NMR (CDCl<sub>3</sub>, 125 MHz)  $\delta$  191.82, 168.21, 160.02, 140.73, 139.27, 136.52, 130.78, 129.00, 128.84, 128.49, 127.30, 97.51, 56.31, 52.62, 33.69, 33.27, 25.32, 24.45, 23.87, HRMS (ESI) m/z calcd for C<sub>29</sub>H<sub>33</sub>N<sub>3</sub>O<sub>2</sub><sup>+</sup> (M+Na)<sup>+</sup> 478.2470, found 478.2474.

**(Z)-3-benzoyl-4-(cyclohexylamino)-5-(cyclohexylimino)-1-(4-methoxyphenyl)-1,5-dihydro-2H-pyrrol-2-one (5g)**

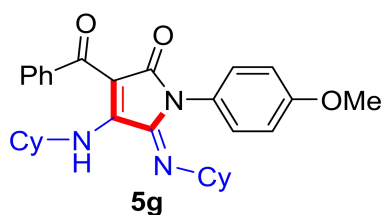

White solid, 66.9 mg, 23% yield, m.p. =198 -200 °C.  $^1\text{H}$  NMR (CDCl<sub>3</sub>, 500 MHz)  $\delta$  10.91 (d,  $J$  = 7.15 Hz, 1H, NH), 7.71 (d,  $J$  = 7.30 Hz, 2H, ArH), 7.40 (d,  $J$  = 7.25 Hz, 1H, ArH), 7.36 - 7.33 (m, 2H, ArH), 7.16 (d,  $J$  = 8.70 Hz, 2H, ArH), 6.91 (d,  $J$  = 8.55 Hz, 2H, ArH), 5.02 (br s, 1H, CH), 3.81 (s, 3H, MeH) 3.23 - 3.19 (m, 1H, CH), 2.11 - 2.10 (m, 2H, CyH), 1.82 - 1.80 (m, 2H, CyH), 1.66 - 1.58 (m, 3H, CyH), 1.51 - 1.49 (m, 2H, CyH), 1.44 - 1.38 (m, 5H, CyH), 1.27 - 1.23 (m, 3H, CyH), 1.16 - 1.12 (m, 1H, CyH), 0.90 - 0.83 (m, 2H, CyH);  $^{13}\text{C}$  NMR (CDCl<sub>3</sub>, 125 MHz)  $\delta$  191.73, 168.50, 160.00, 159.51, 140.92, 139.27, 130.75, 129.88, 128.45, 128.97, 128.55, 127.73, 127.27, 114.30, 97.48, 55.96, 55.52, 52.56, 33.76, 33.28, 25.32, 24.45, 23.87; HRMS (ESI) m/z calcd for C<sub>30</sub>H<sub>36</sub>N<sub>3</sub>O<sub>3</sub><sup>+</sup> (M+H)<sup>+</sup> 486.27512, found 486.27499

**(Z)-3-benzoyl-1-(4-bromophenyl)-4-(cyclohexylamino)-5-(cyclohexylimino)-1,5-dihydro-2H-pyrrol-2-one (5h)**

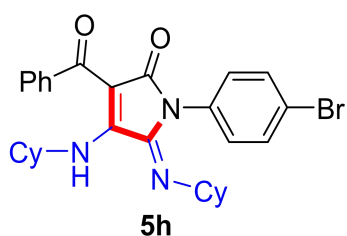

White solid, 38.4 mg, 12% yield, m.p. =203 - 205°C.  $^1\text{H}$  NMR (CDCl<sub>3</sub>, 500 MHz)  $\delta$  10.89 (d, 1H, NH), 7.78 - 7.69 (d, 2H, ArH), 7.53 - 7.52 (d, 2H, ArH), 7.48-7.34 (m, 3H, ArH), 7.14 - 7.12 (d, 2H, ArH), 5.00 (d, 1H, CH), 3.19 - 3.11 (m, 1H, CH), 2.10 - 2.09 (d, 2H, CyH), 1.94 - 1.80 (d, 2H, CyH), 1.66 - 1.61 (m, 3H, CyH), 1.51 - 1.48 (m, 3H, CyH), 1.35 - 1.31 (m, 4H, CyH), 1.29 - 1.21 (m, 3H, CyH), 1.18 - 0.92 (m, 1H, CyH), 0.89 - 0.84(m, 2H, CyH);  $^{13}\text{C}$  NMR (CDCl<sub>3</sub>, 125 MHz)  $\delta$  191.82, 167.91, 159.90, 140.36, 139.15, 135.63, 132.15, 130.90, 130.35, 129.40, 128.45, 127.81, 127.34, 122.27, 97.38, 56.43, 52.68, 33.60, 33.26, 25.29, 24.43, 23.76; HRMS (ESI) m/z calcd for C<sub>29</sub>H<sub>33</sub>BrN<sub>3</sub>O<sub>2</sub><sup>+</sup> (M+H)<sup>+</sup> 534.1756, found 534.1750.

**(Z)-4-(cyclohexylamino)-5-(cyclohexylimino)-2-oxo-N,1-diphenyl-2,5-dihydro-1H-pyrrole-3-carboxamide (5i)**

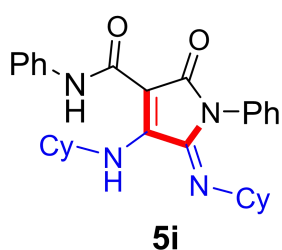

White solid, 87.5 mg, 31% yield, m.p. = 211- 213°C.  $^1\text{H}$  NMR (CDCl<sub>3</sub>, 500 MHz)  $\delta$  9.81 (s, 1H, NH), 9.29 (s, 1H, NH), 7.55 - 7.44 (d, 5H, ArH), 7.28 (s, 4H, ArH), 7.04 (s, 1H, ArH), 4.81

(s, 1H, CH), 3.13 (s, 1H, CH), 2.06 (s, 2H, CyH), 1.79 (s, 2H, CyH), 1.57 (s, 6H, CyH), 1.49 (s, 4H, CyH), 1.25 (s, 3H, CyH), 1.14 (s, 1H, CyH), 0.81 (s, 2H, CyH);  $^{13}\text{C}$  NMR (  $\text{CDCl}_3$ , 125 MHz )  $\delta$  171.11, 164.19, 156.81, 141.18, 138.37, 136.32, 129.24, 128.85, 128.62, 123.32, 119.66, 89.78, 56.46, 52.30, 33.59, 25.33, 24.64, 23.78; **HRMS** (ESI)  $m/z$  calcd for  $\text{C}_{29}\text{H}_{35}\text{N}_4\text{O}_2^+$  (M+H) $^+$  471.2760, found 471.2756.

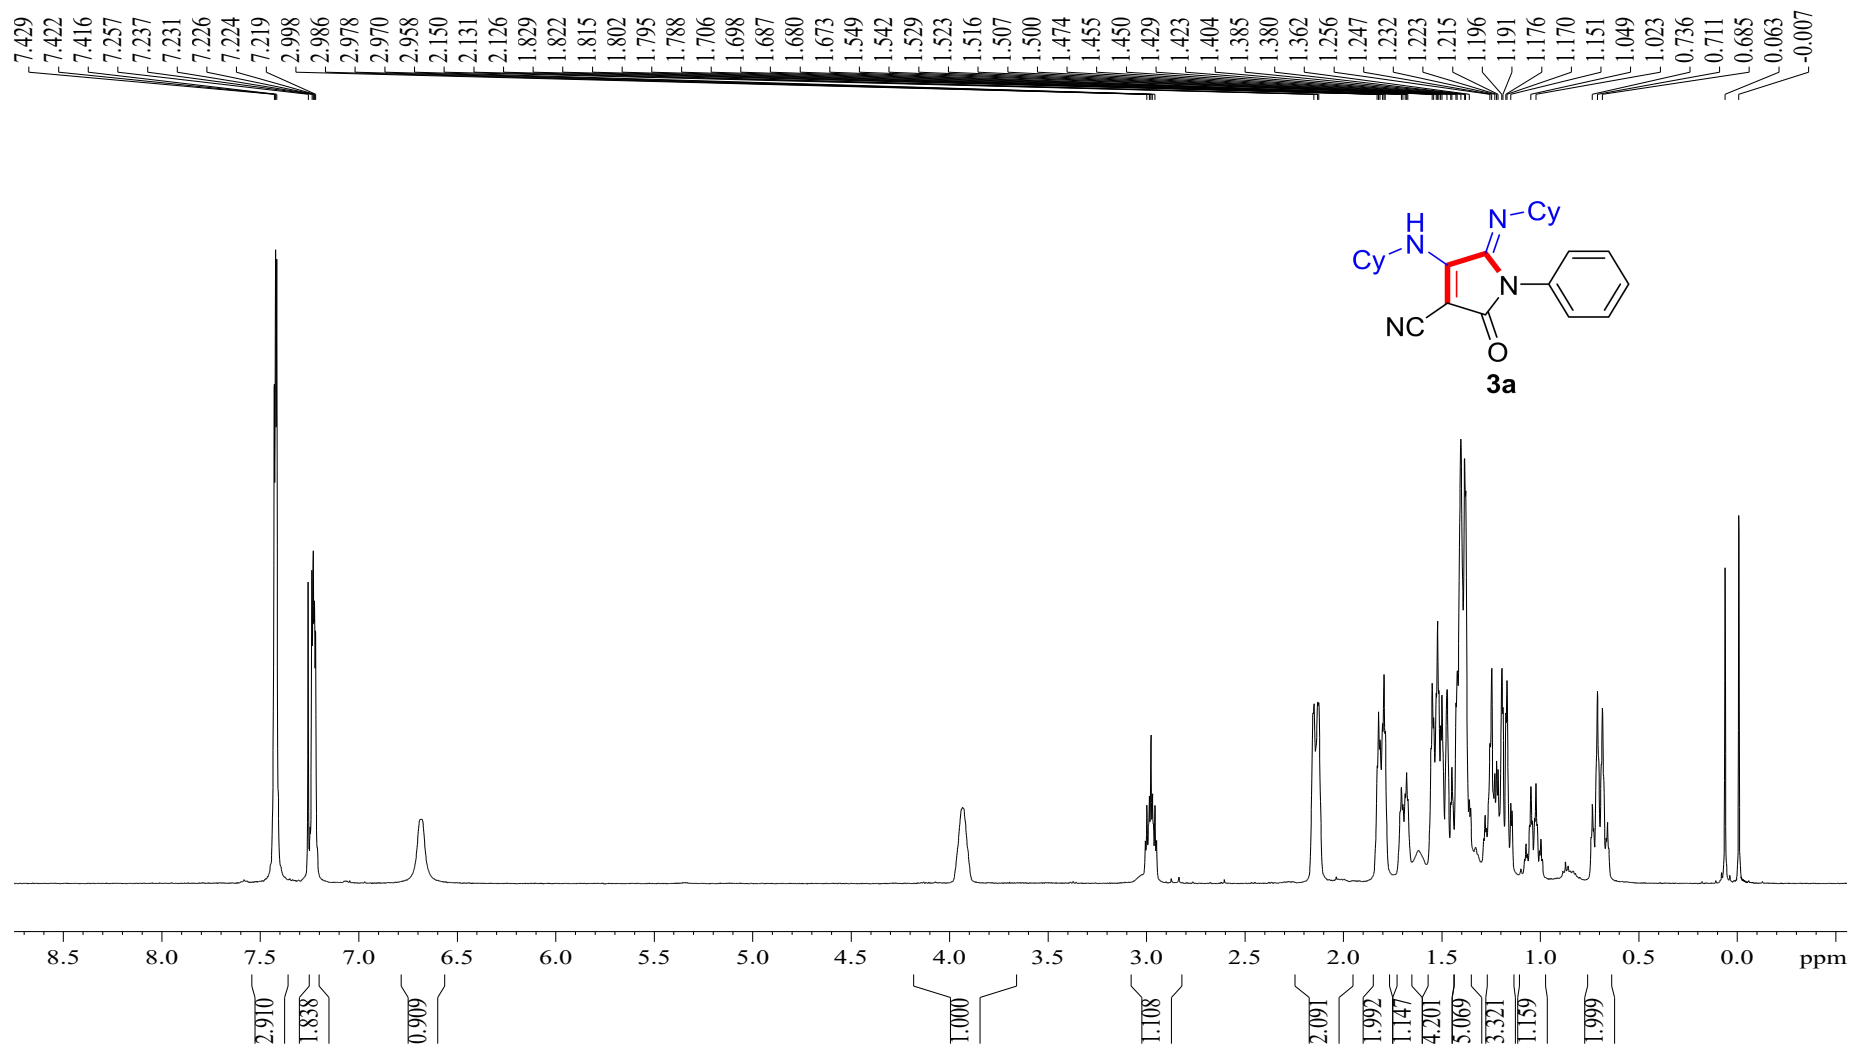

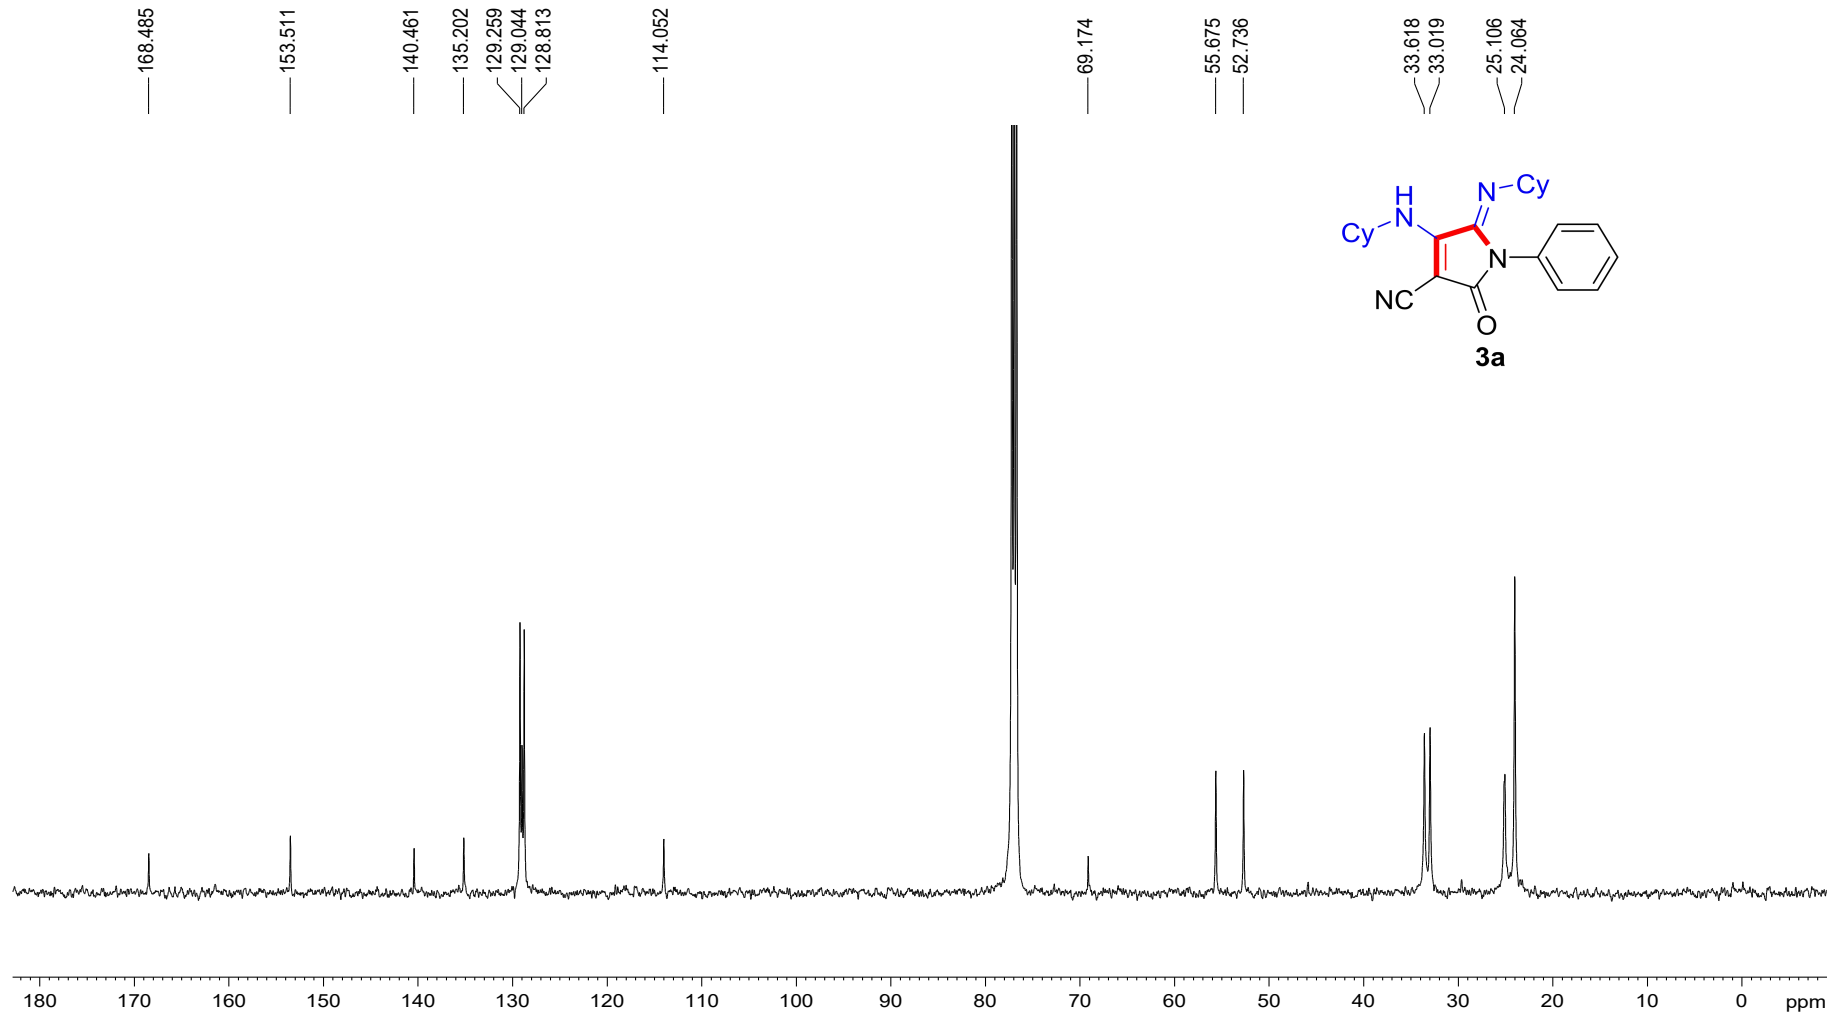

7.266  
7.234  
7.231  
7.224  
7.220  
7.216  
7.207  
7.144  
7.127  
7.110  
3.019  
3.012  
3.004  
2.991  
2.150  
2.131  
2.126  
1.835  
1.827  
1.820  
1.808  
1.800  
1.794  
1.712  
1.704  
1.693  
1.686  
1.679  
1.596  
1.589  
1.582  
1.569  
1.562  
1.556  
1.504  
1.477  
1.459  
1.453  
1.447  
1.436  
1.431  
1.425  
1.413  
1.392  
1.361  
1.265  
1.257  
1.249  
1.231  
1.225  
1.210  
1.205  
1.186  
1.179  
1.090  
1.083  
1.075  
1.057  
0.806  
0.780  
0.761  
0.754  
-0.001

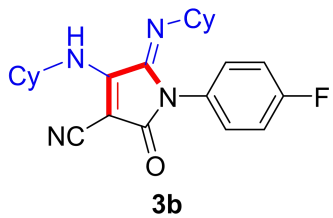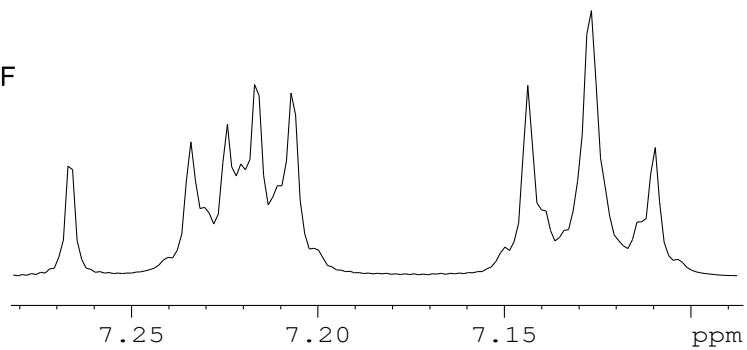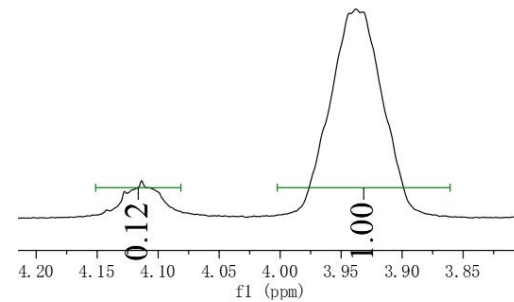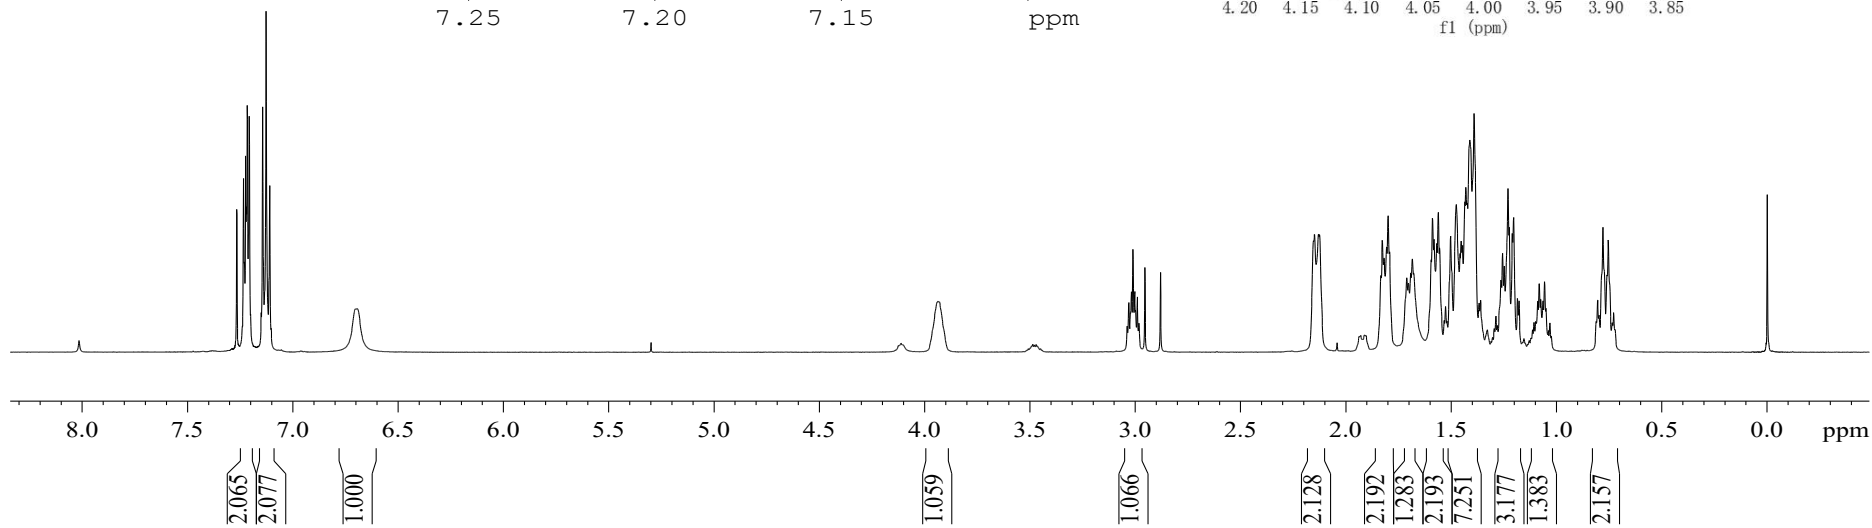

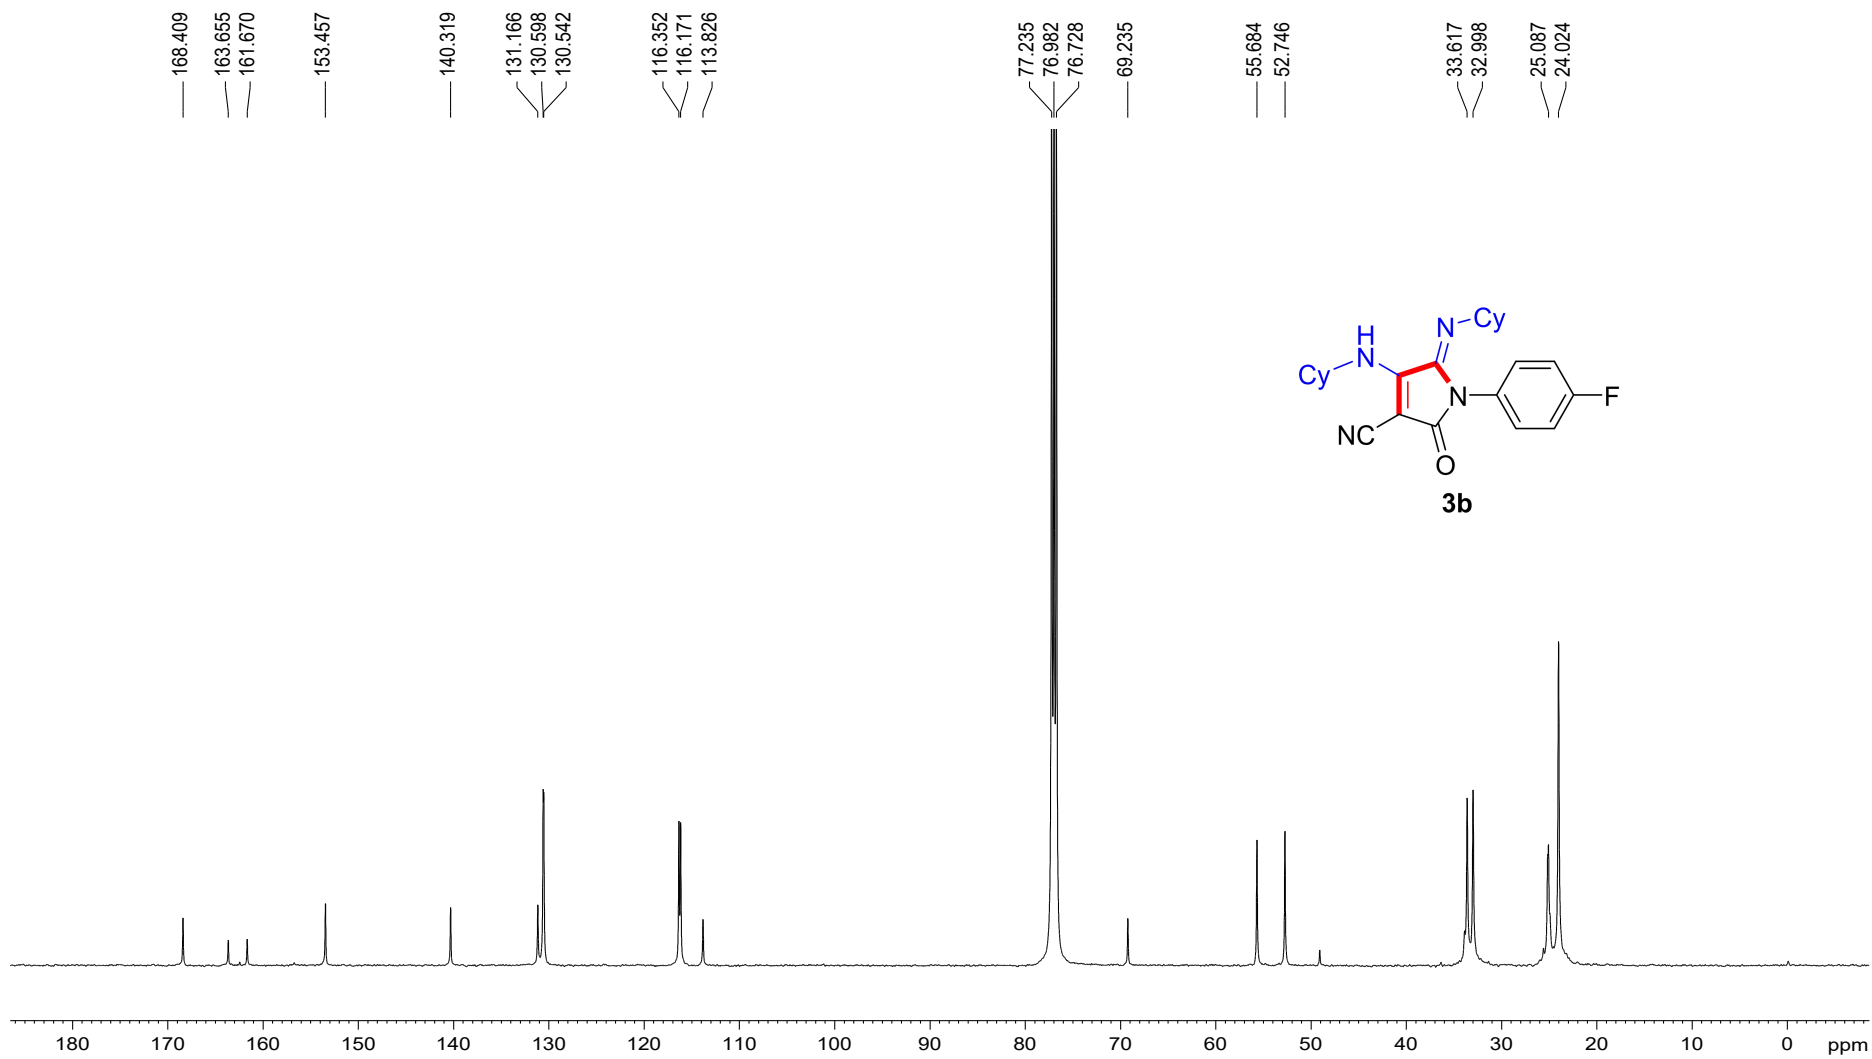

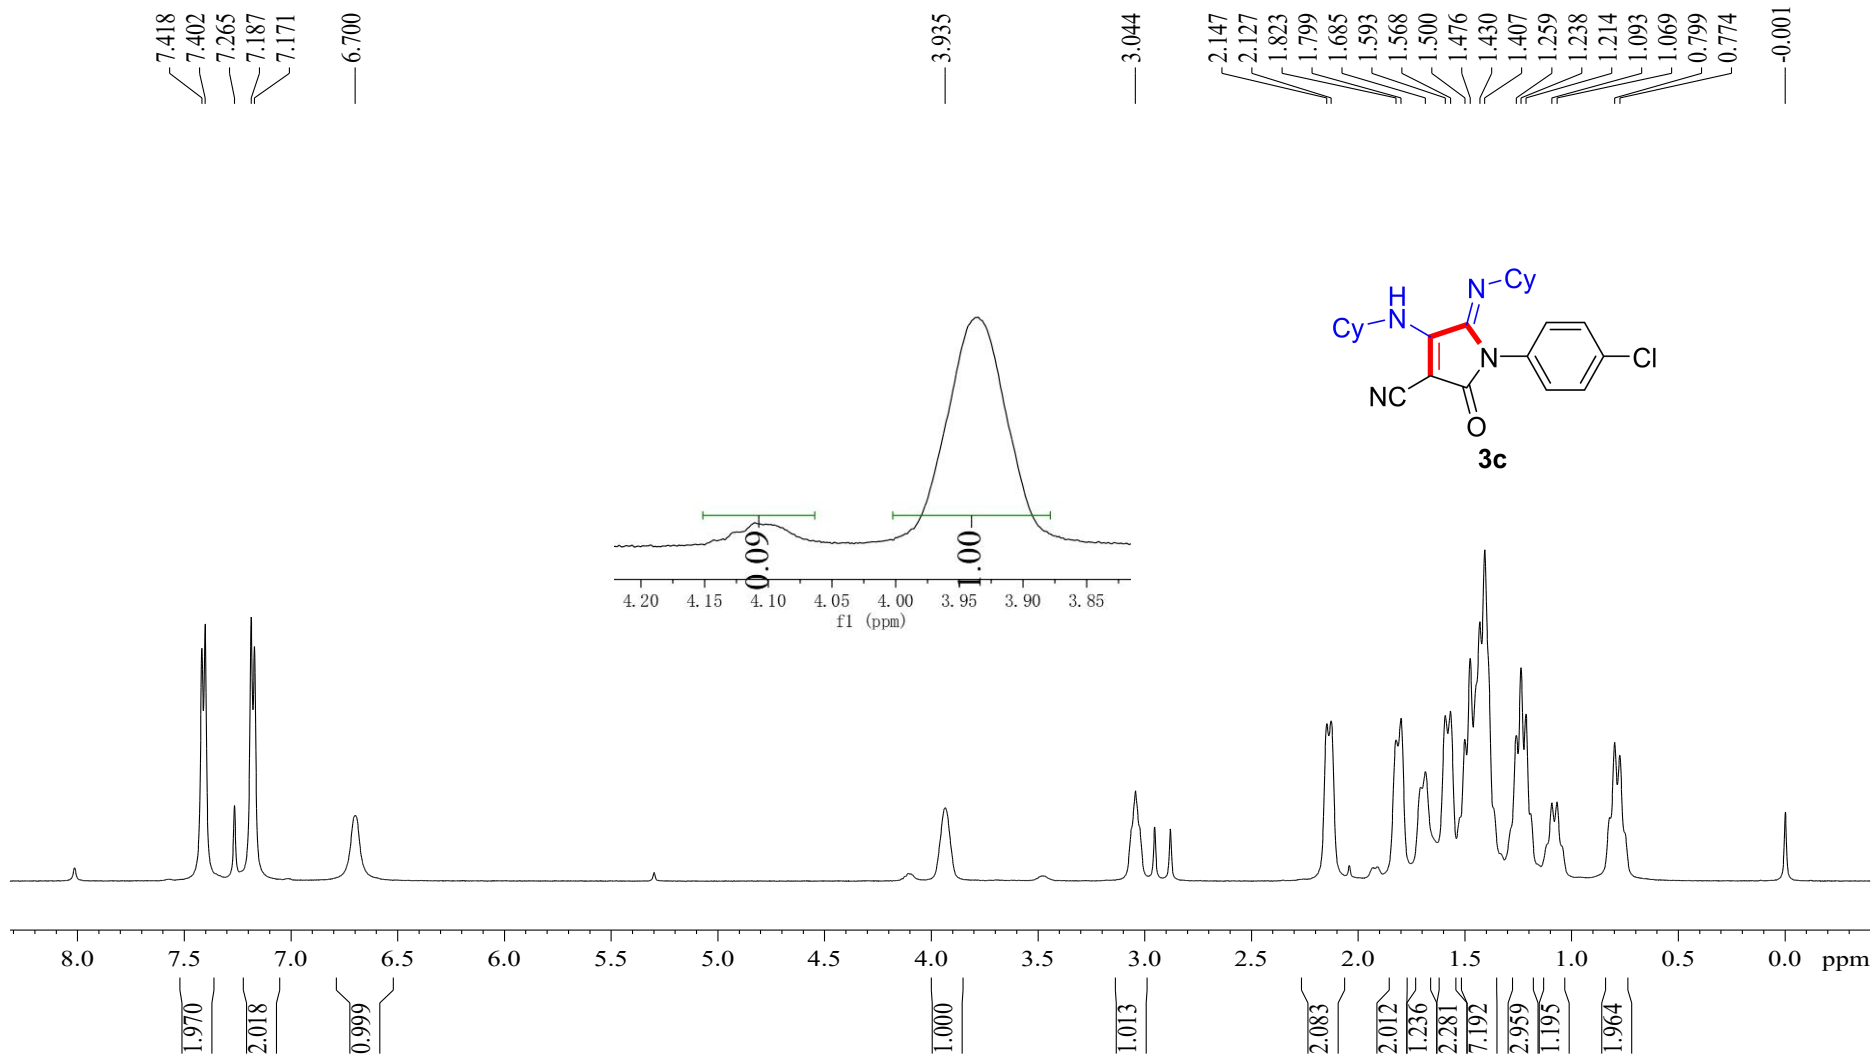



NJB-160812 13C 1D 2016 08 12

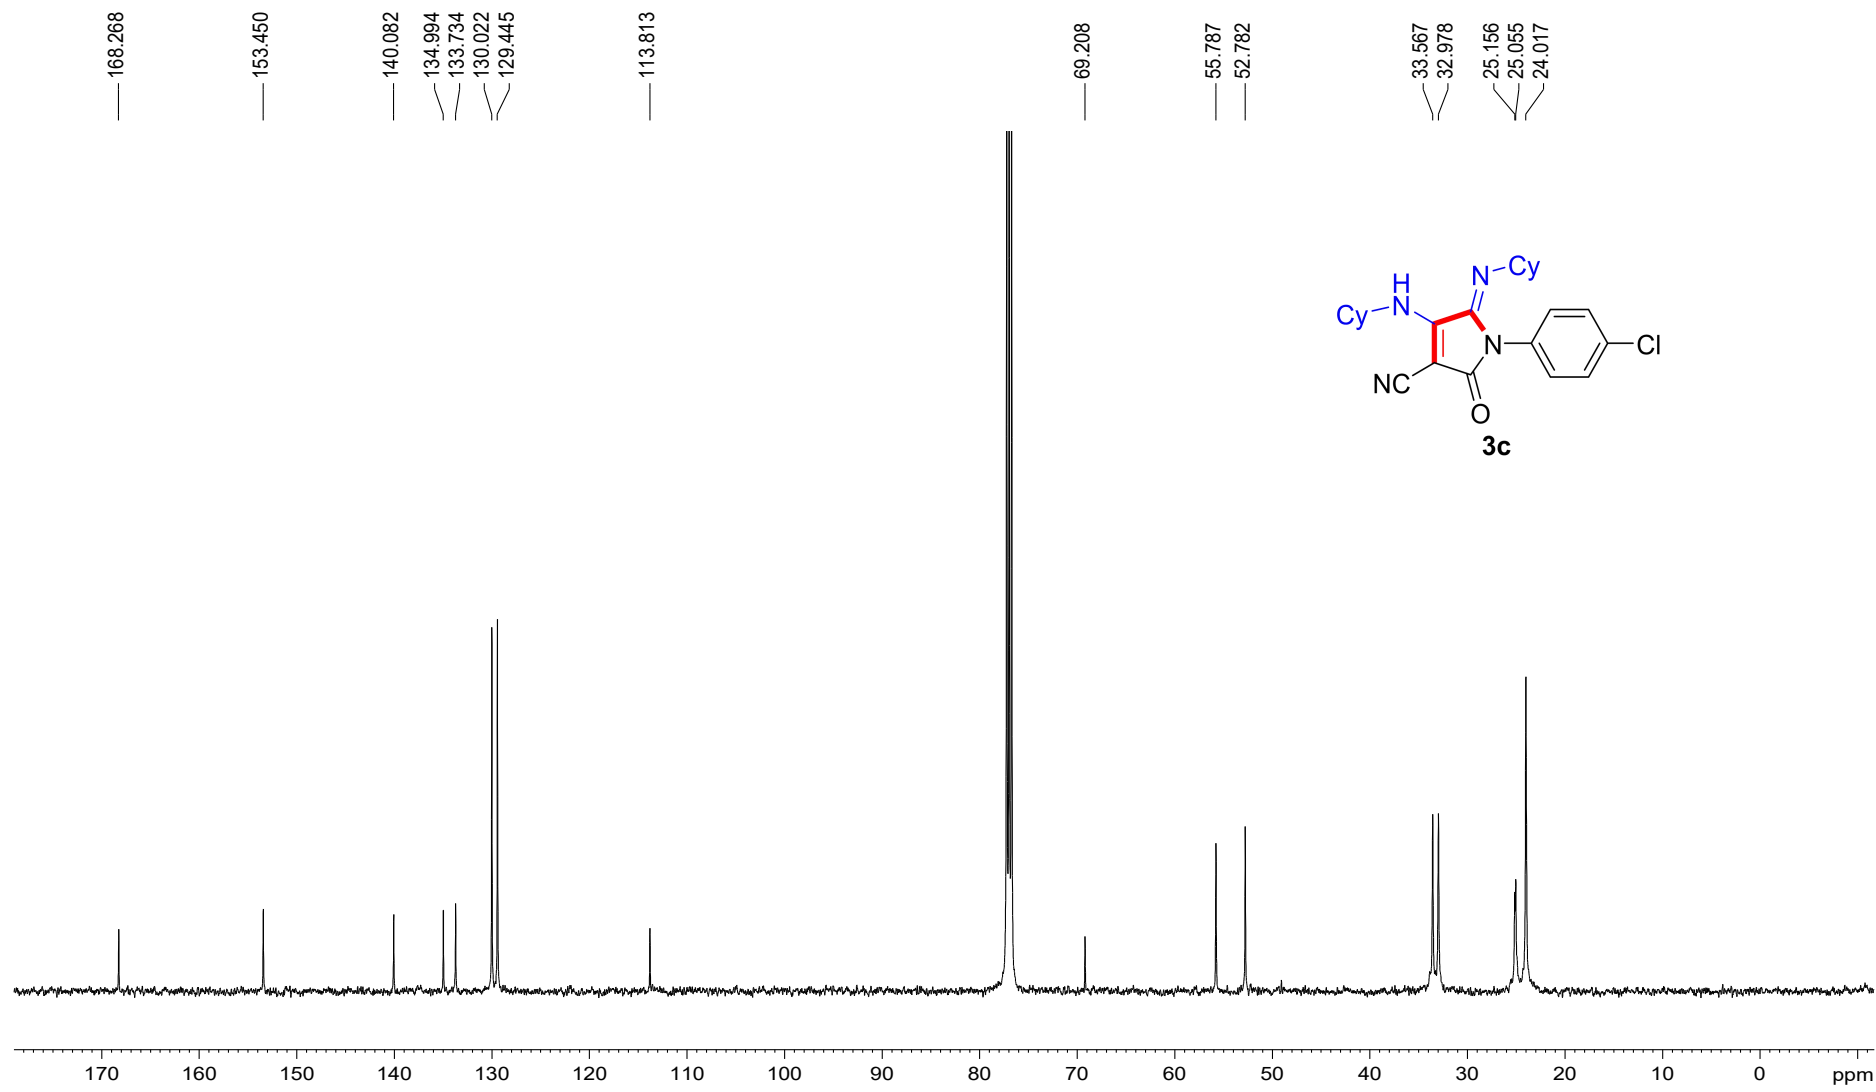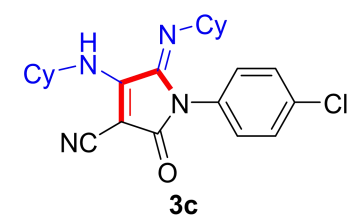

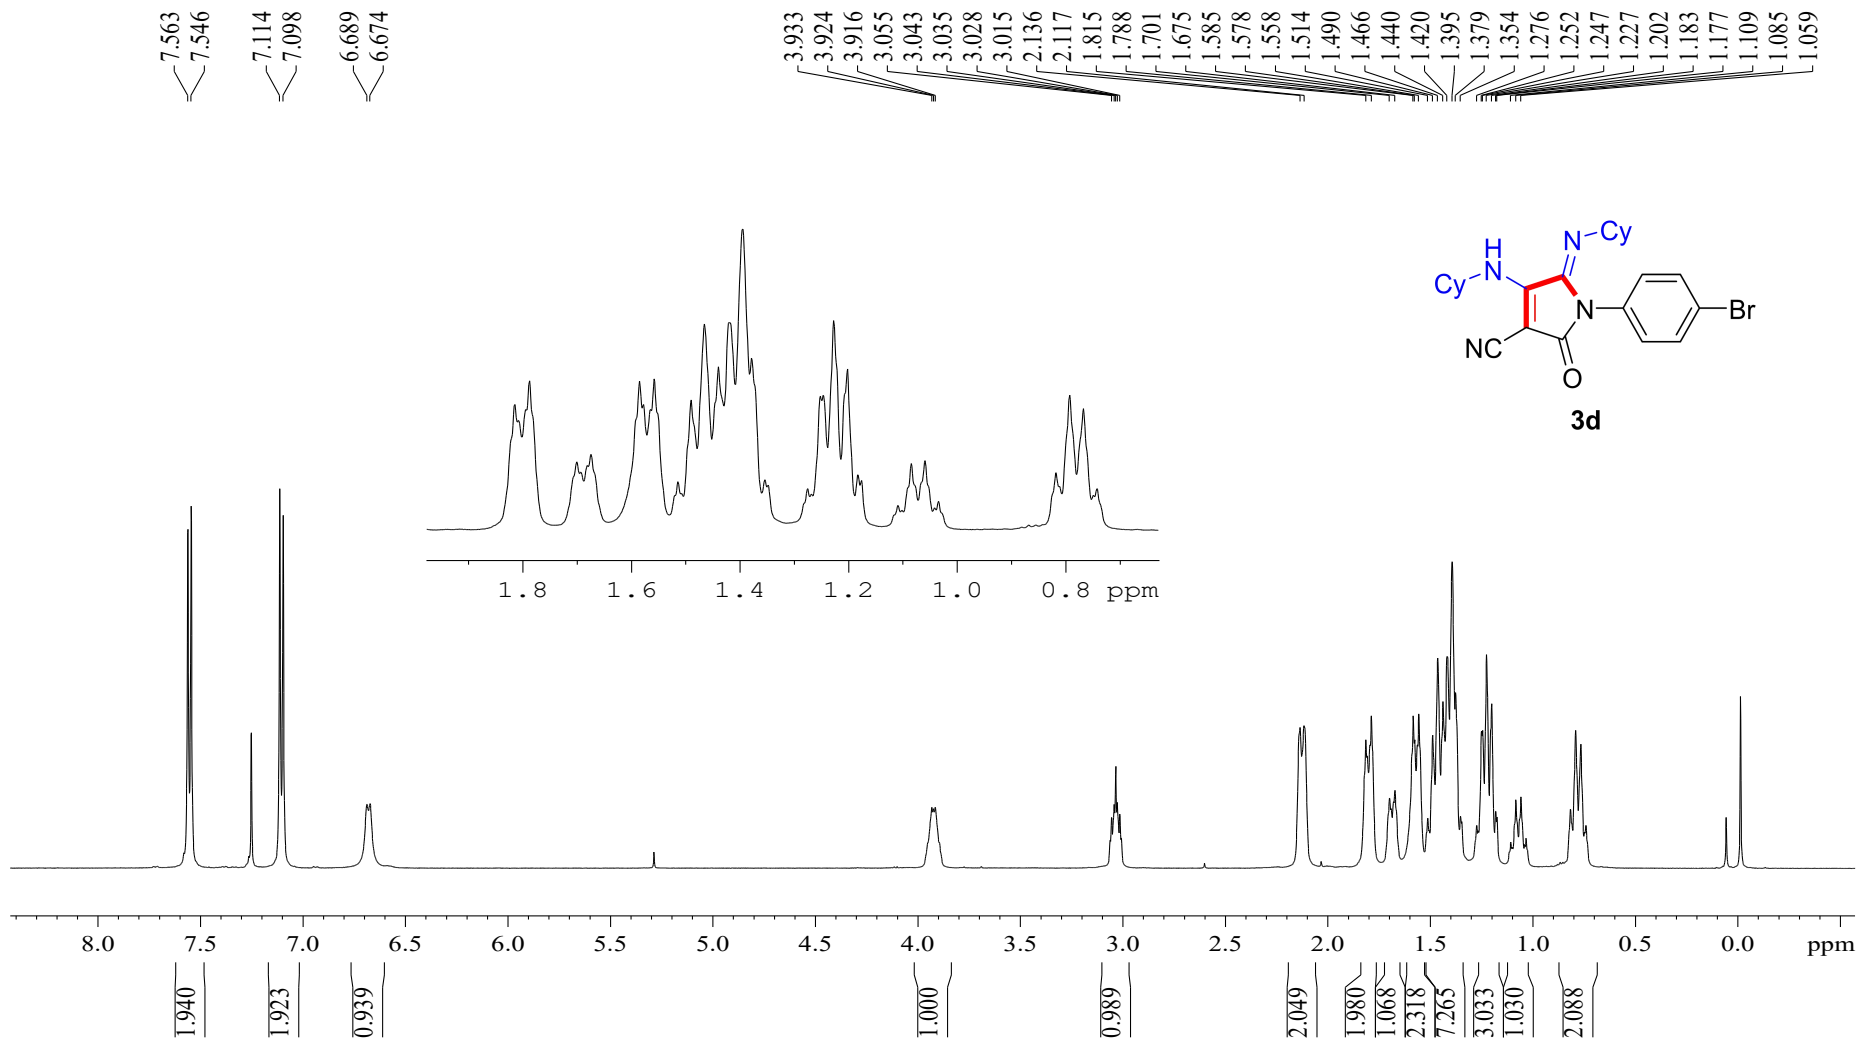

NJB-160523 13C 2016 05 25

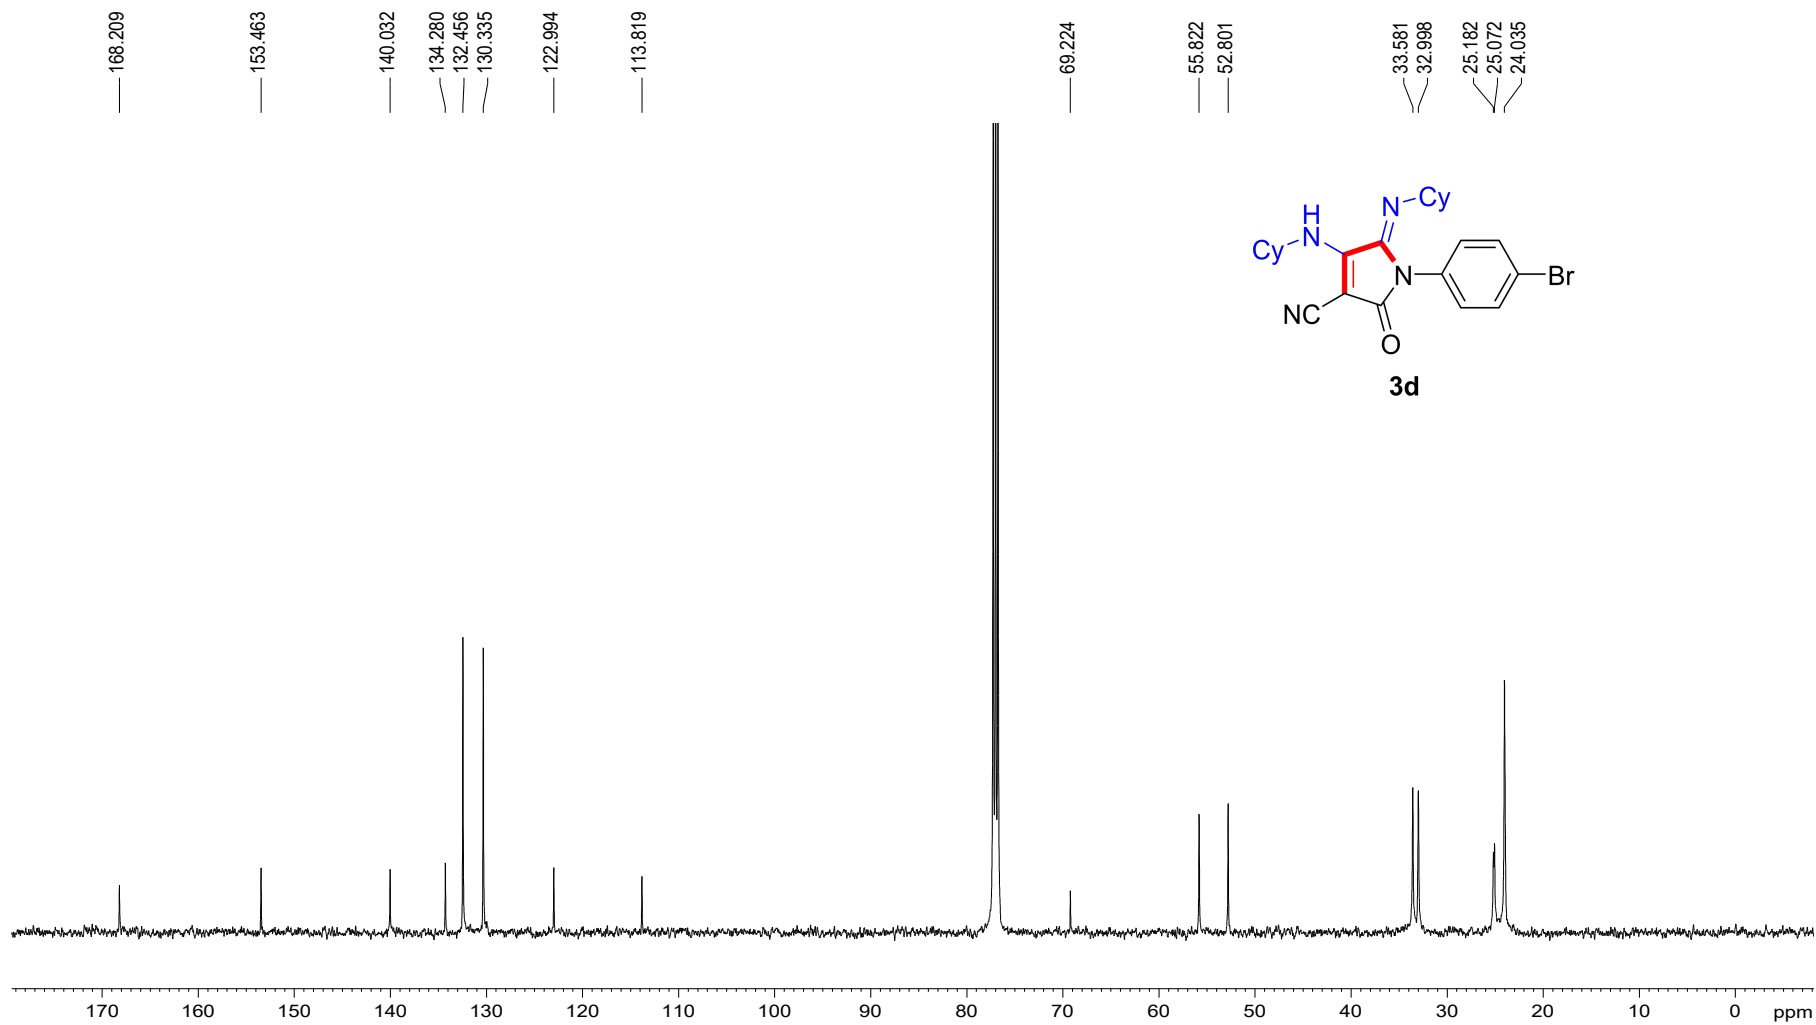

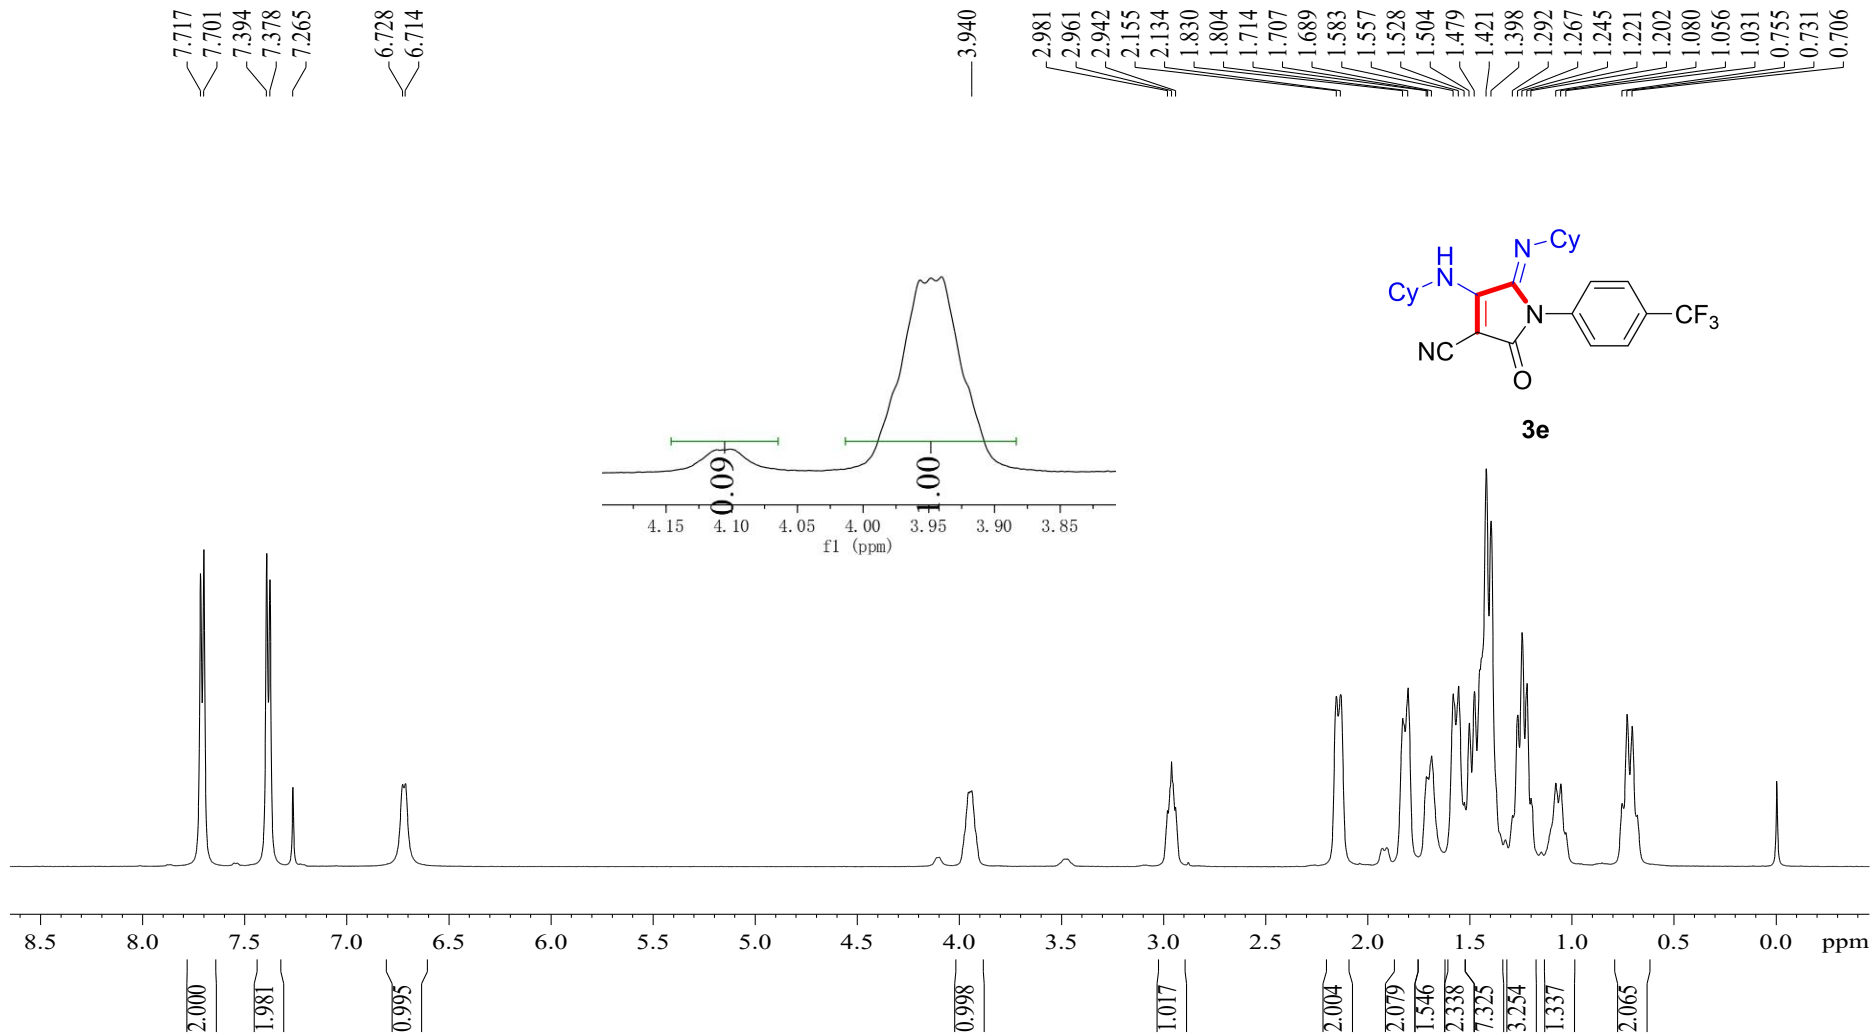

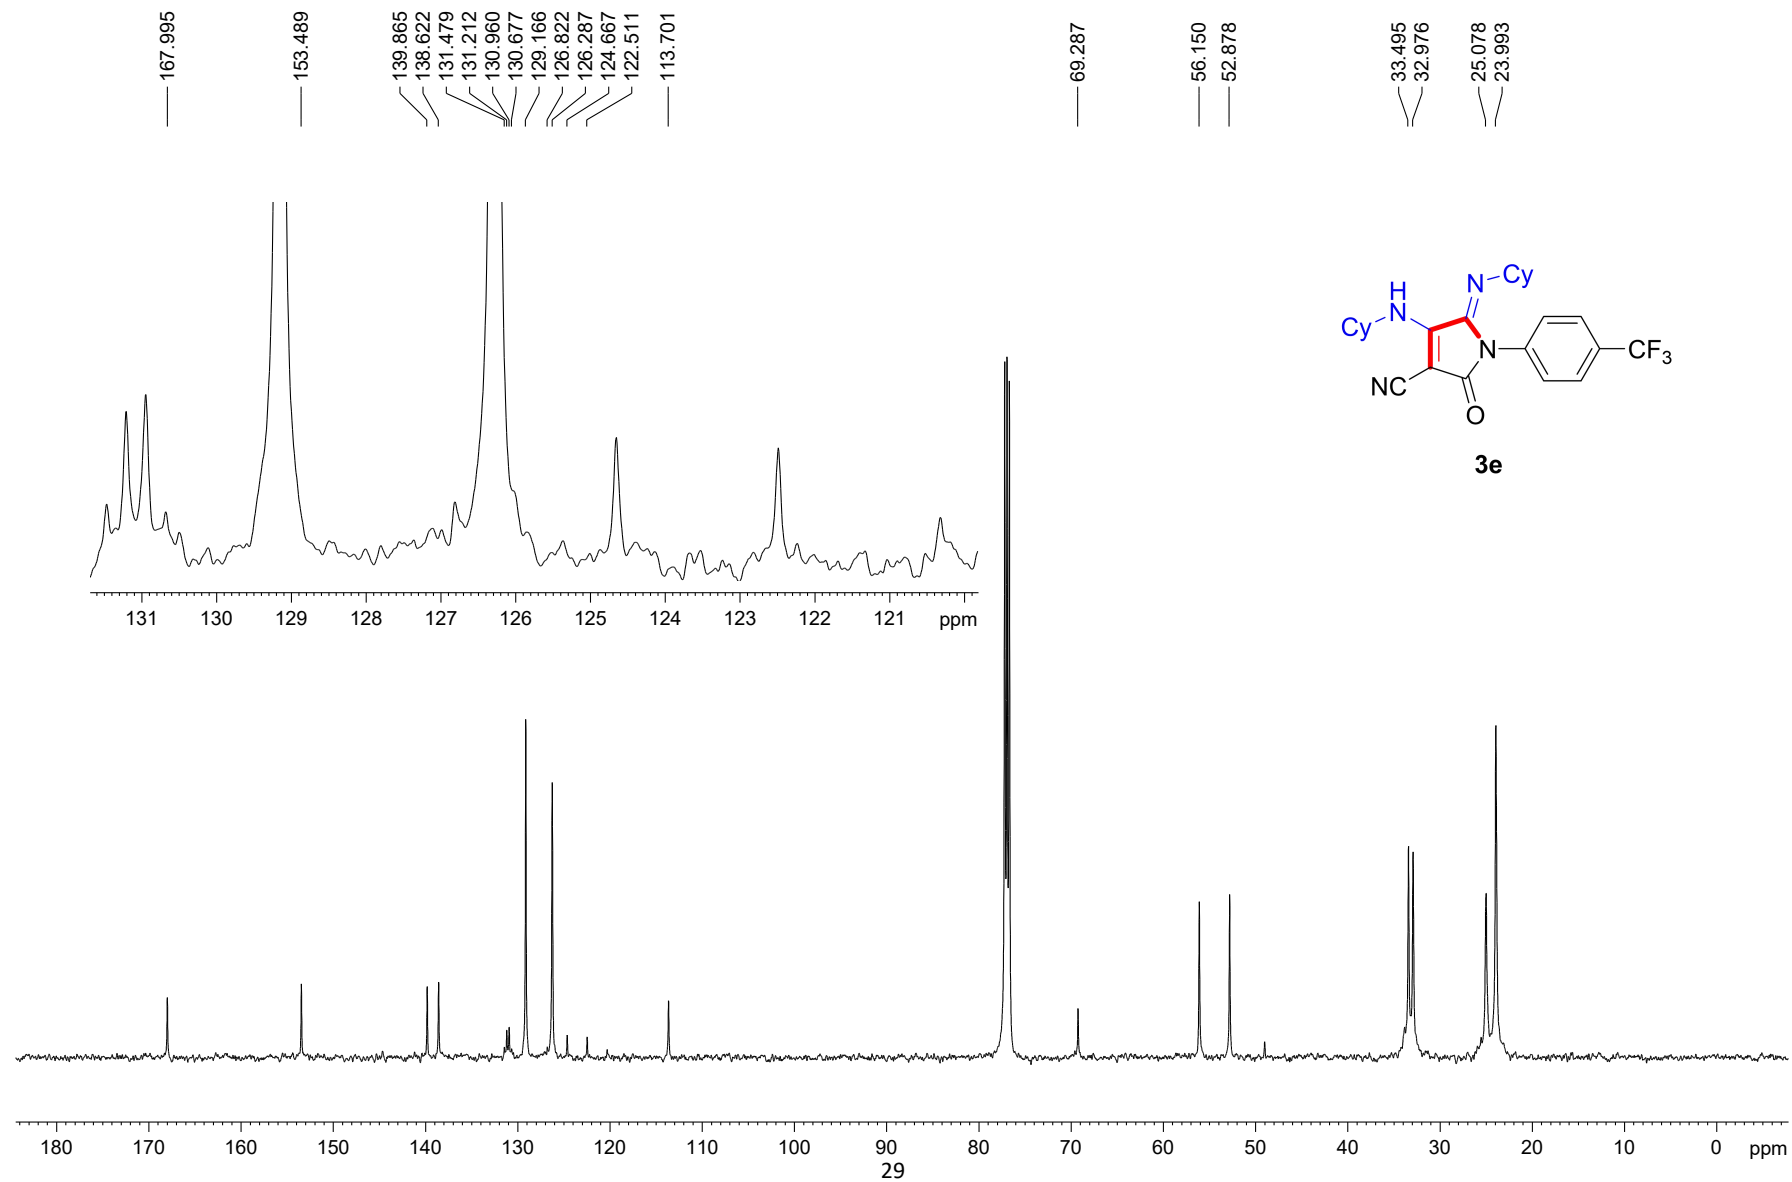

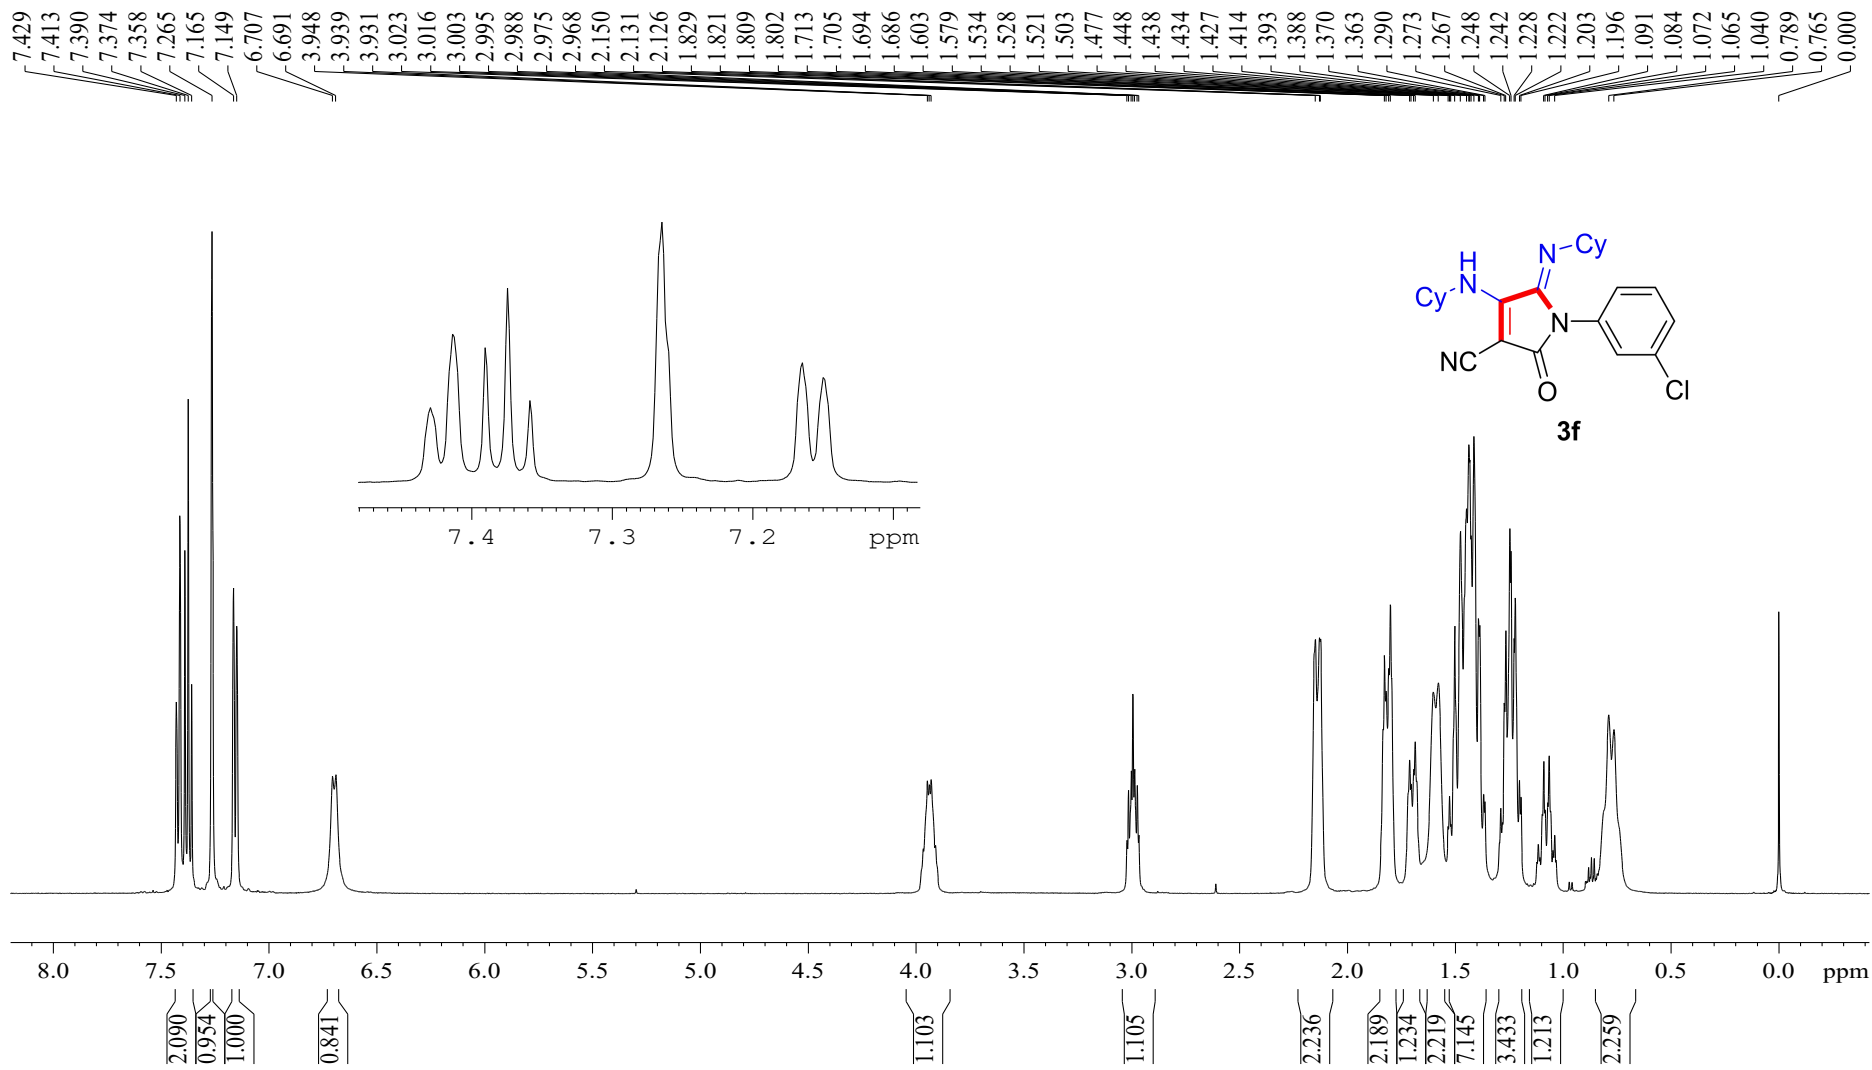

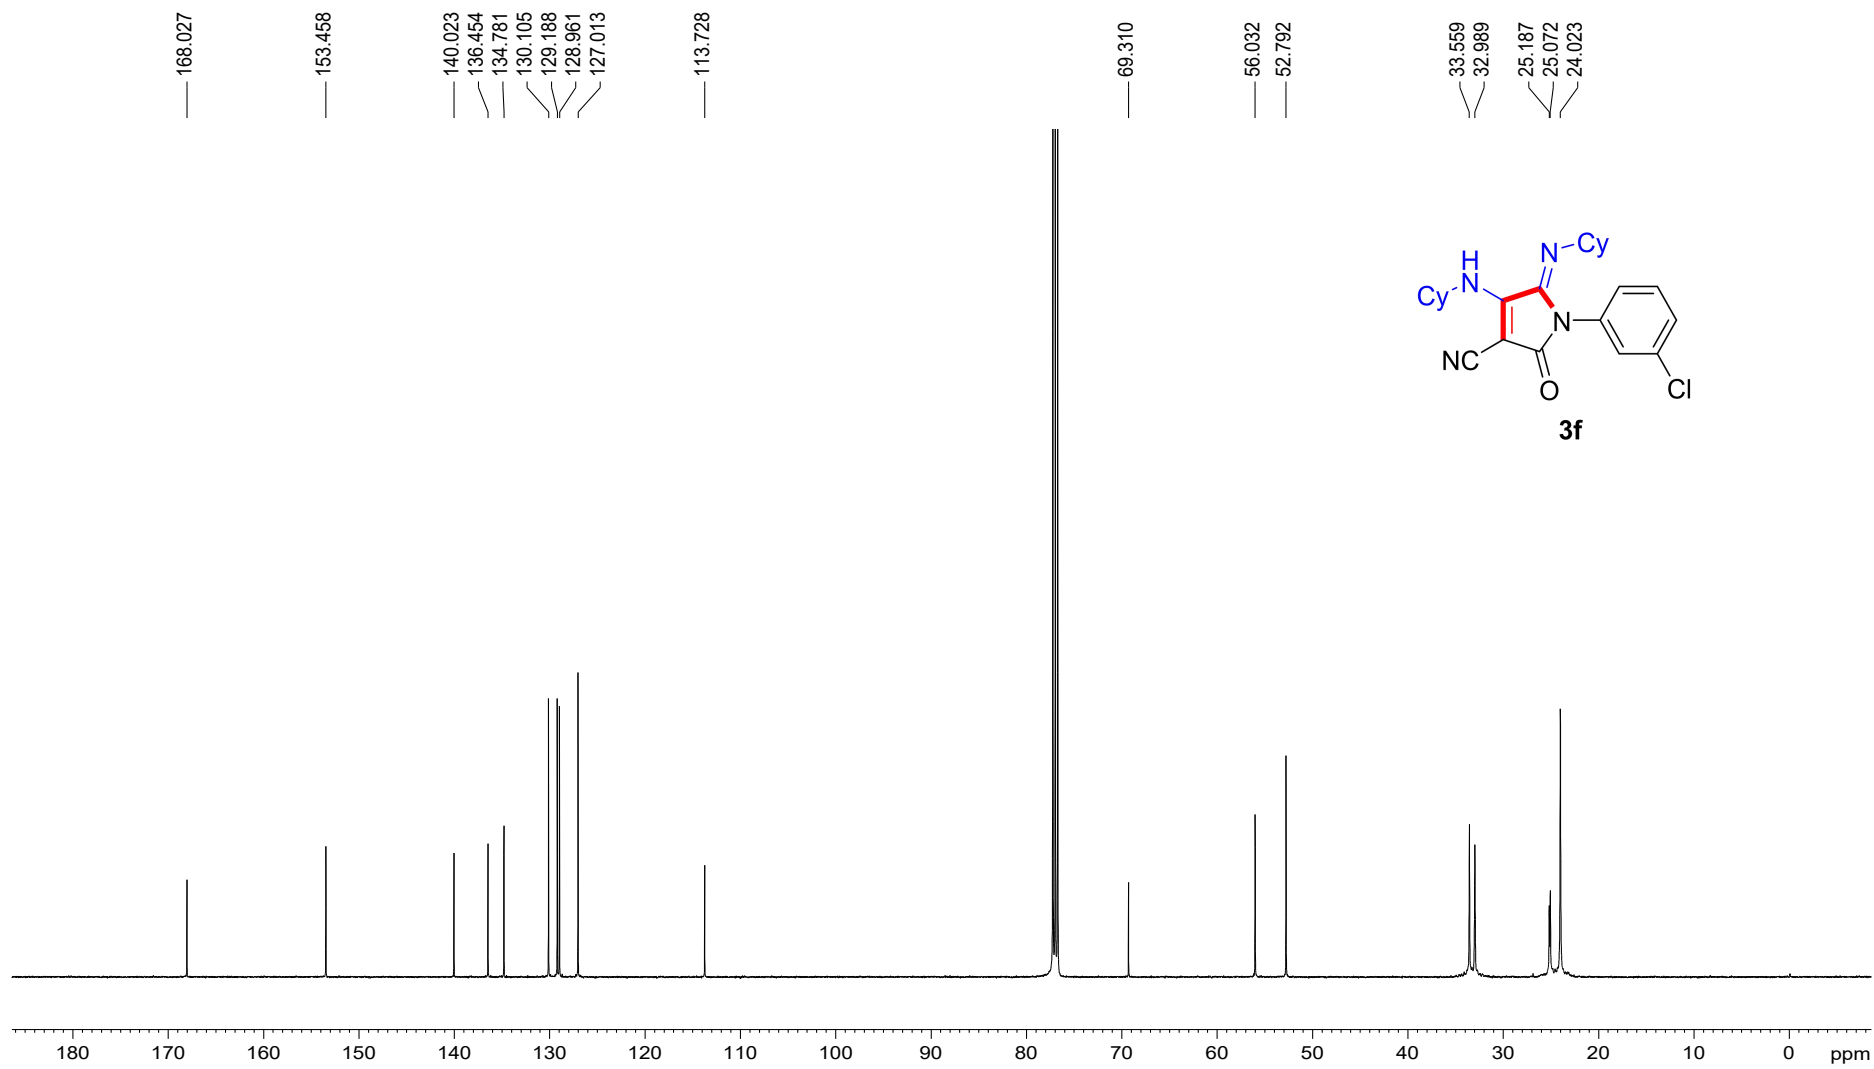

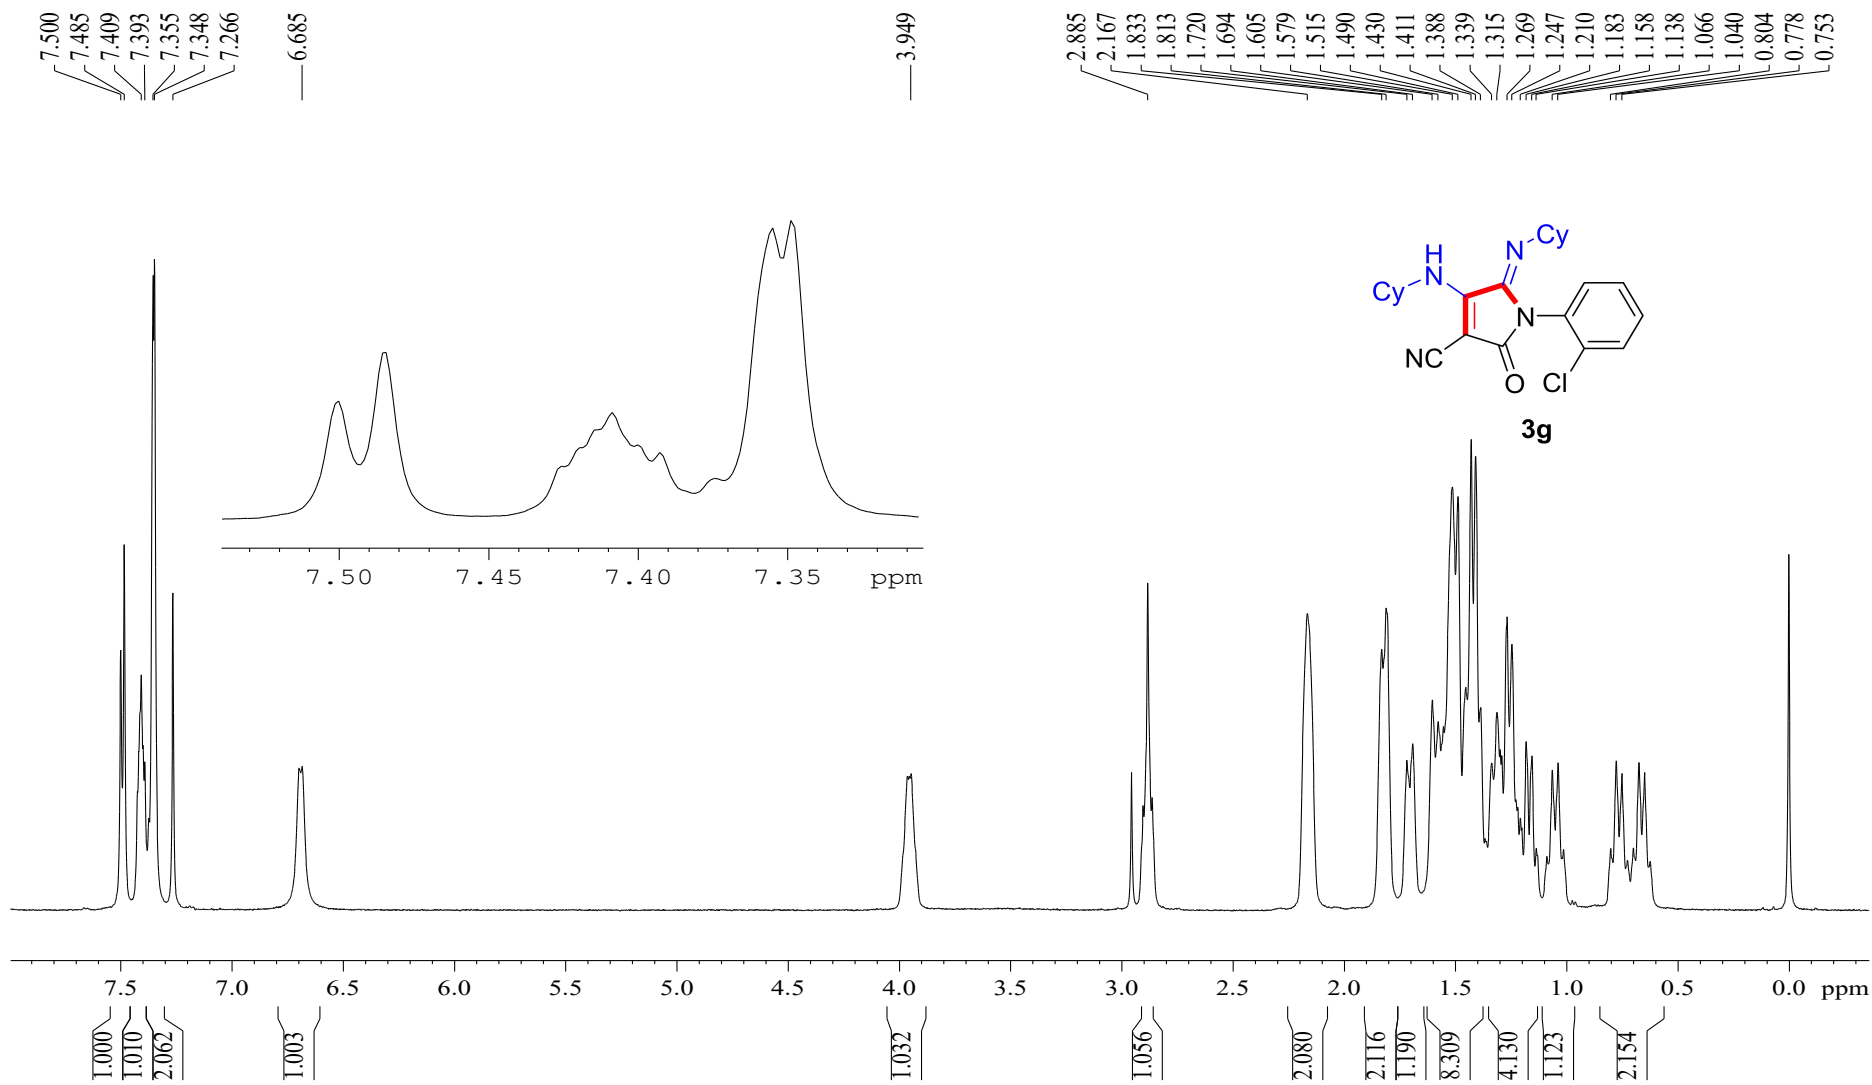



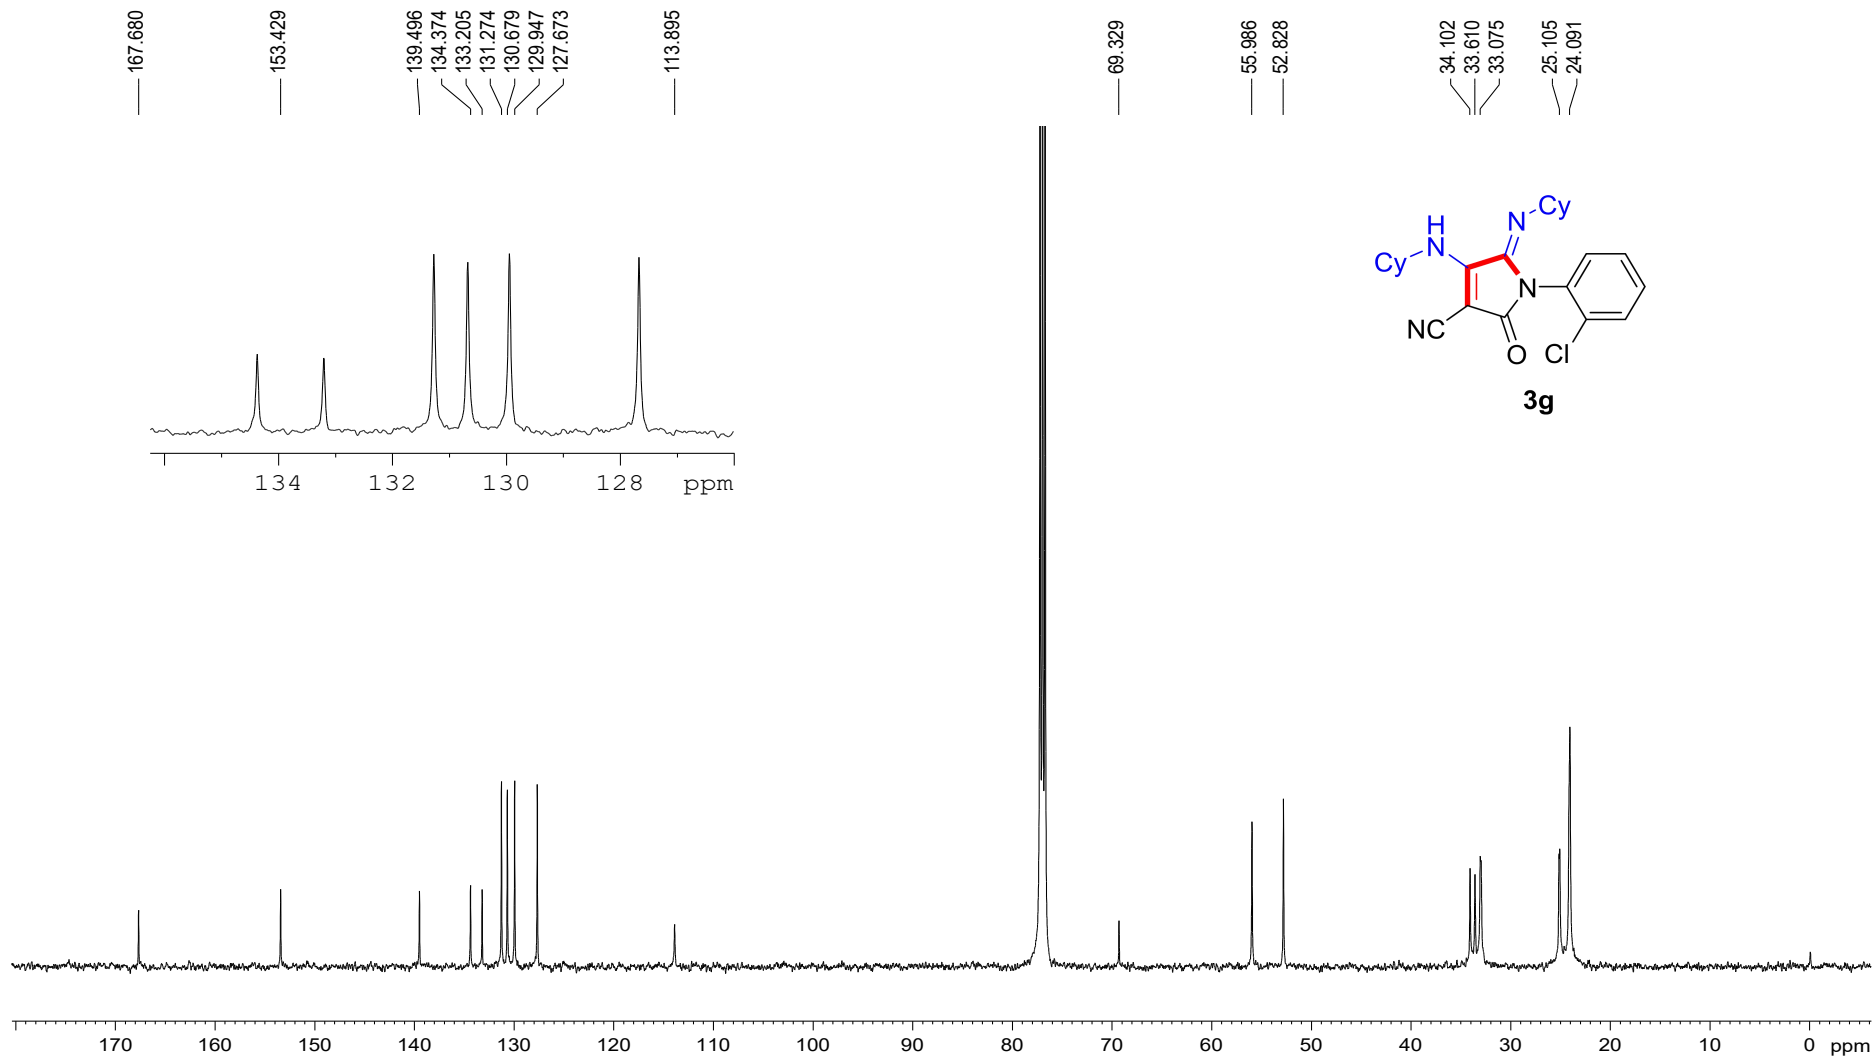

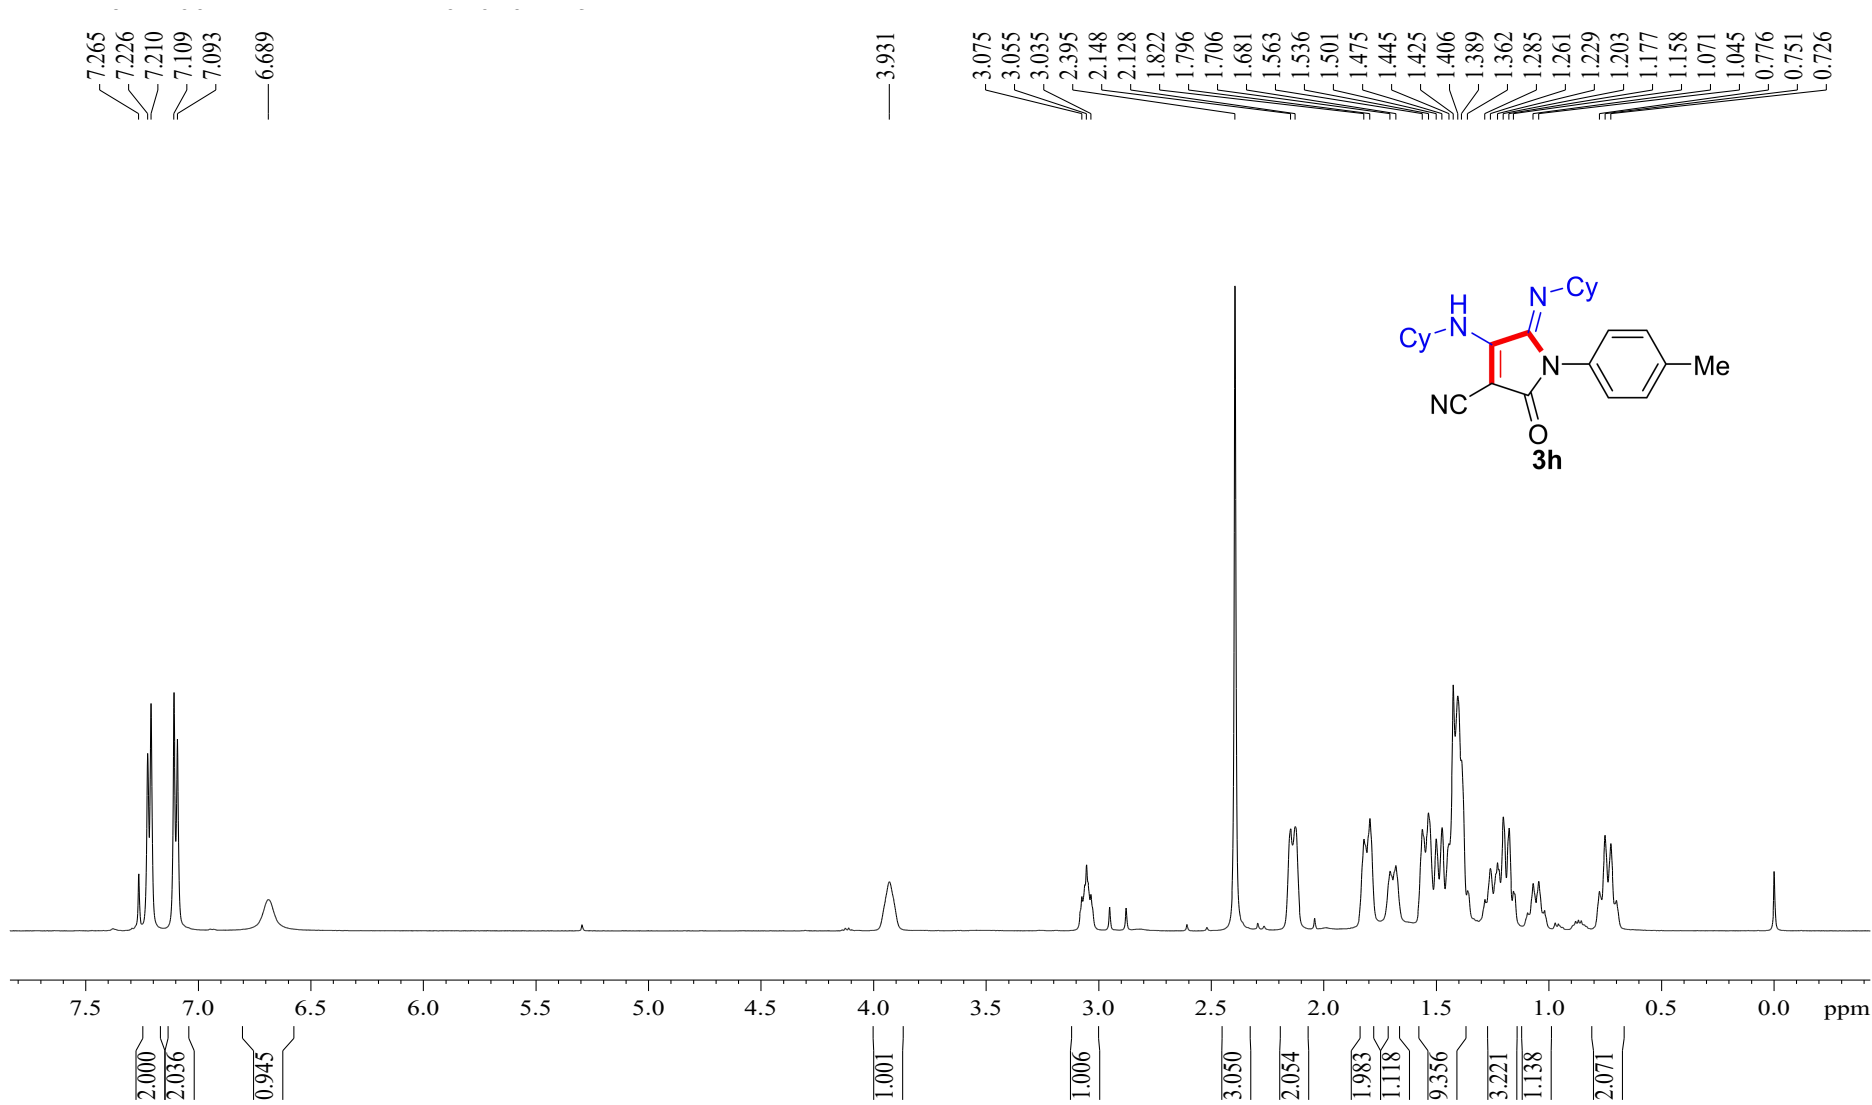

NJB-160727 13C 1D 2016 07 29

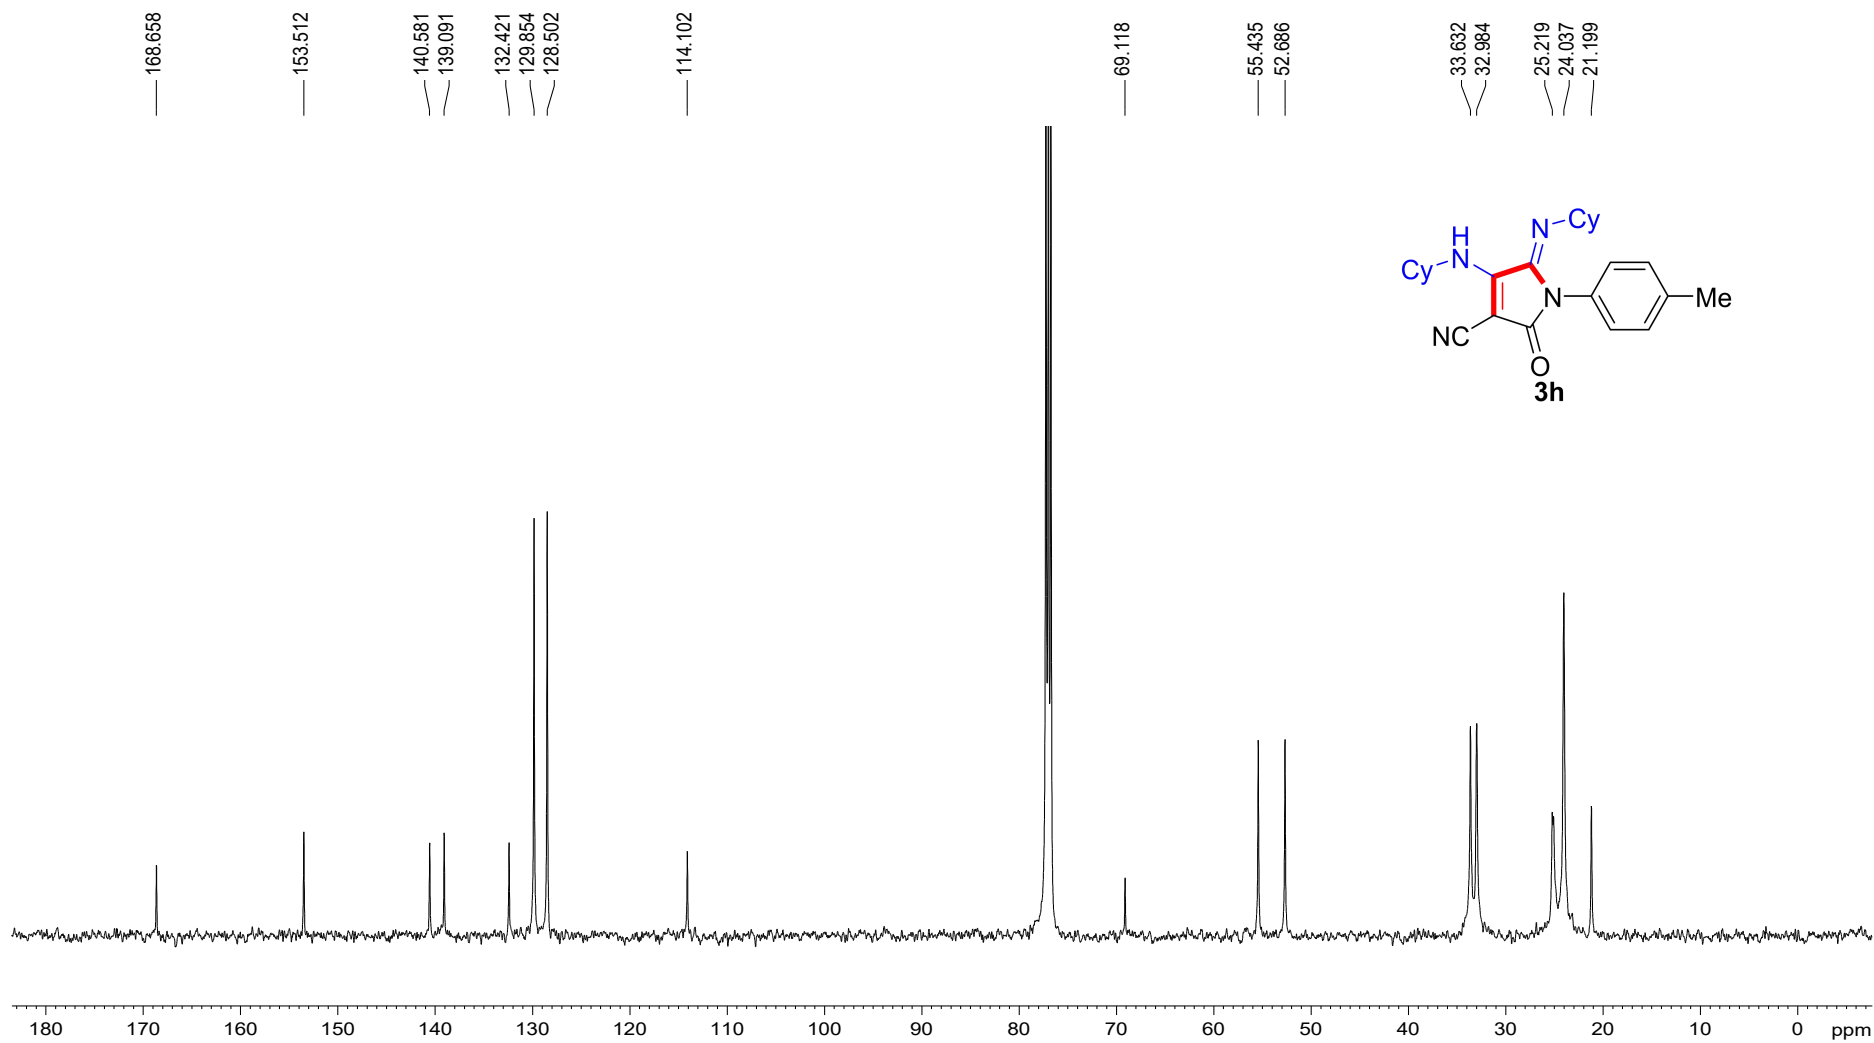

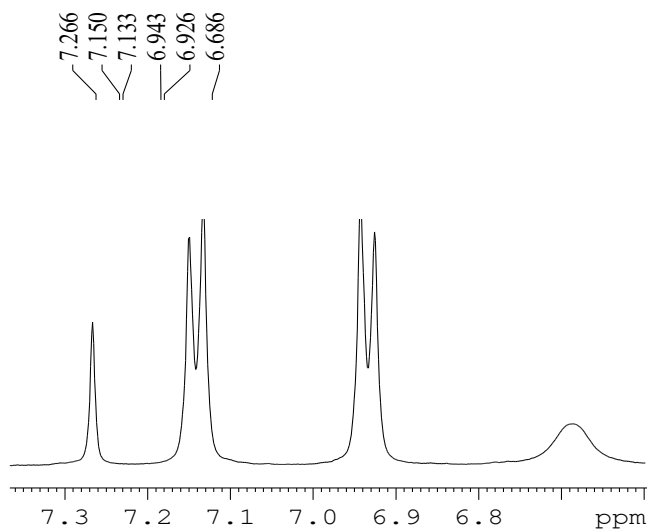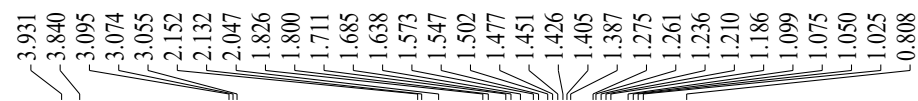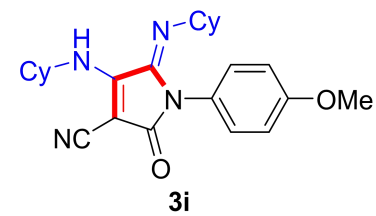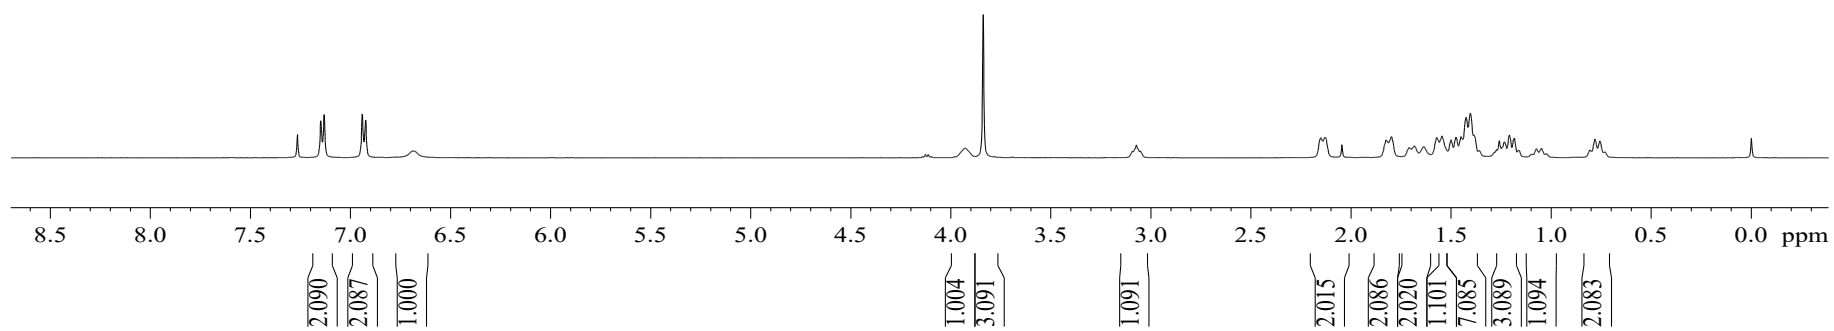

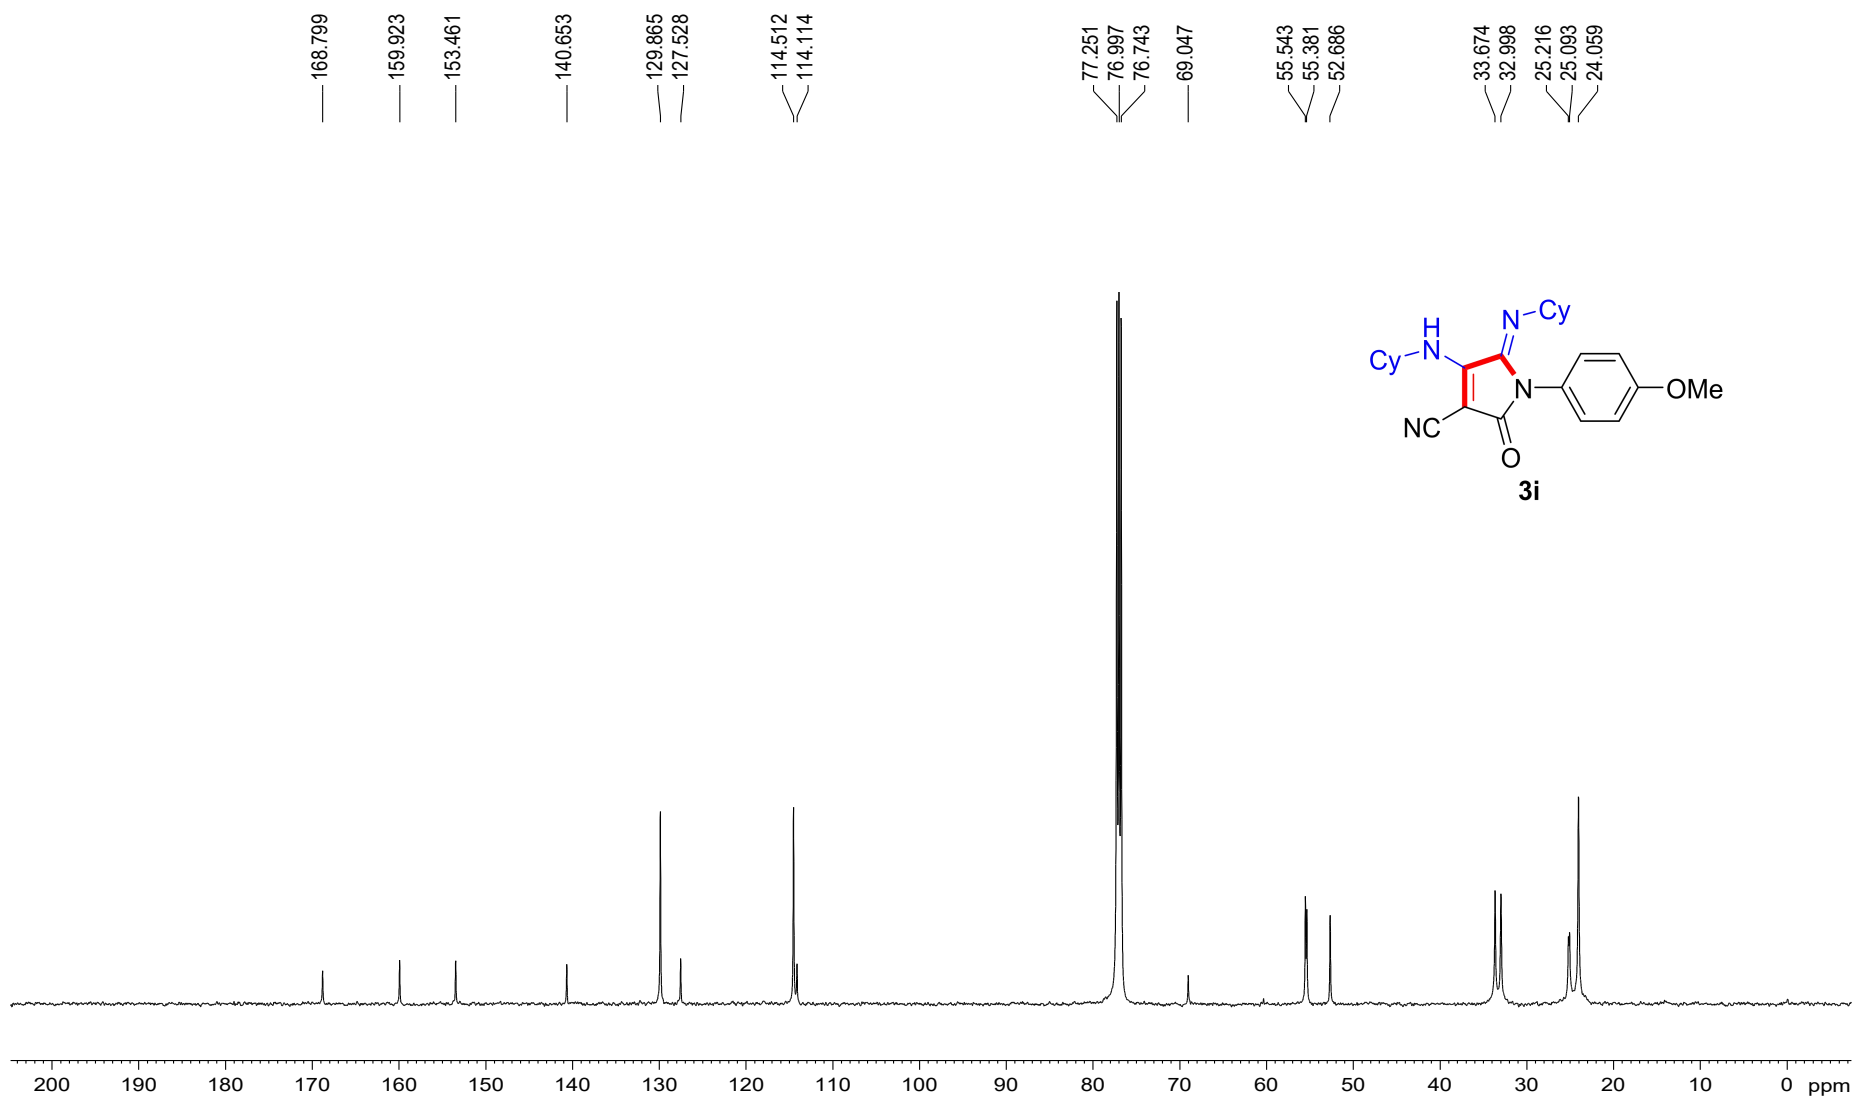

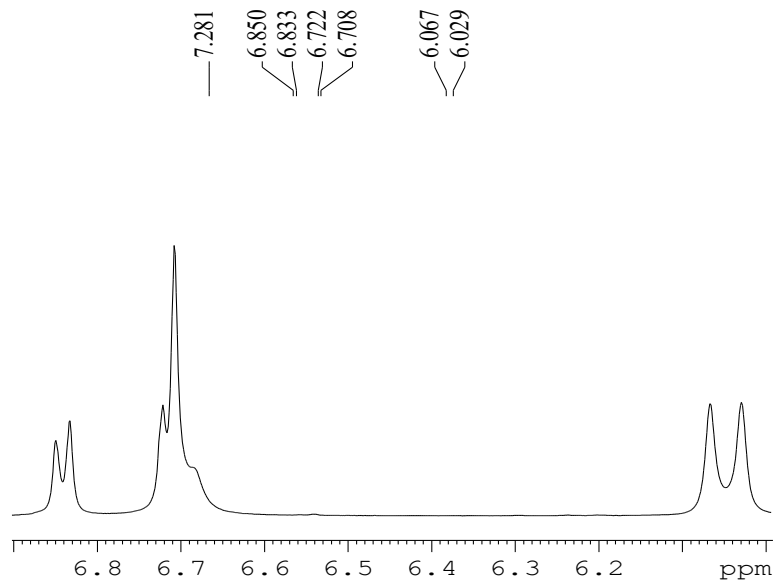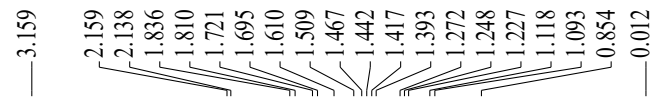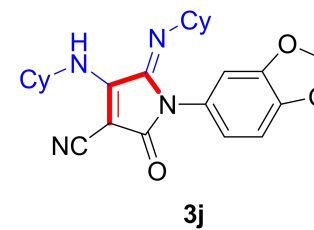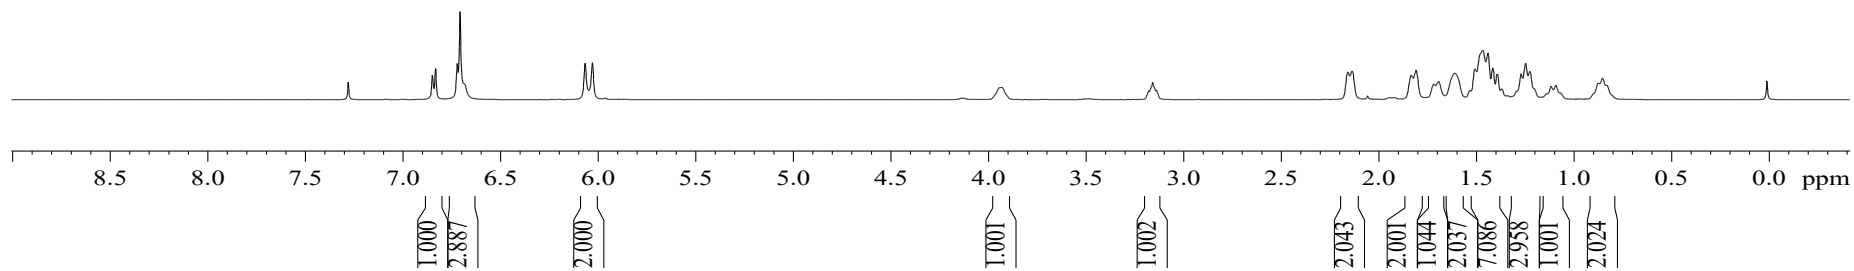

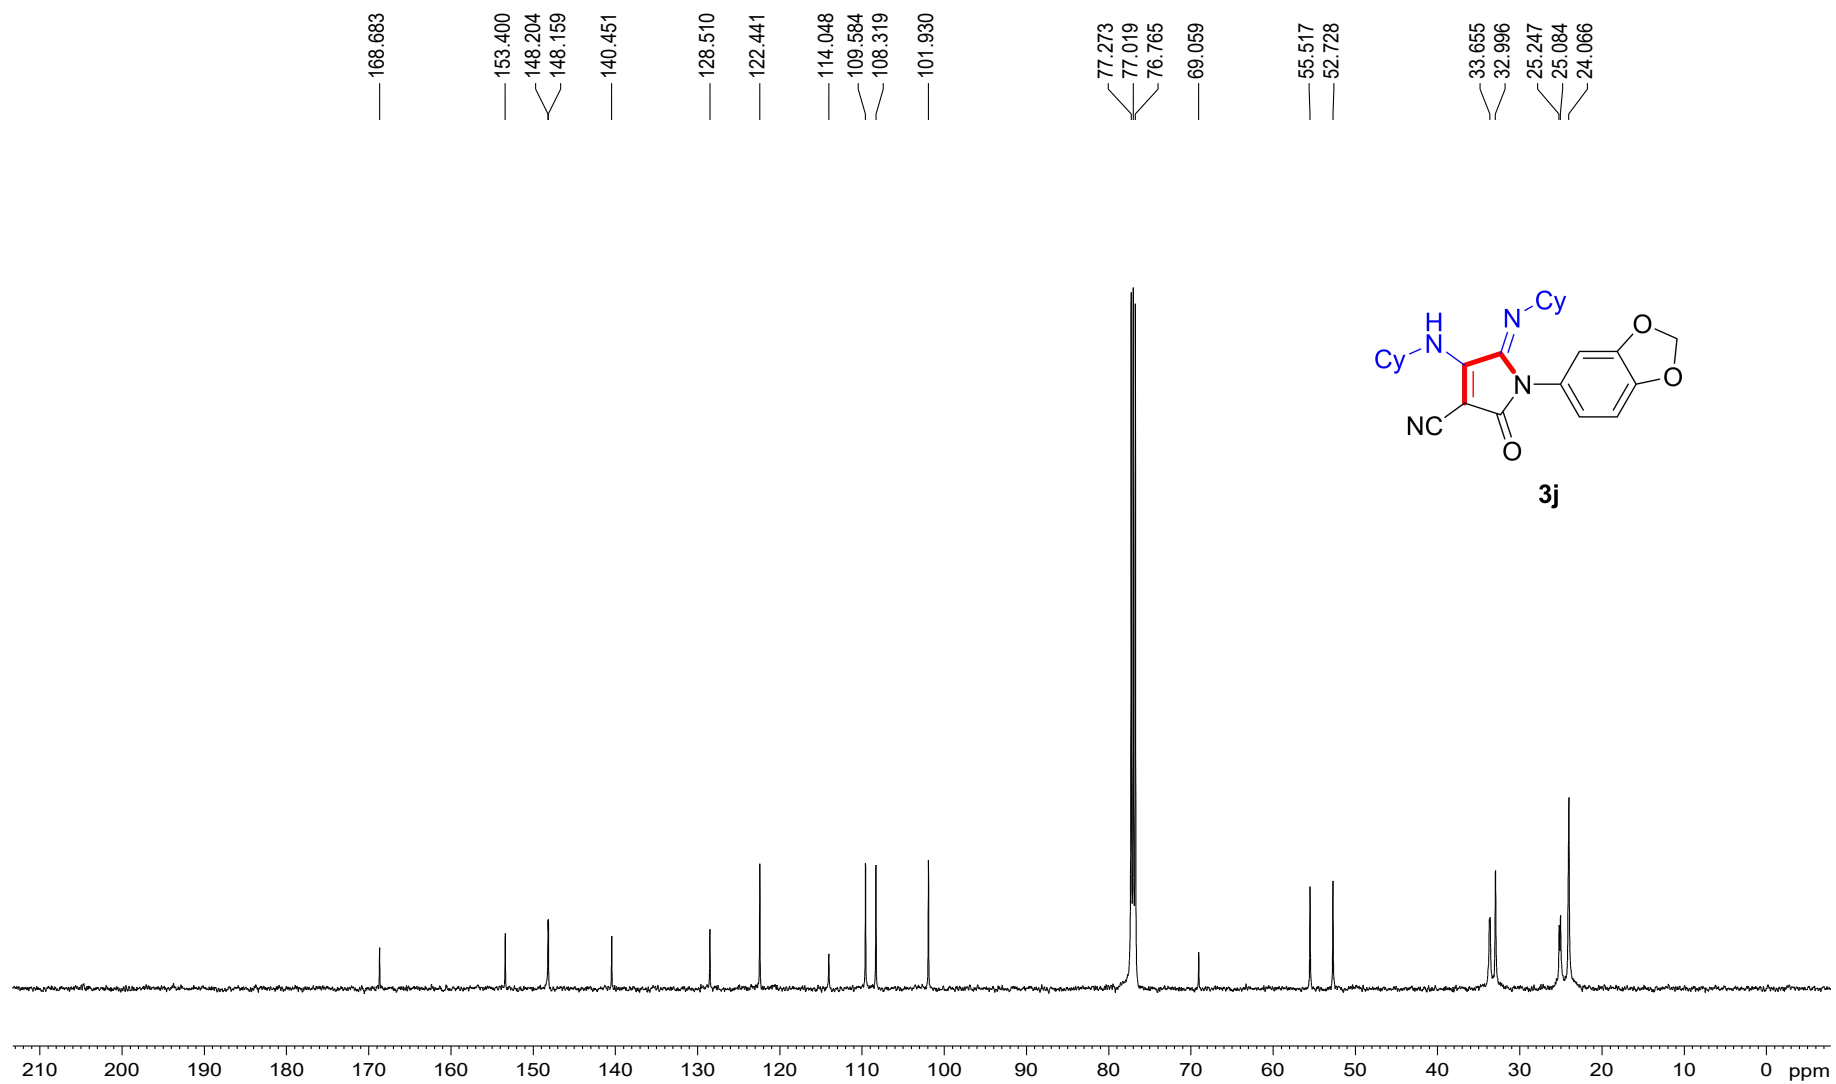

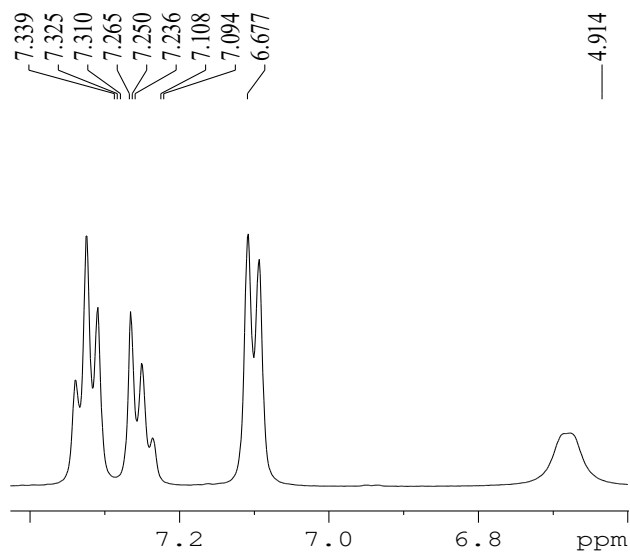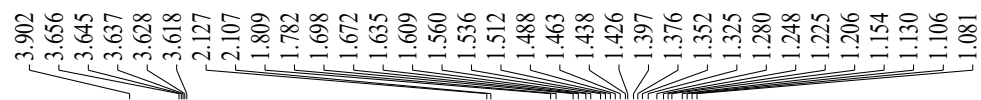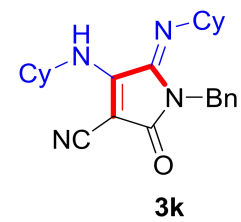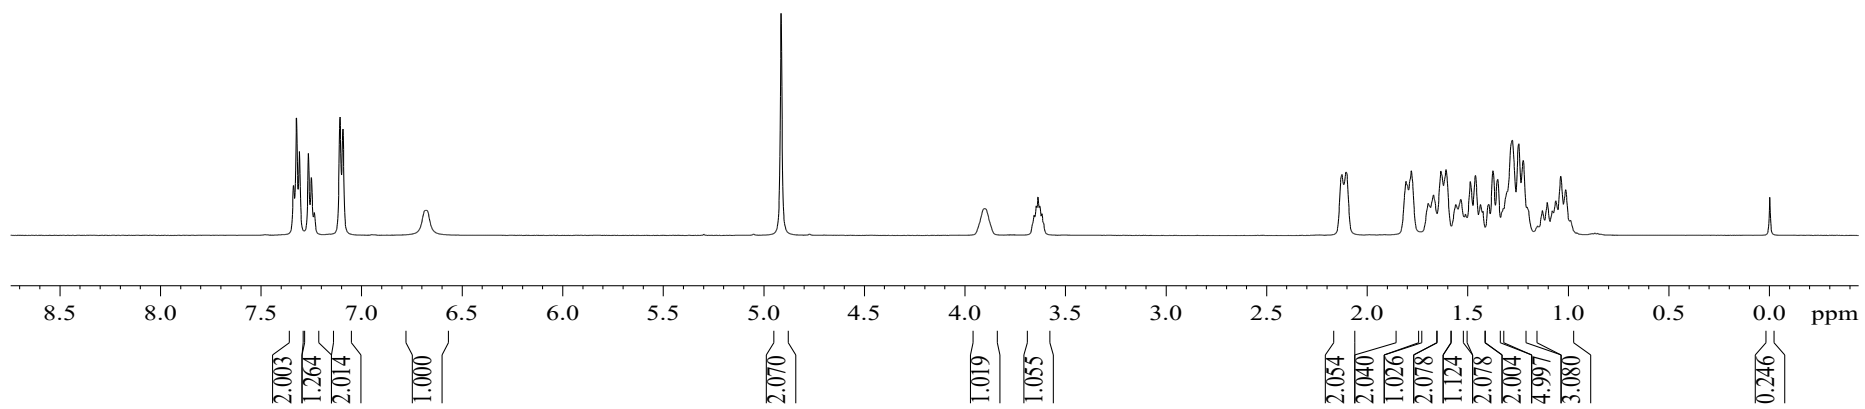



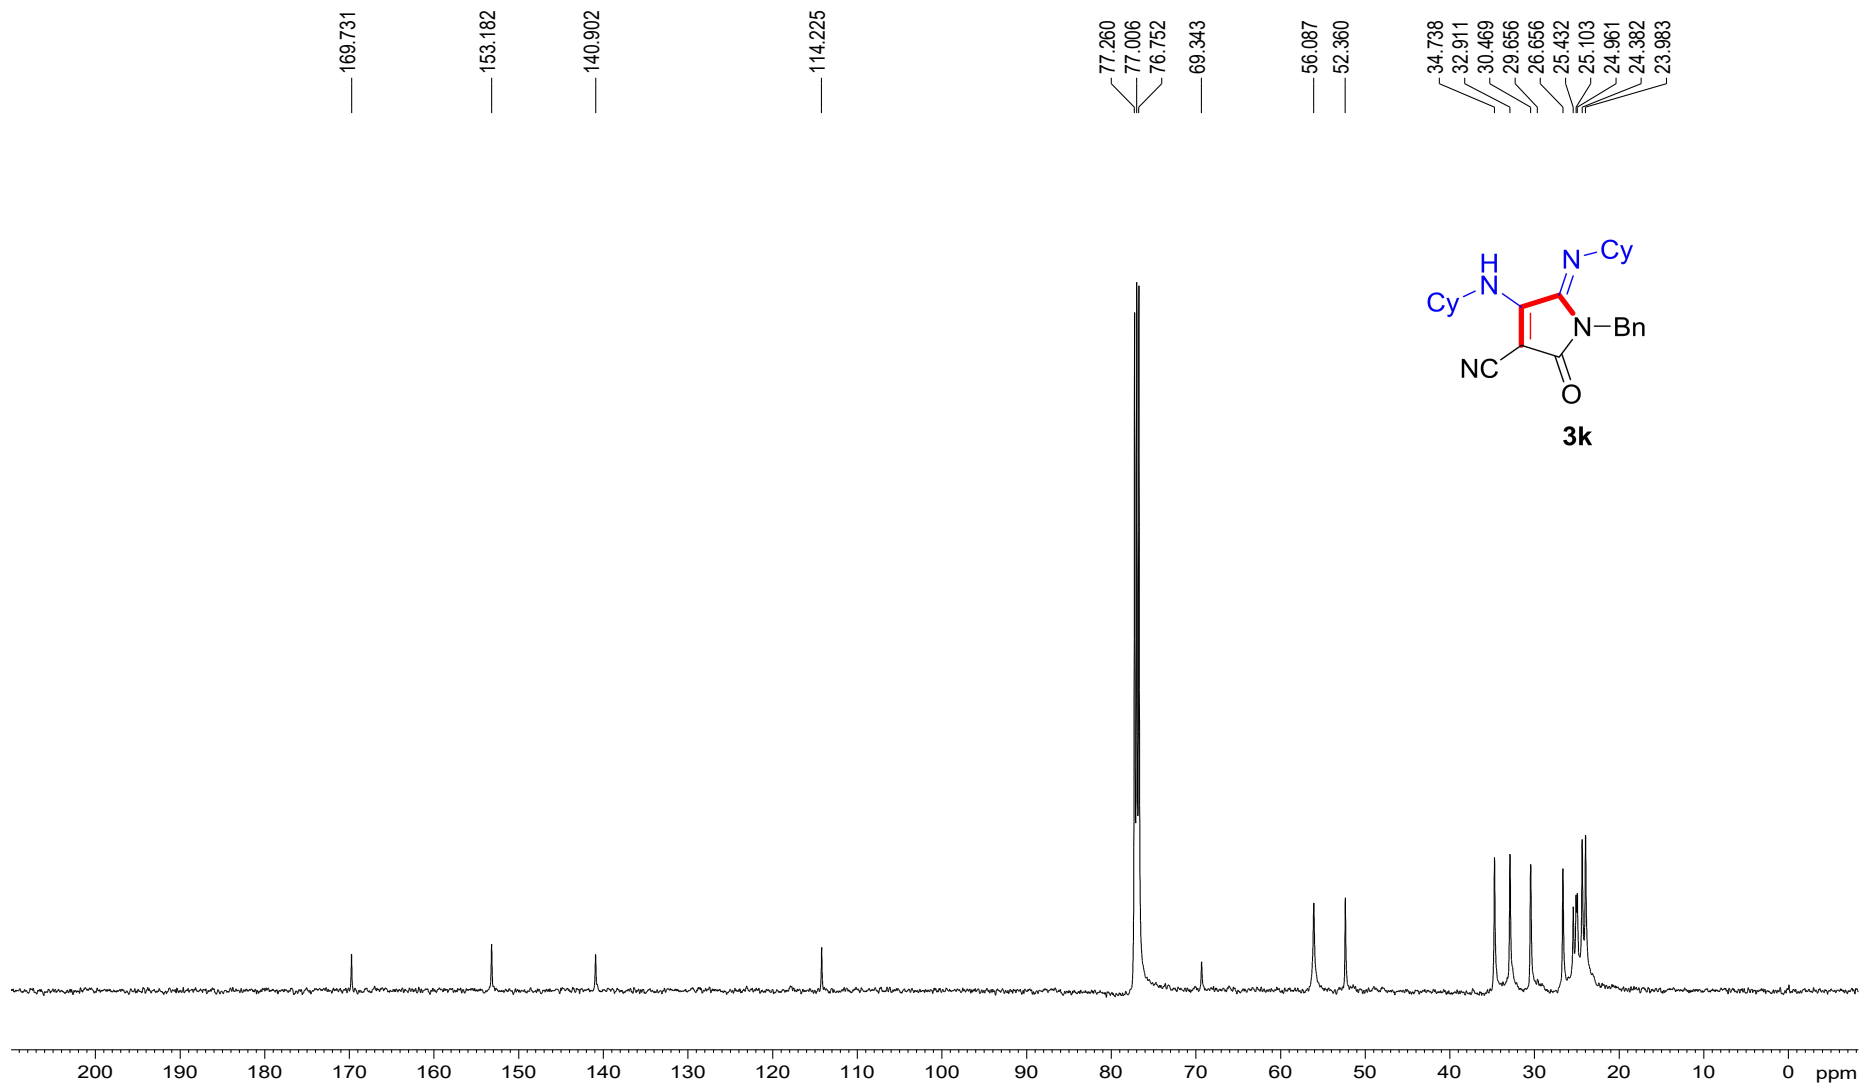

7.921  
7.915  
7.910  
7.903  
7.634  
7.628  
7.541  
7.535  
7.528  
7.524  
7.510  
7.494  
7.423  
7.408  
7.266  
6.755

4.013

2.600  
2.580  
2.560  
2.208  
1.837  
1.737  
1.711  
1.563  
1.540  
1.516  
1.489  
1.464  
1.442  
1.425  
1.308  
1.284  
1.255  
1.230  
1.126  
1.107  
1.081  
1.062  
1.041  
1.020  
0.996  
0.976  
0.934  
0.908  
0.882

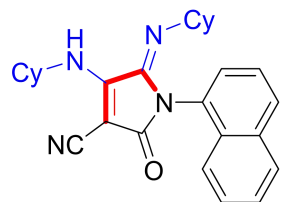

3I

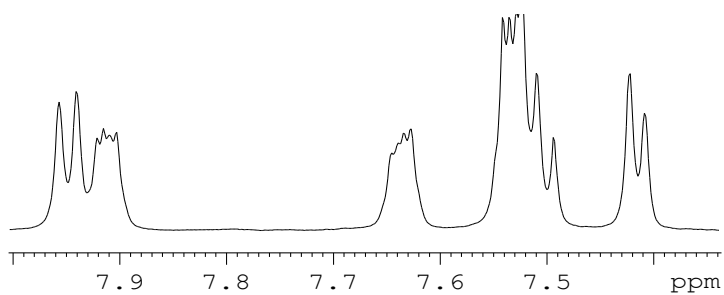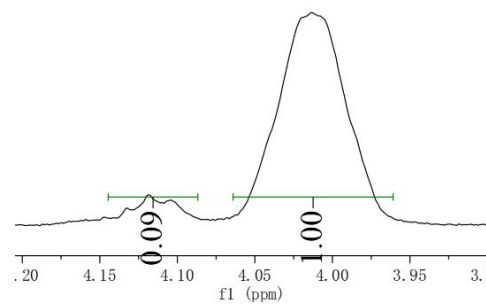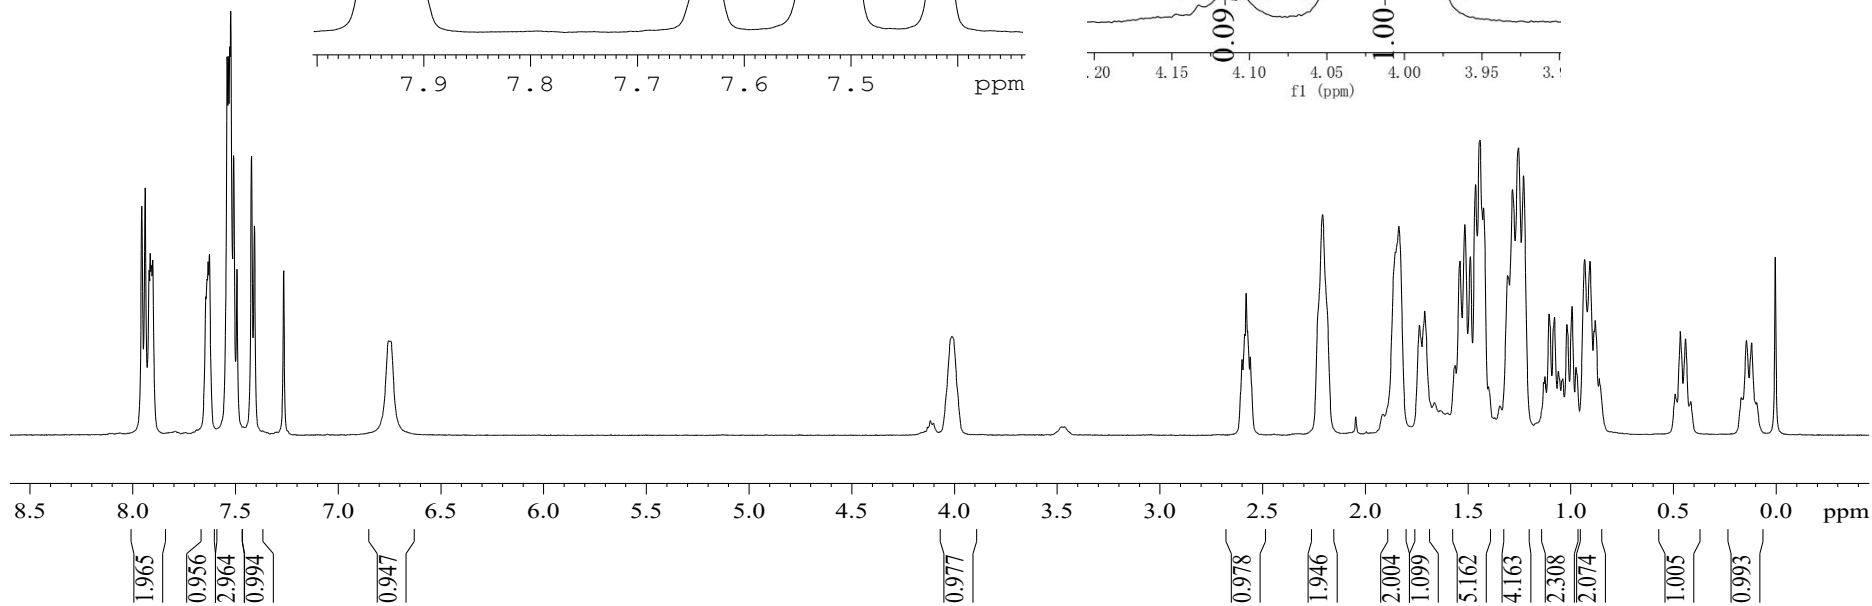

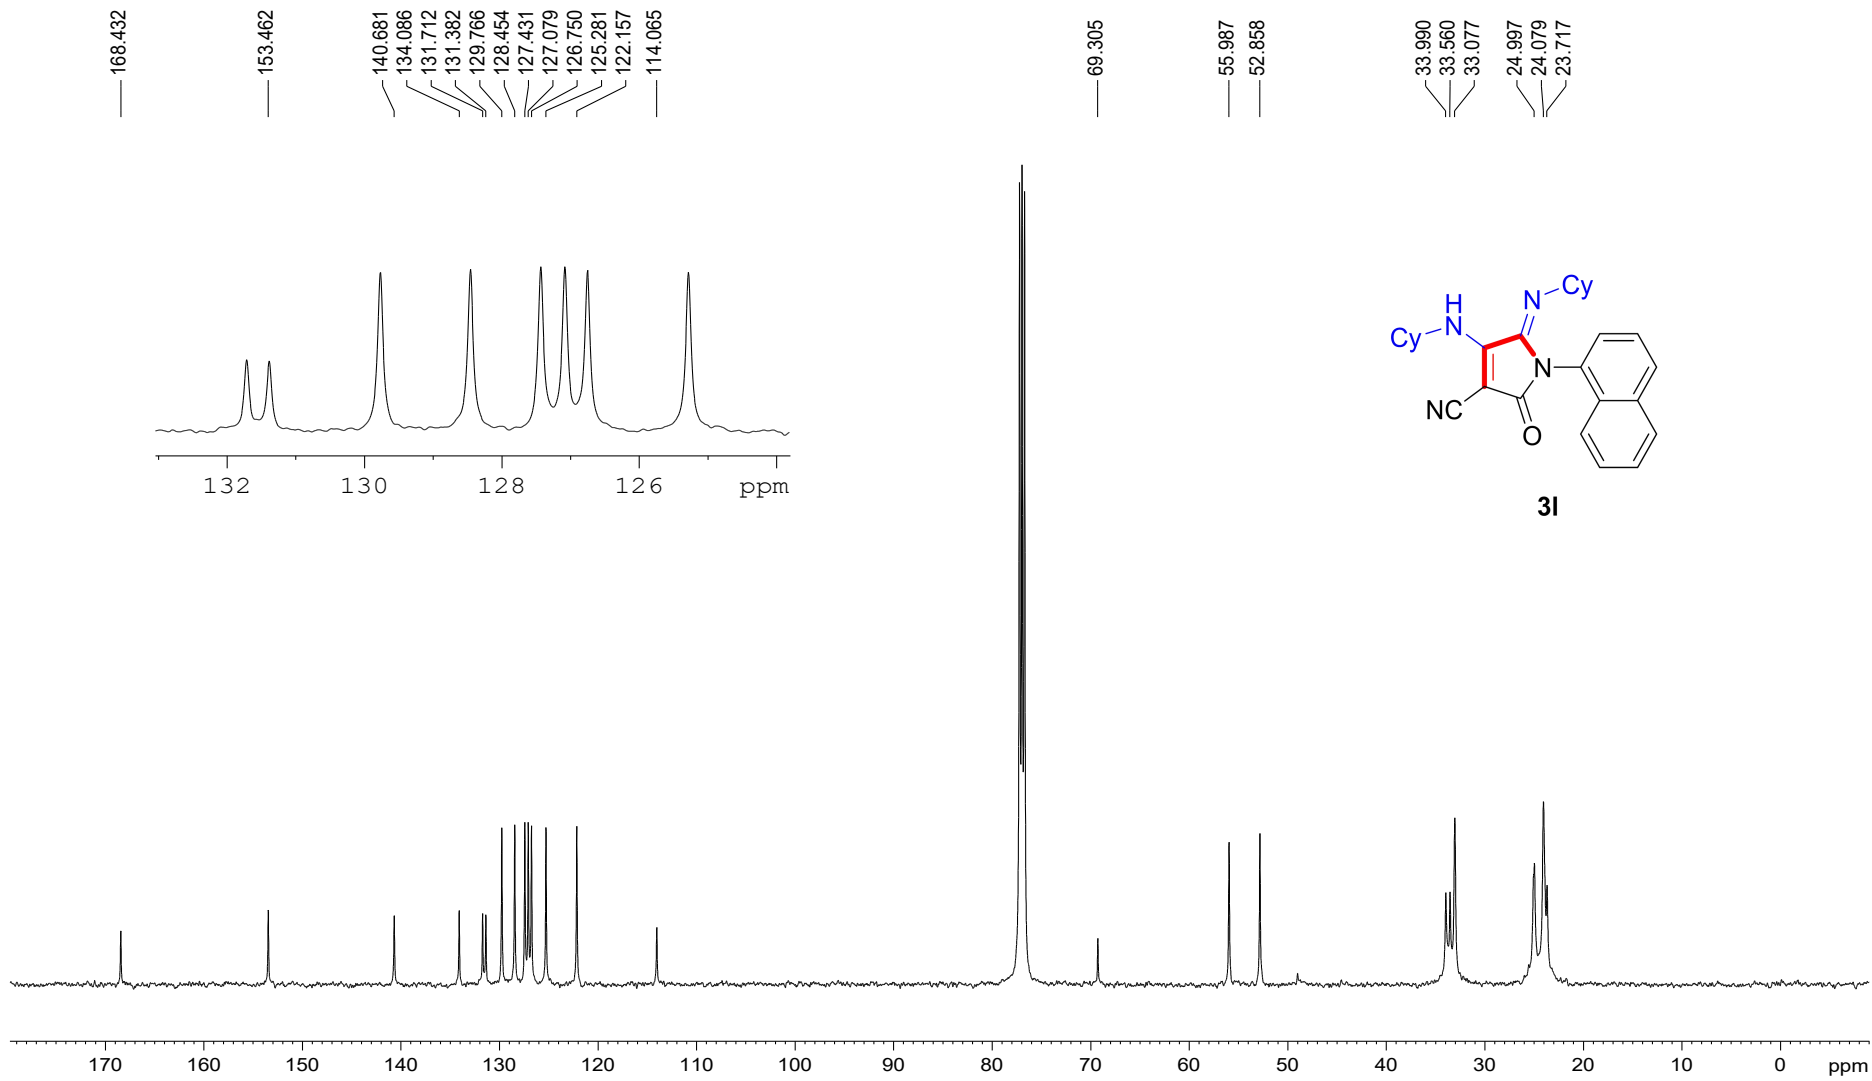

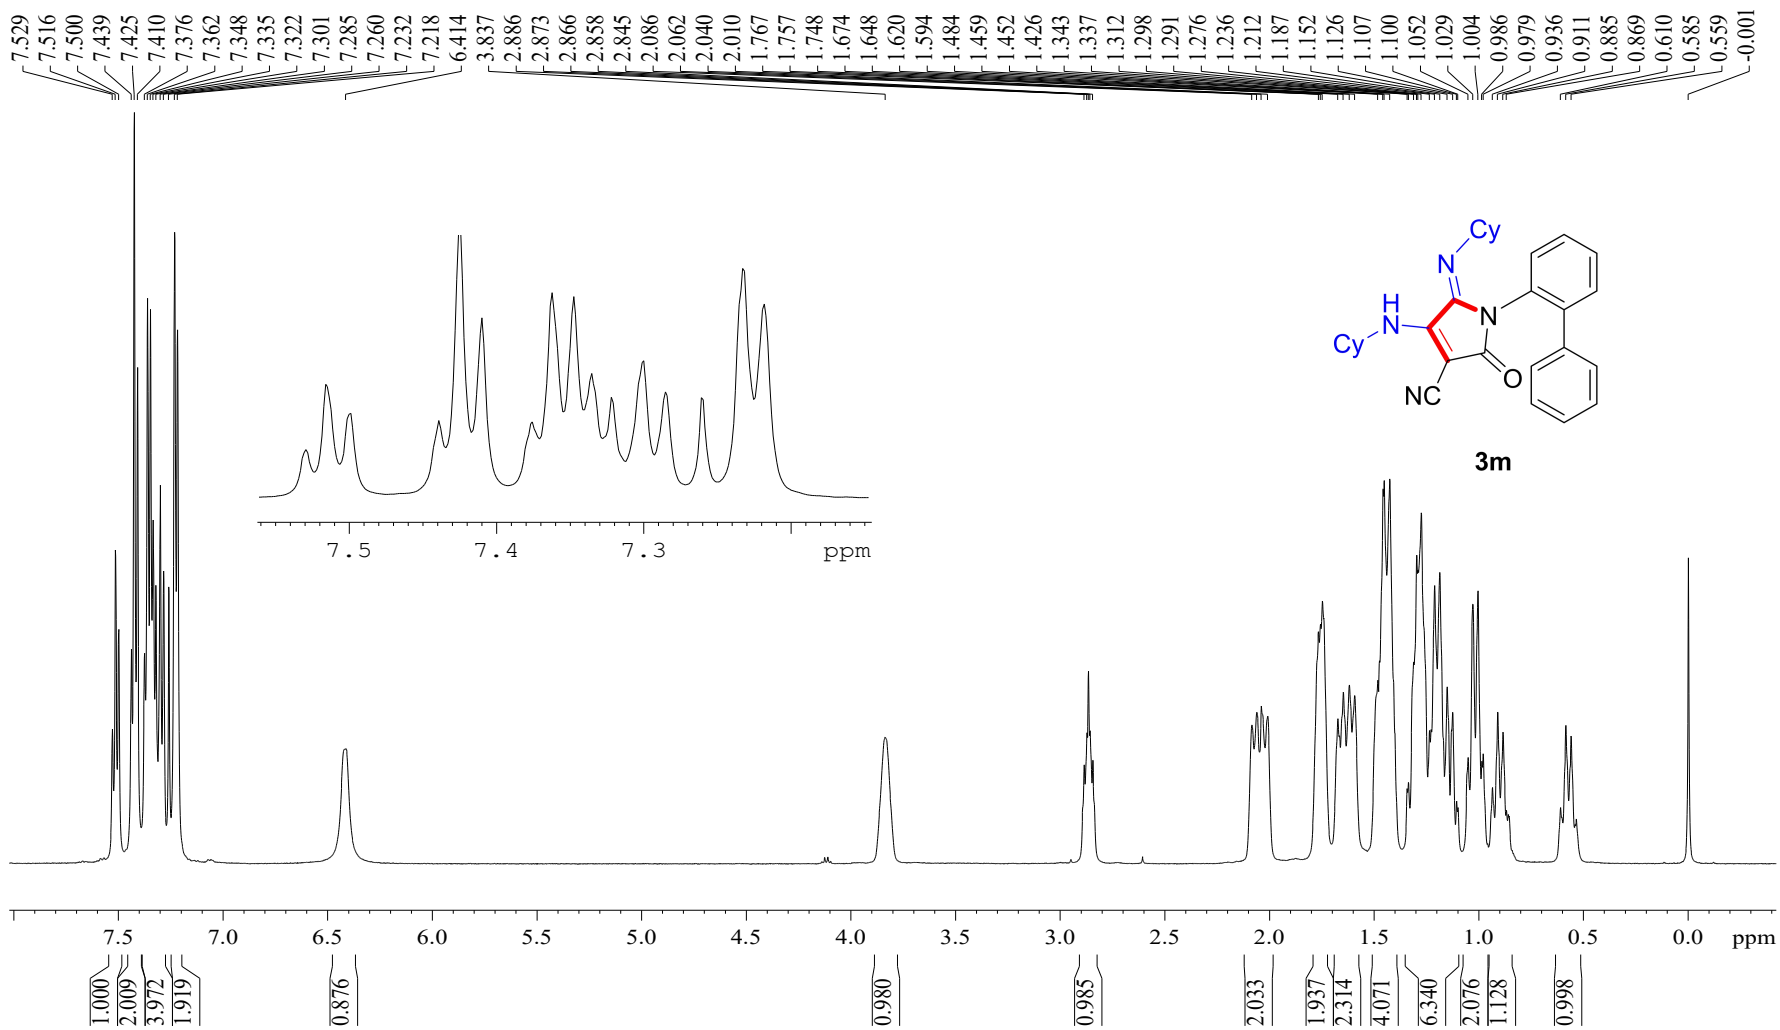

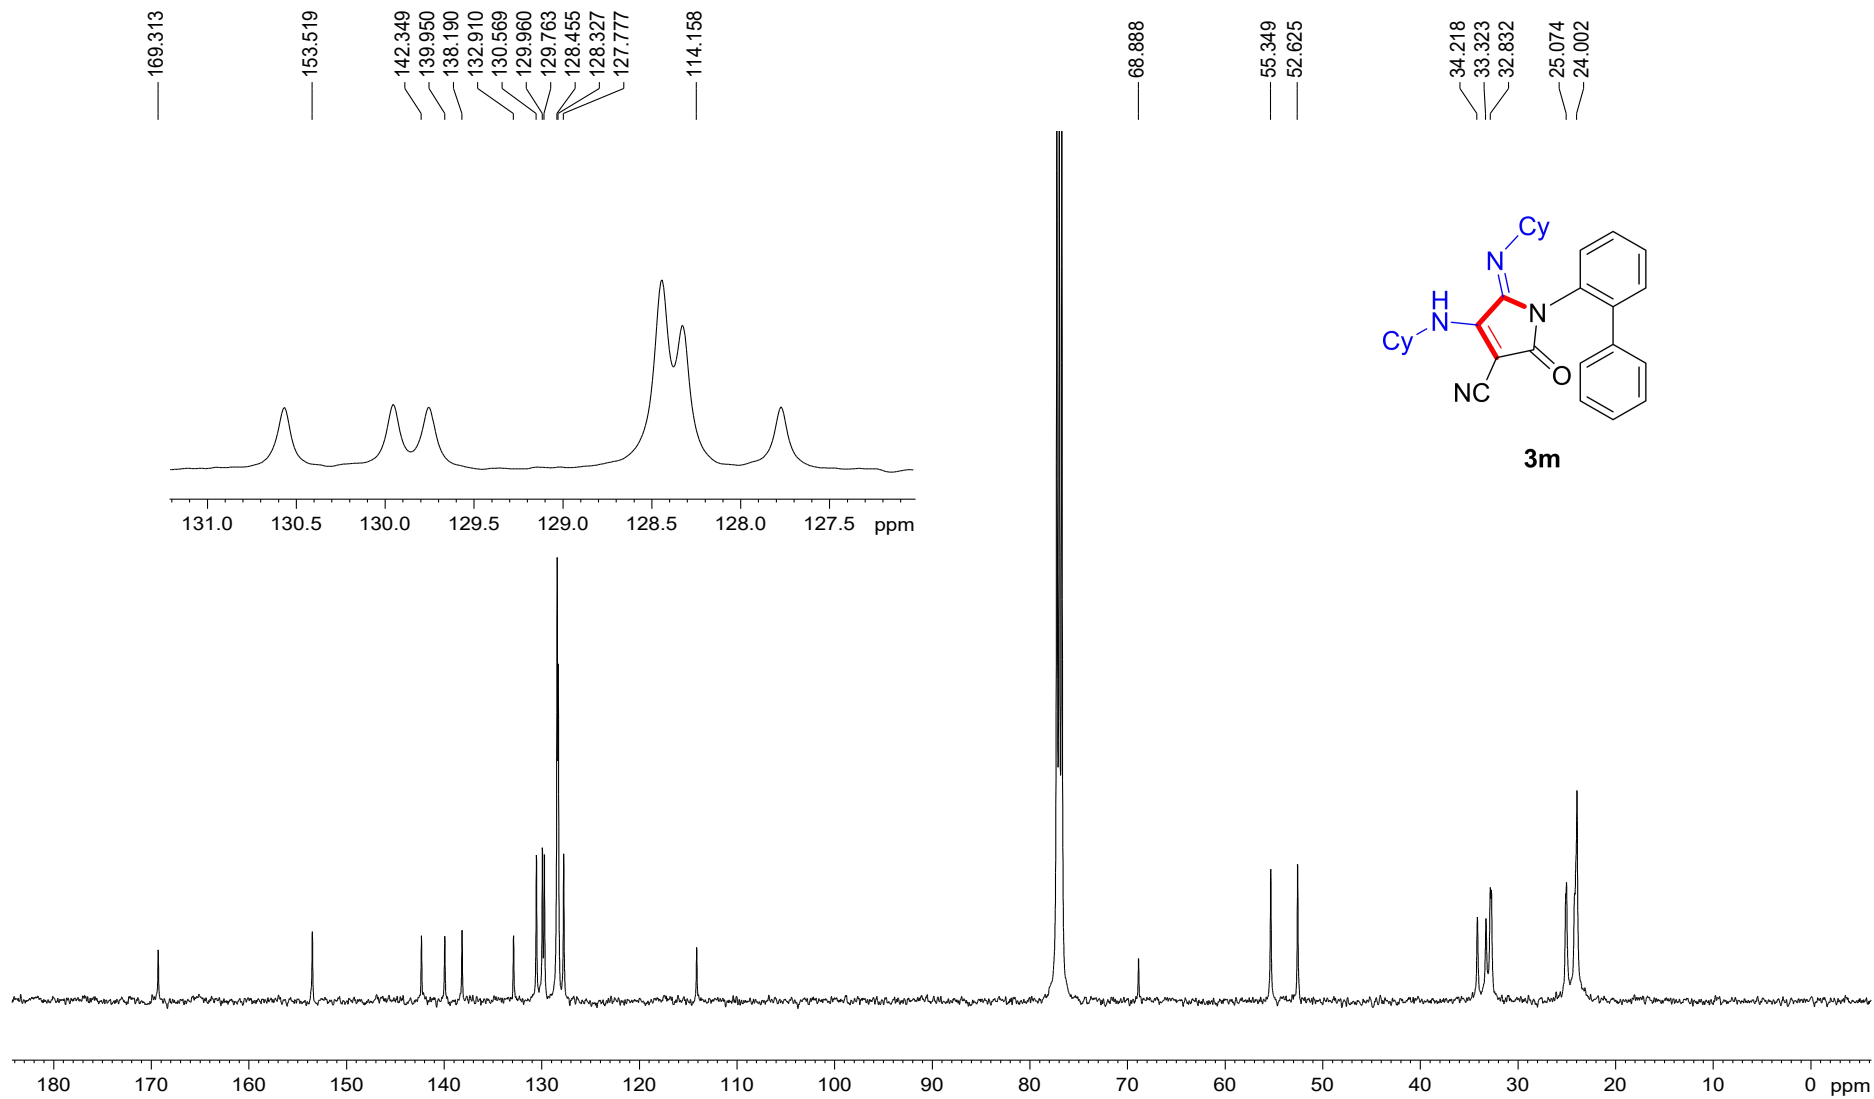

8.500  
8.493  
7.858  
7.843  
7.828  
7.387  
7.372  
7.351  
7.337  
7.327  
7.265  
6.747

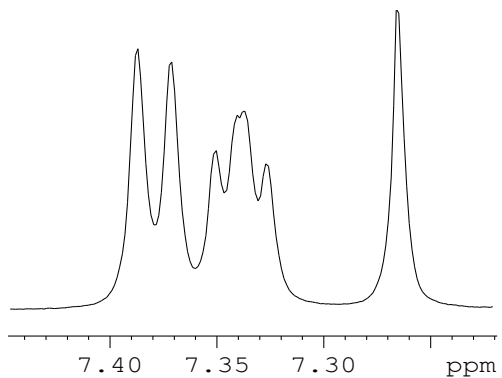

3.944  
2.857  
2.837  
2.817  
2.146  
2.125  
1.938  
1.918  
1.826  
1.799  
1.706  
1.683  
1.599  
1.573  
1.550  
1.525  
1.505  
1.478  
1.454  
1.430  
1.410  
1.385  
1.359  
1.333  
1.308  
1.280  
1.260  
1.236  
1.215  
1.158  
1.128

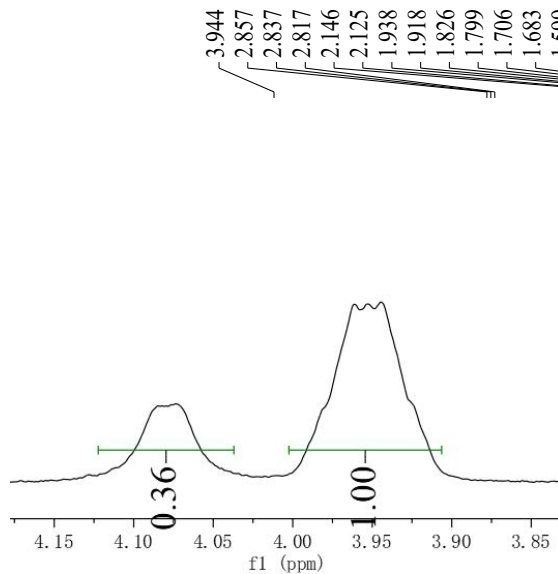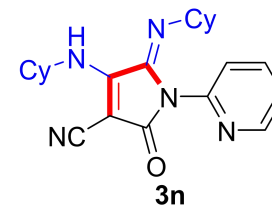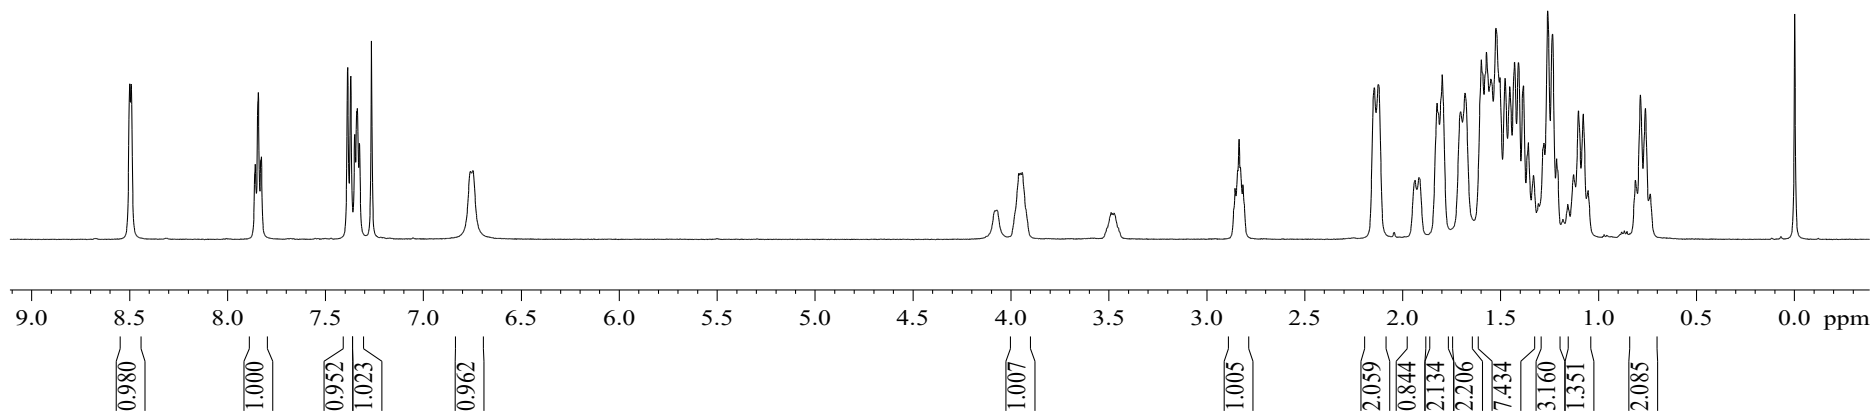

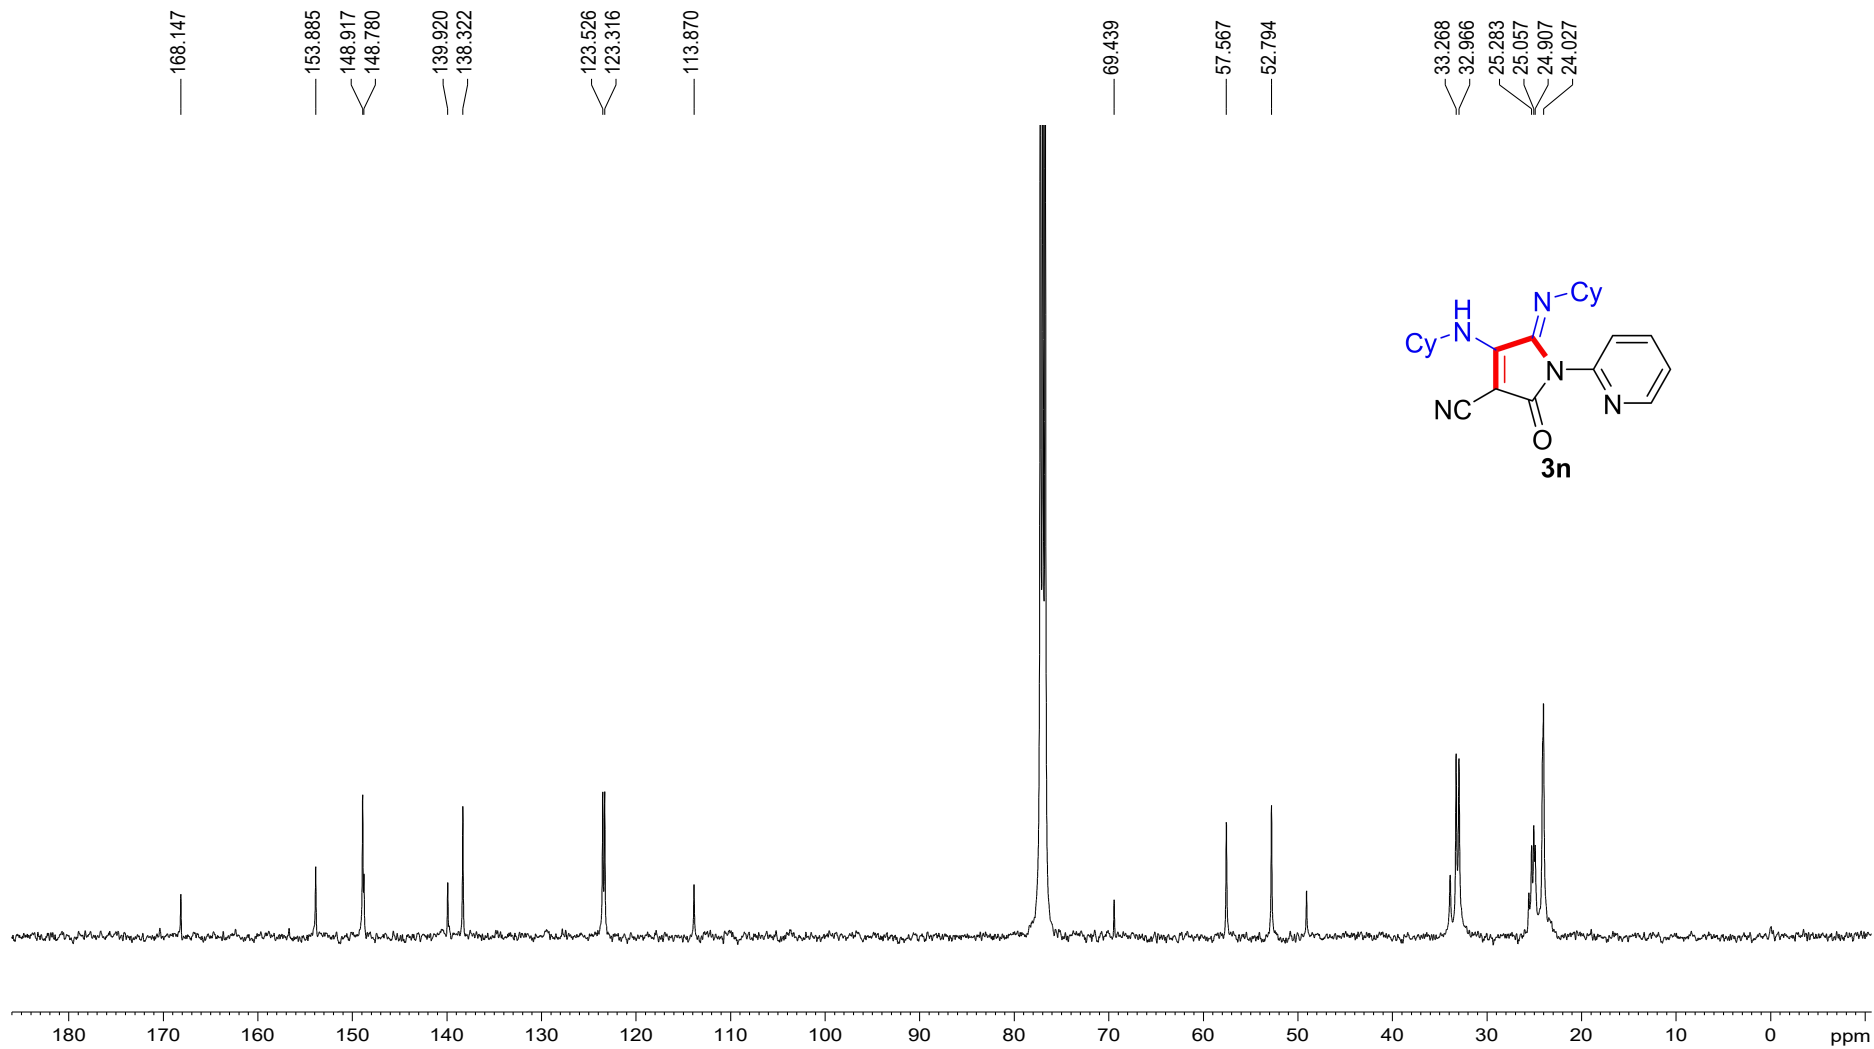

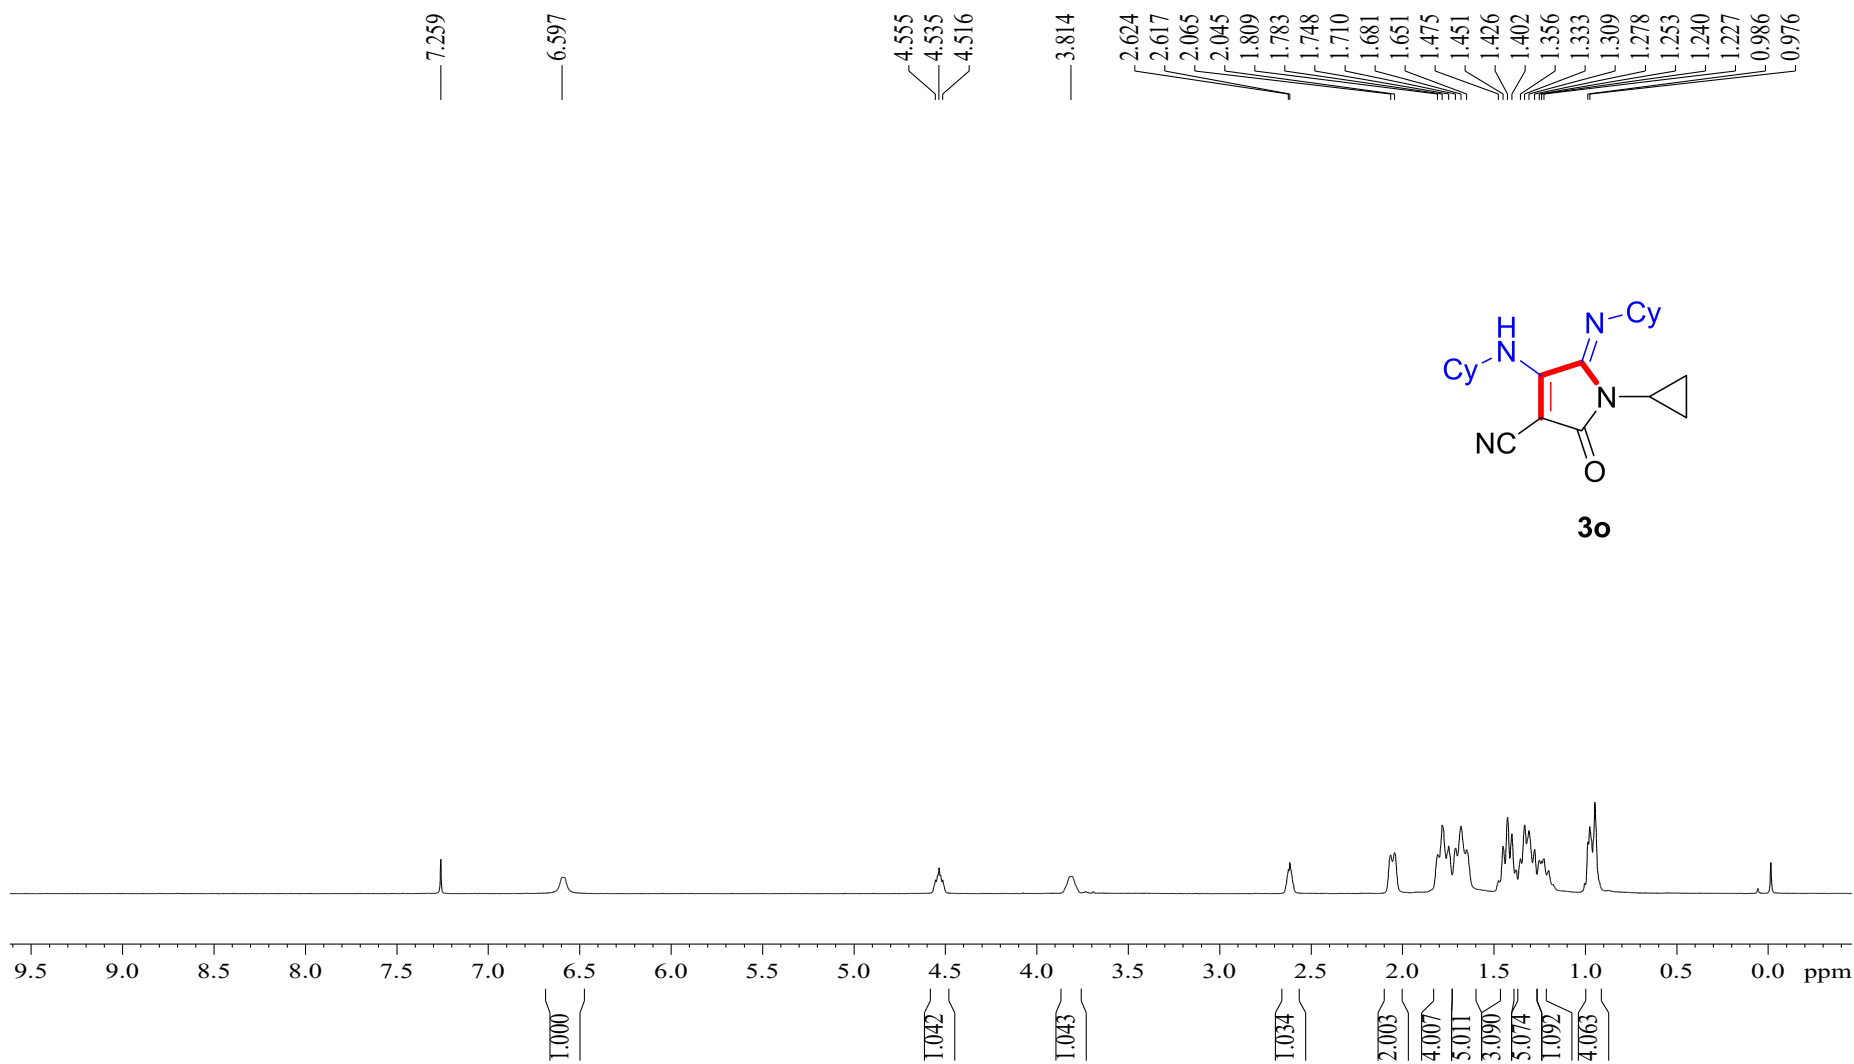



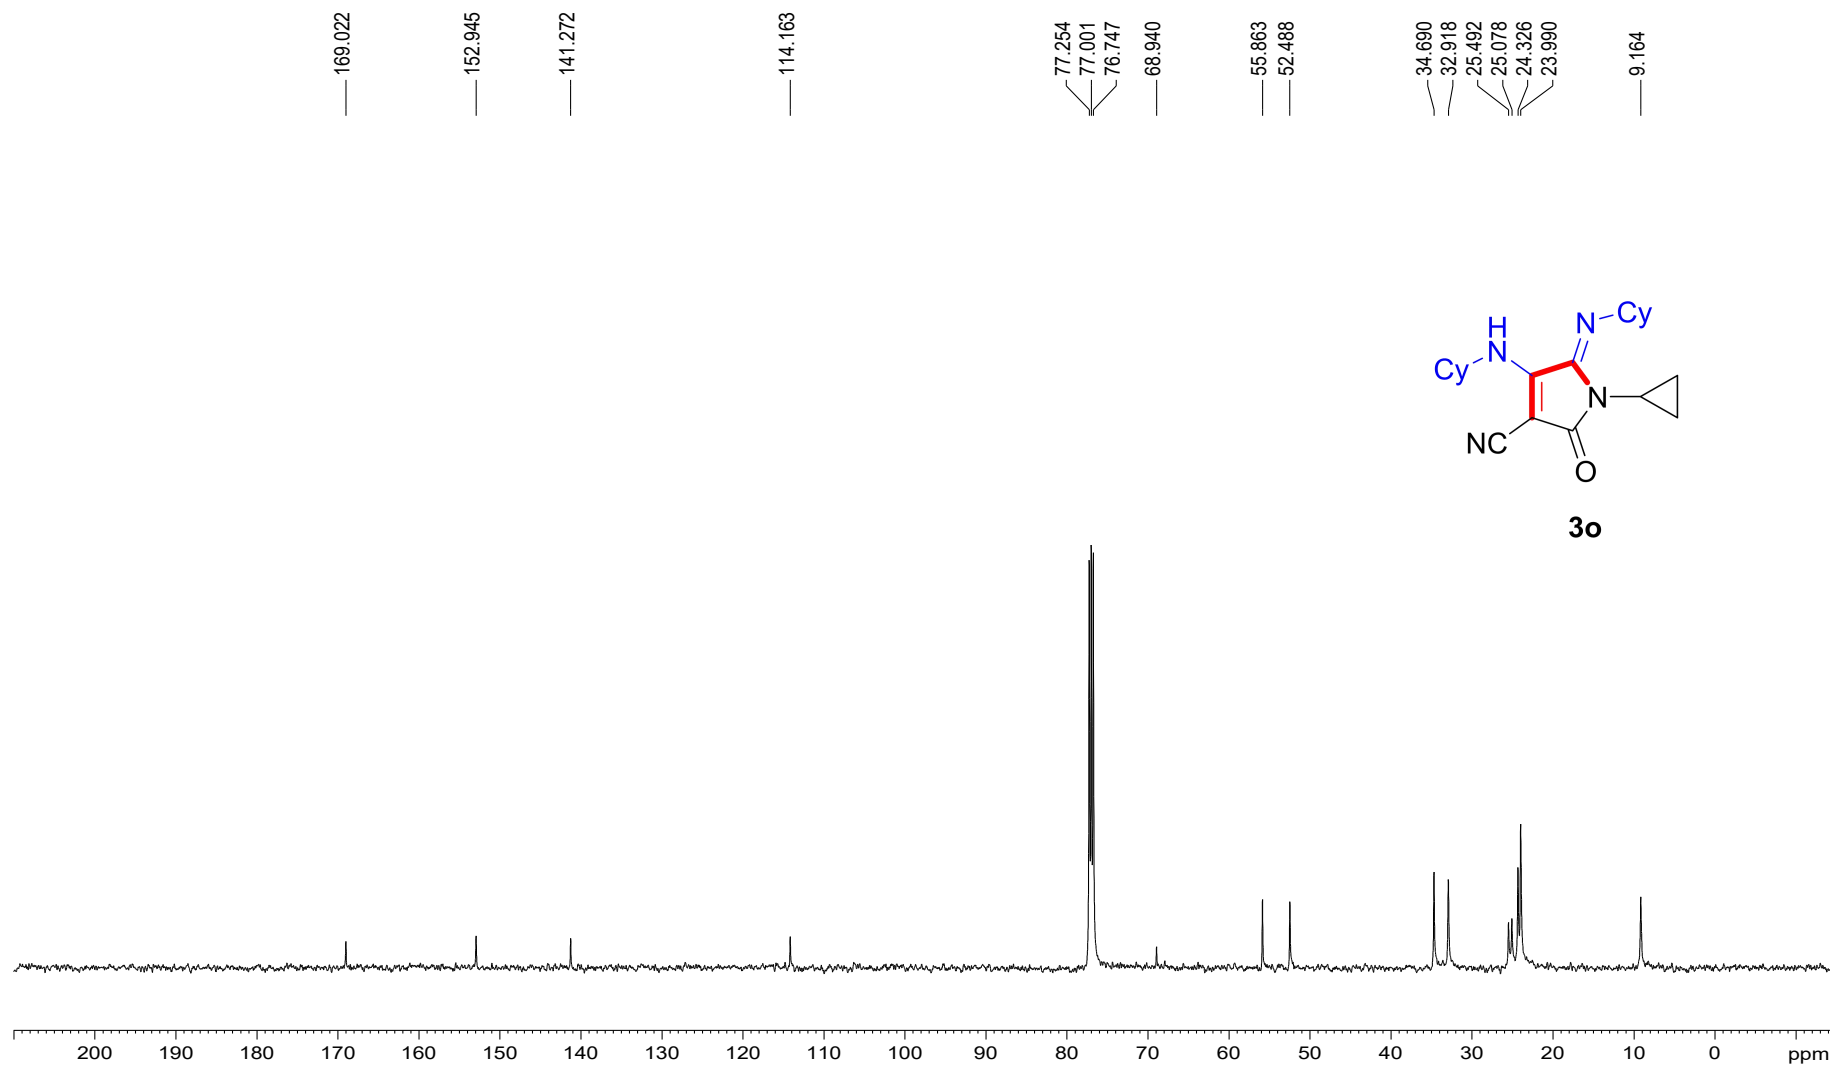

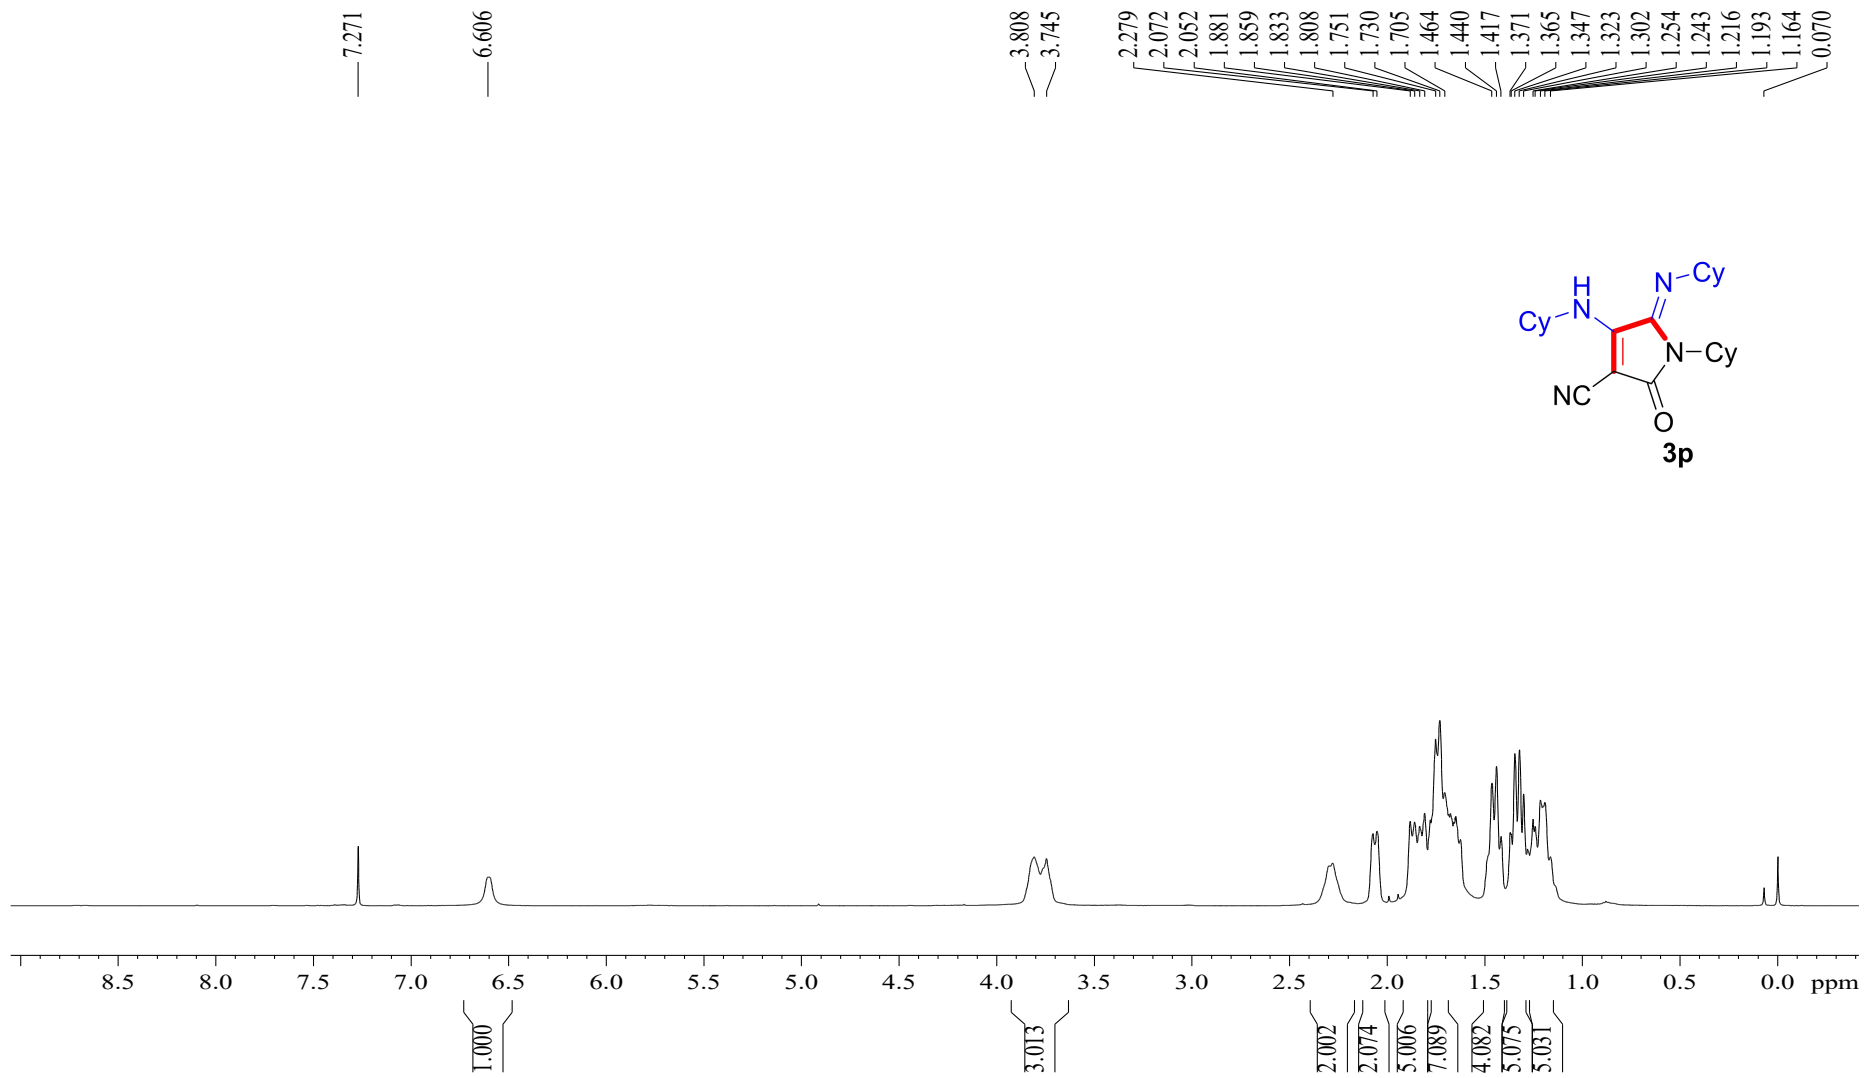

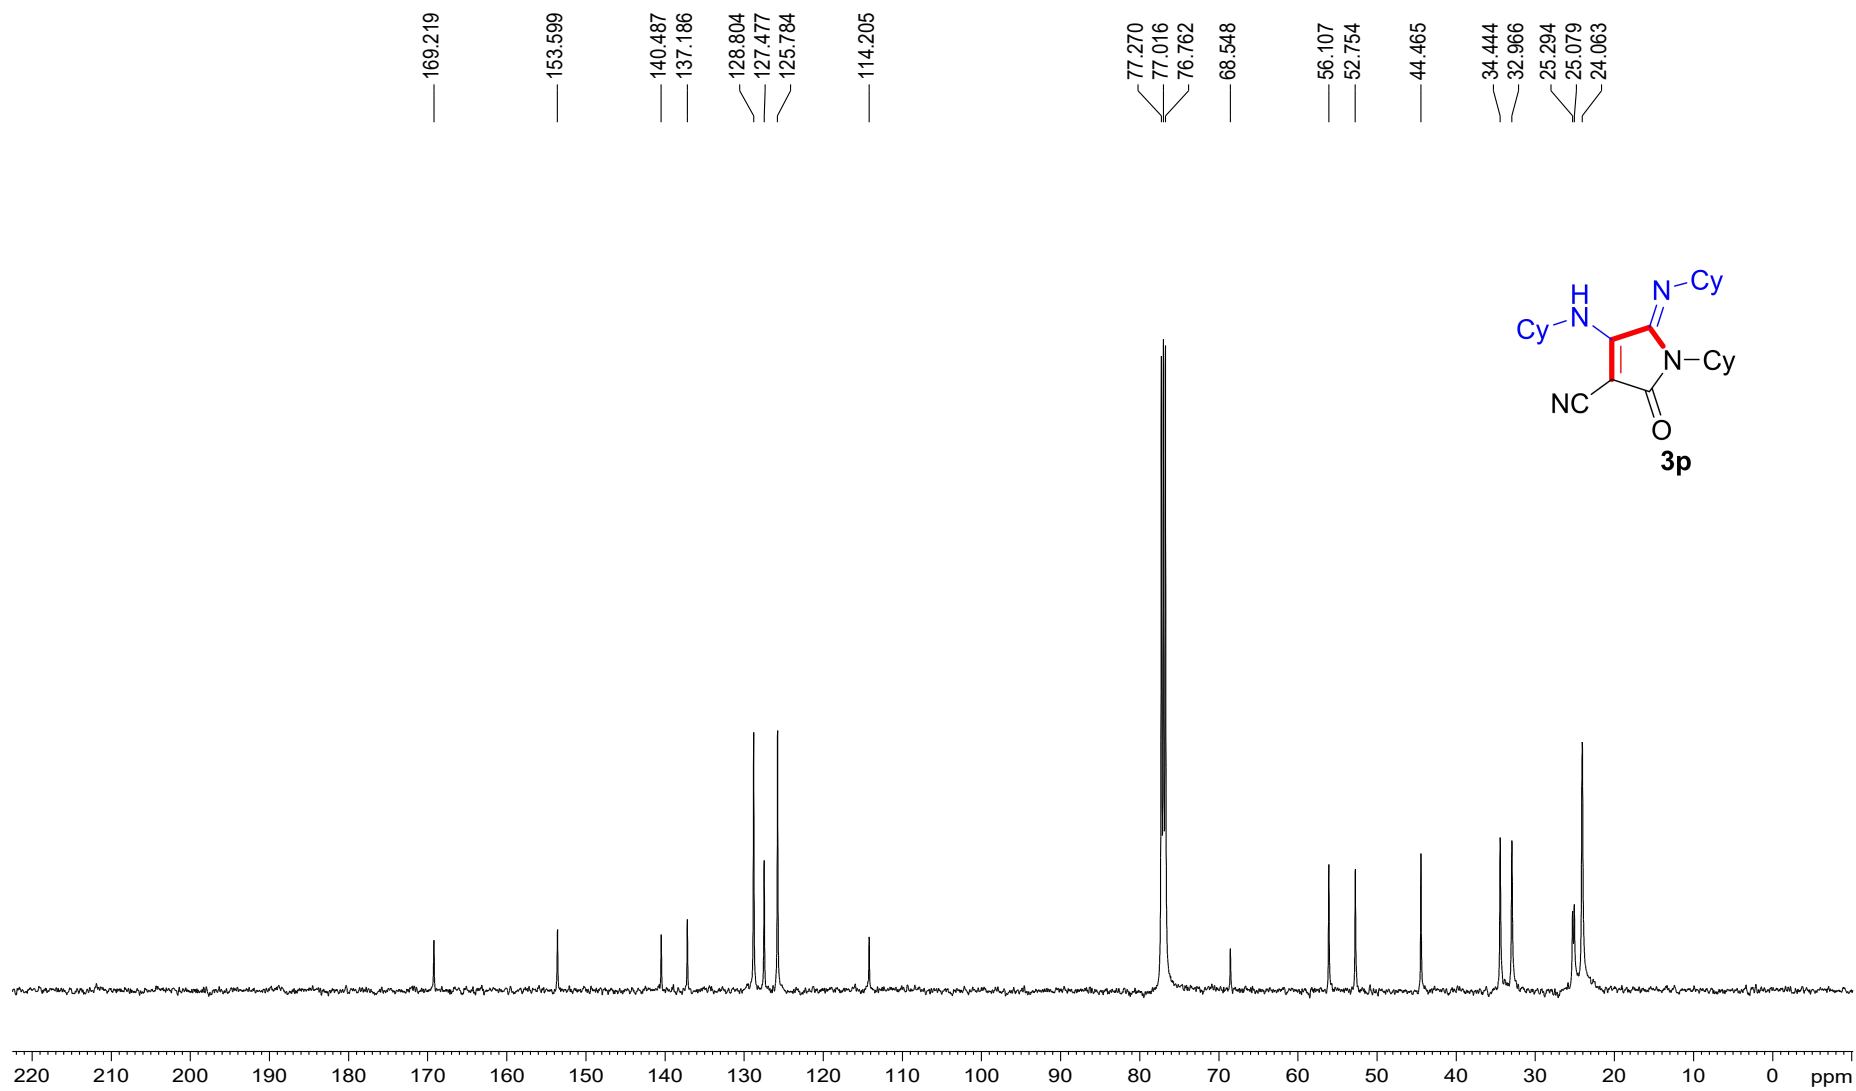

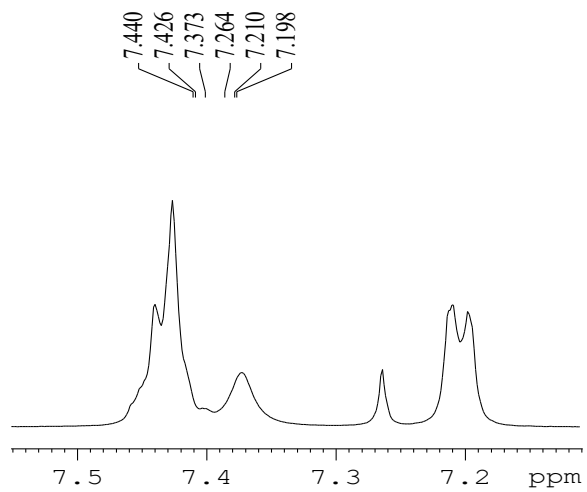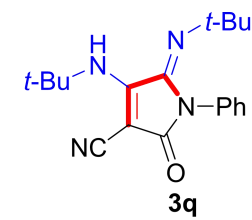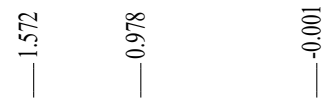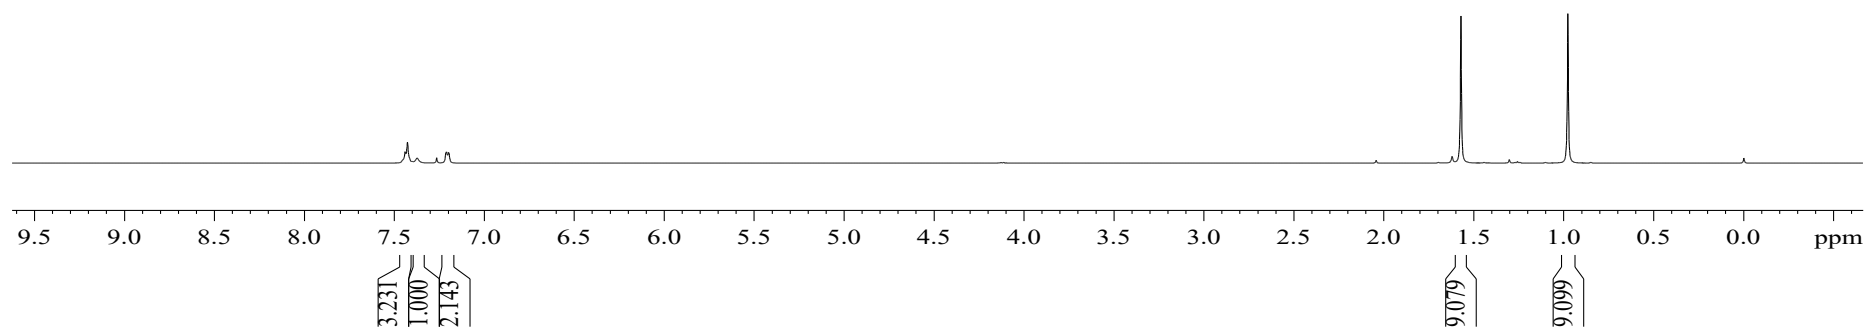

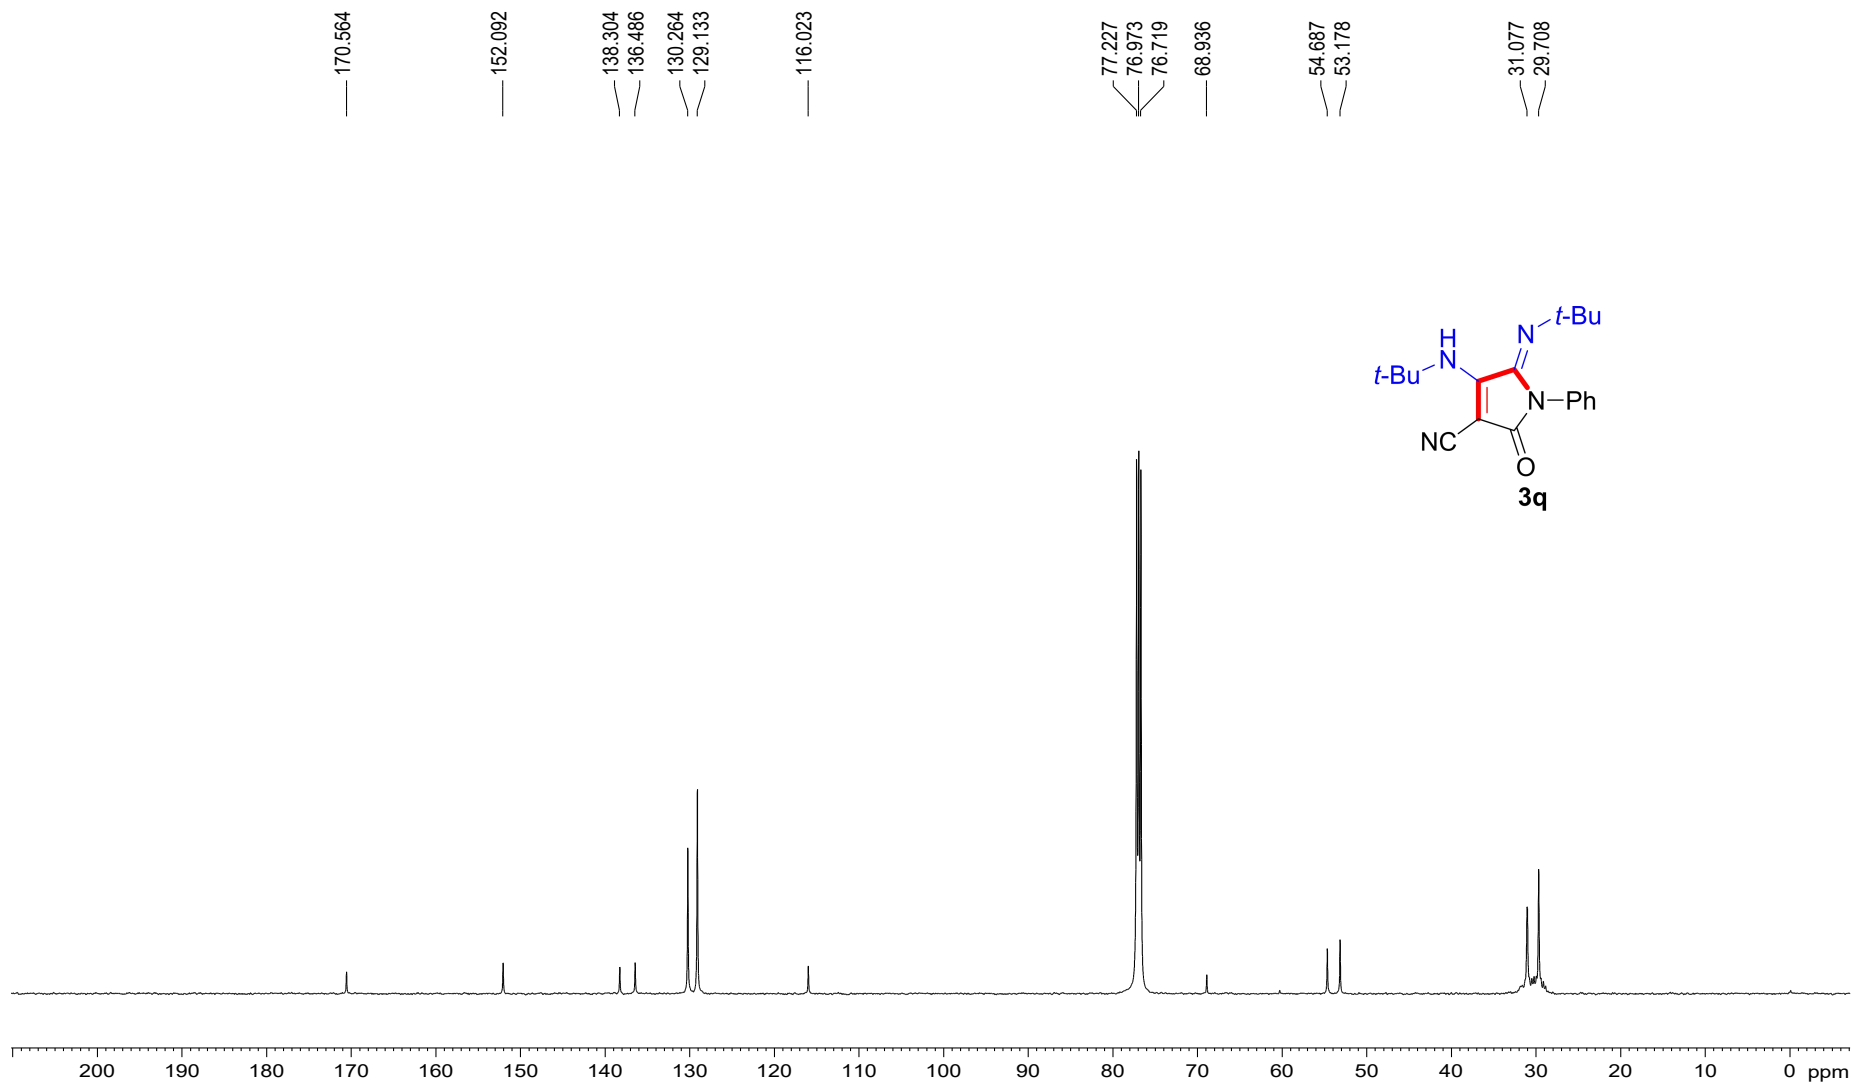

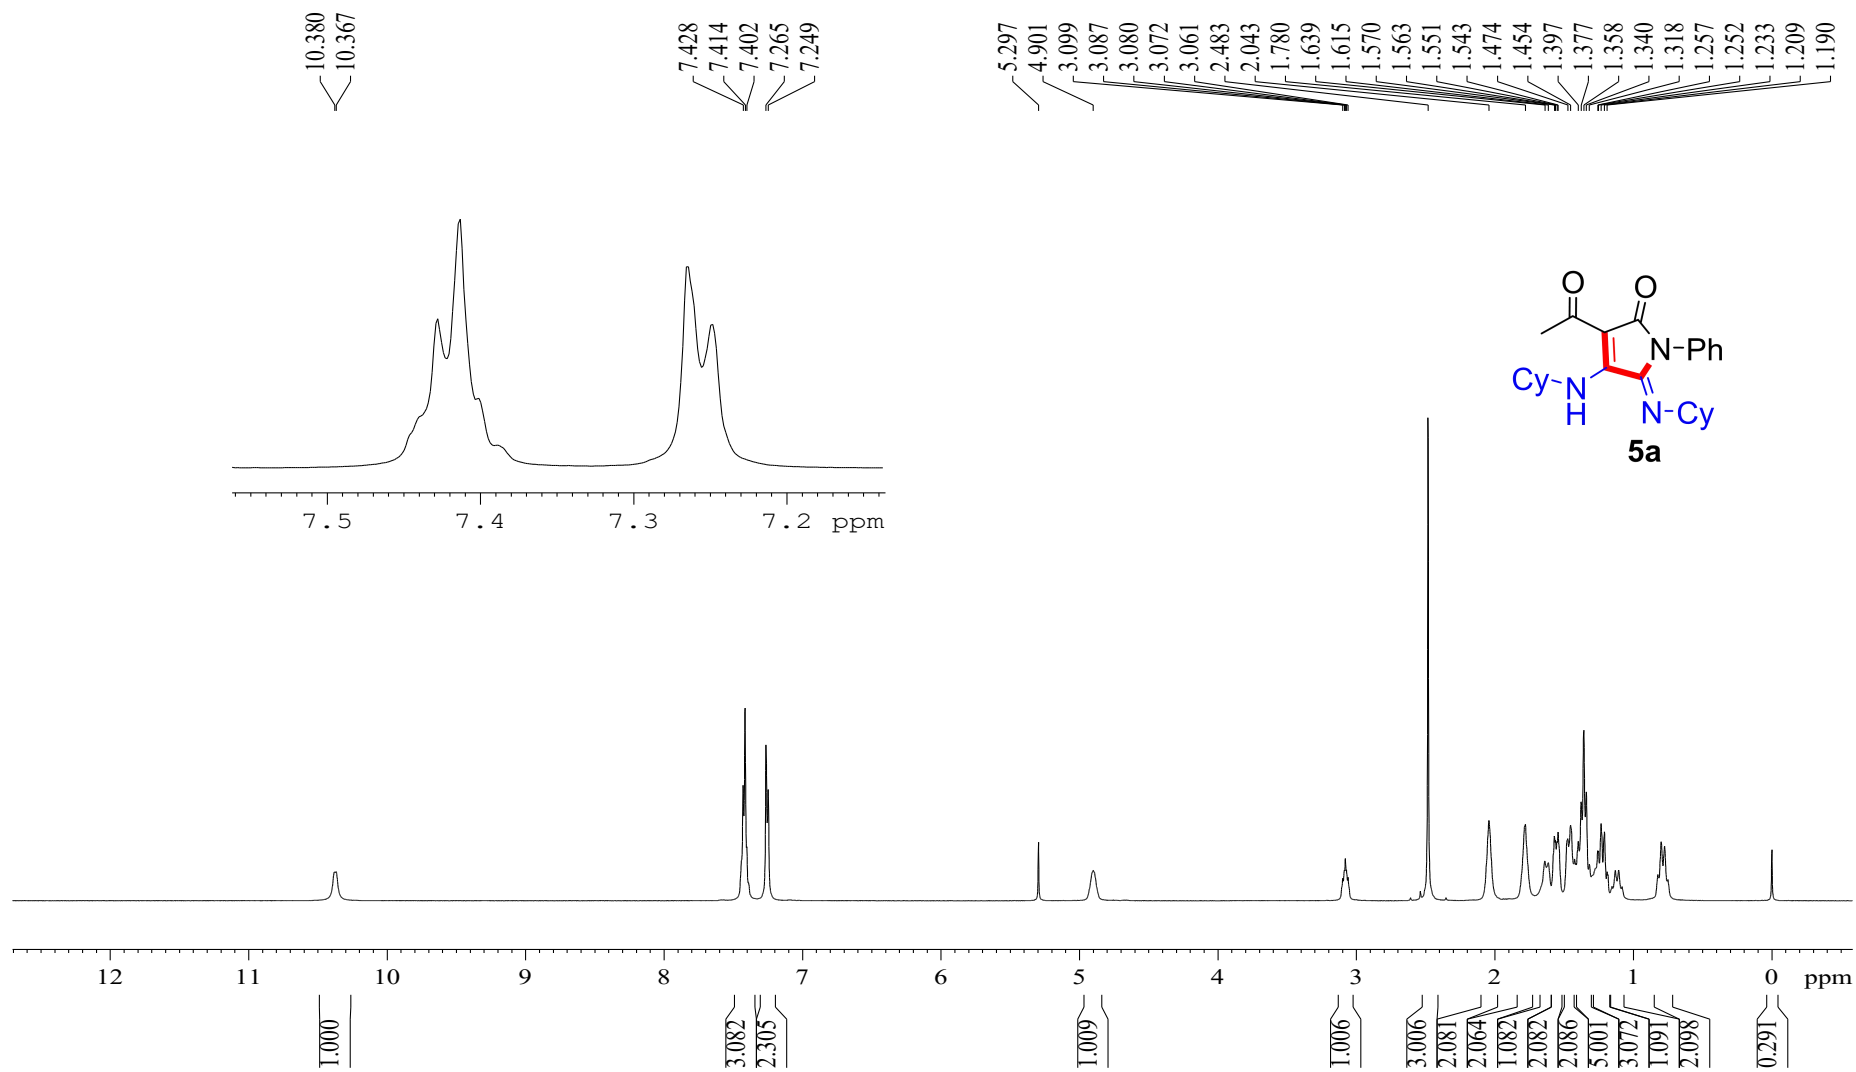

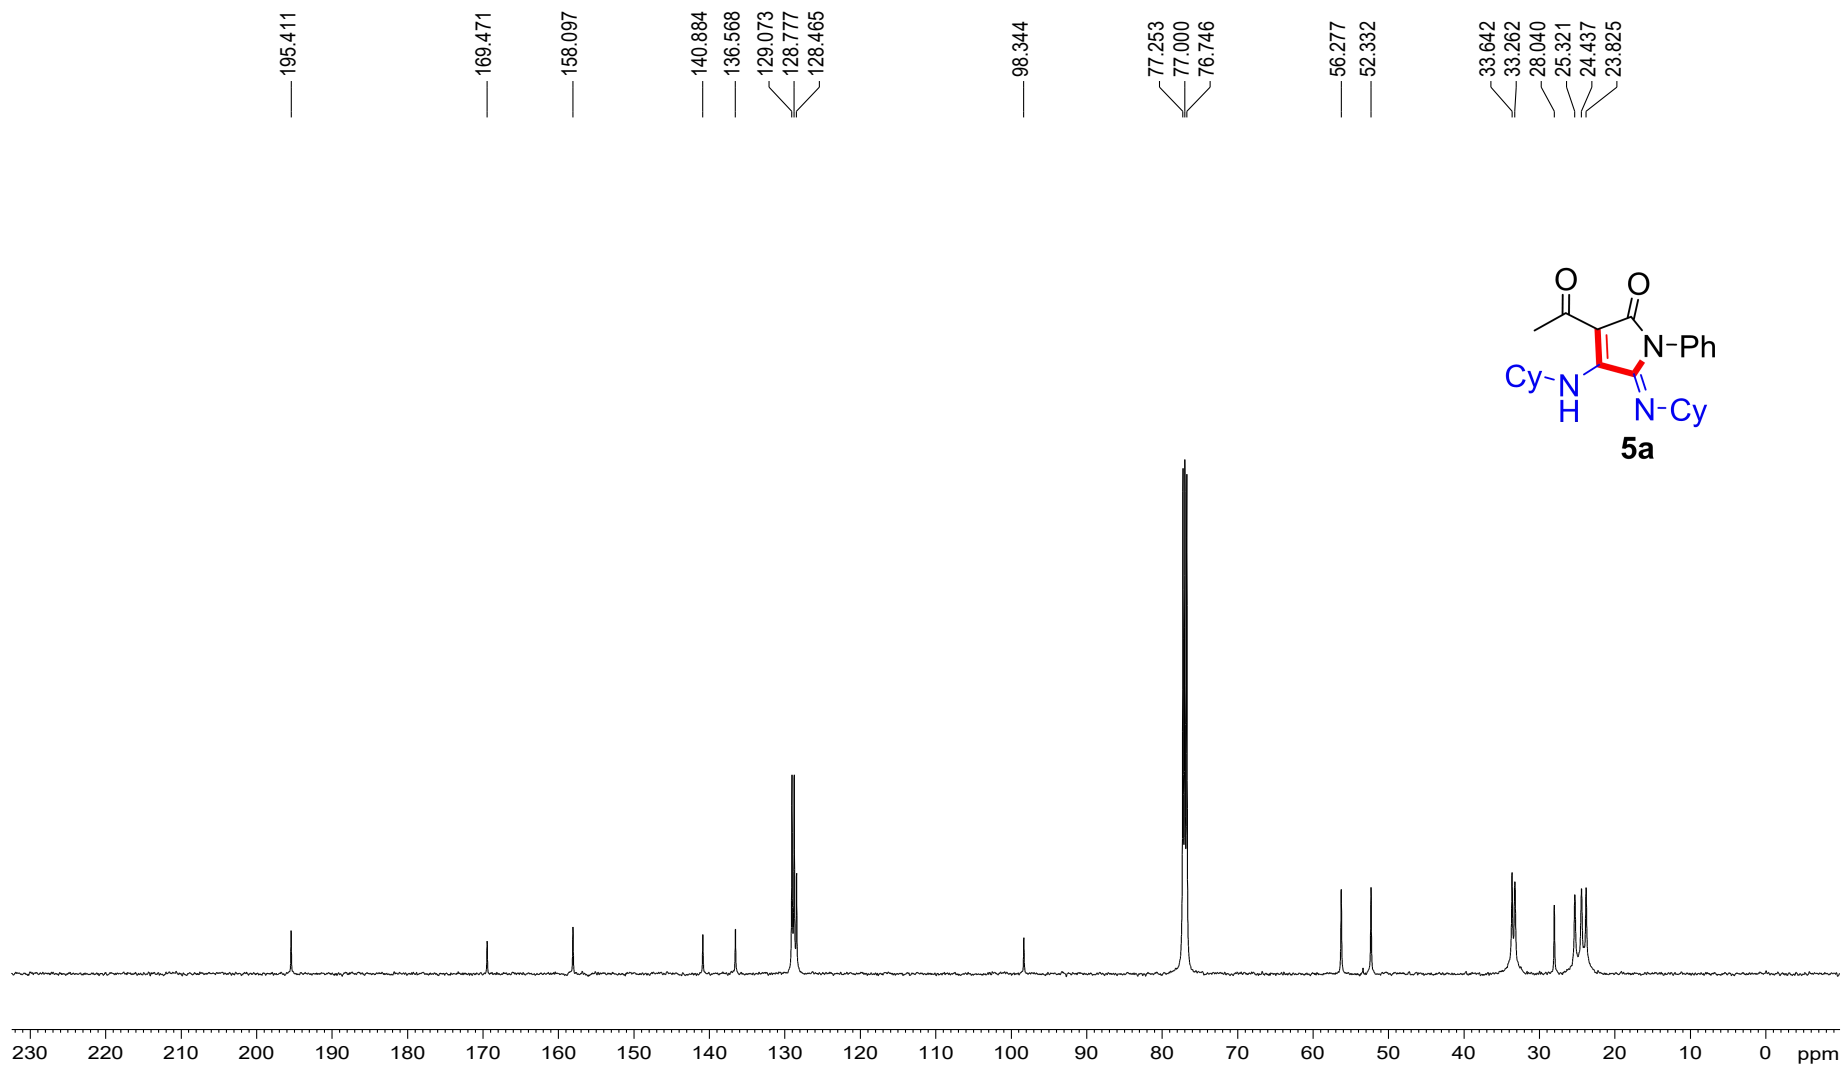

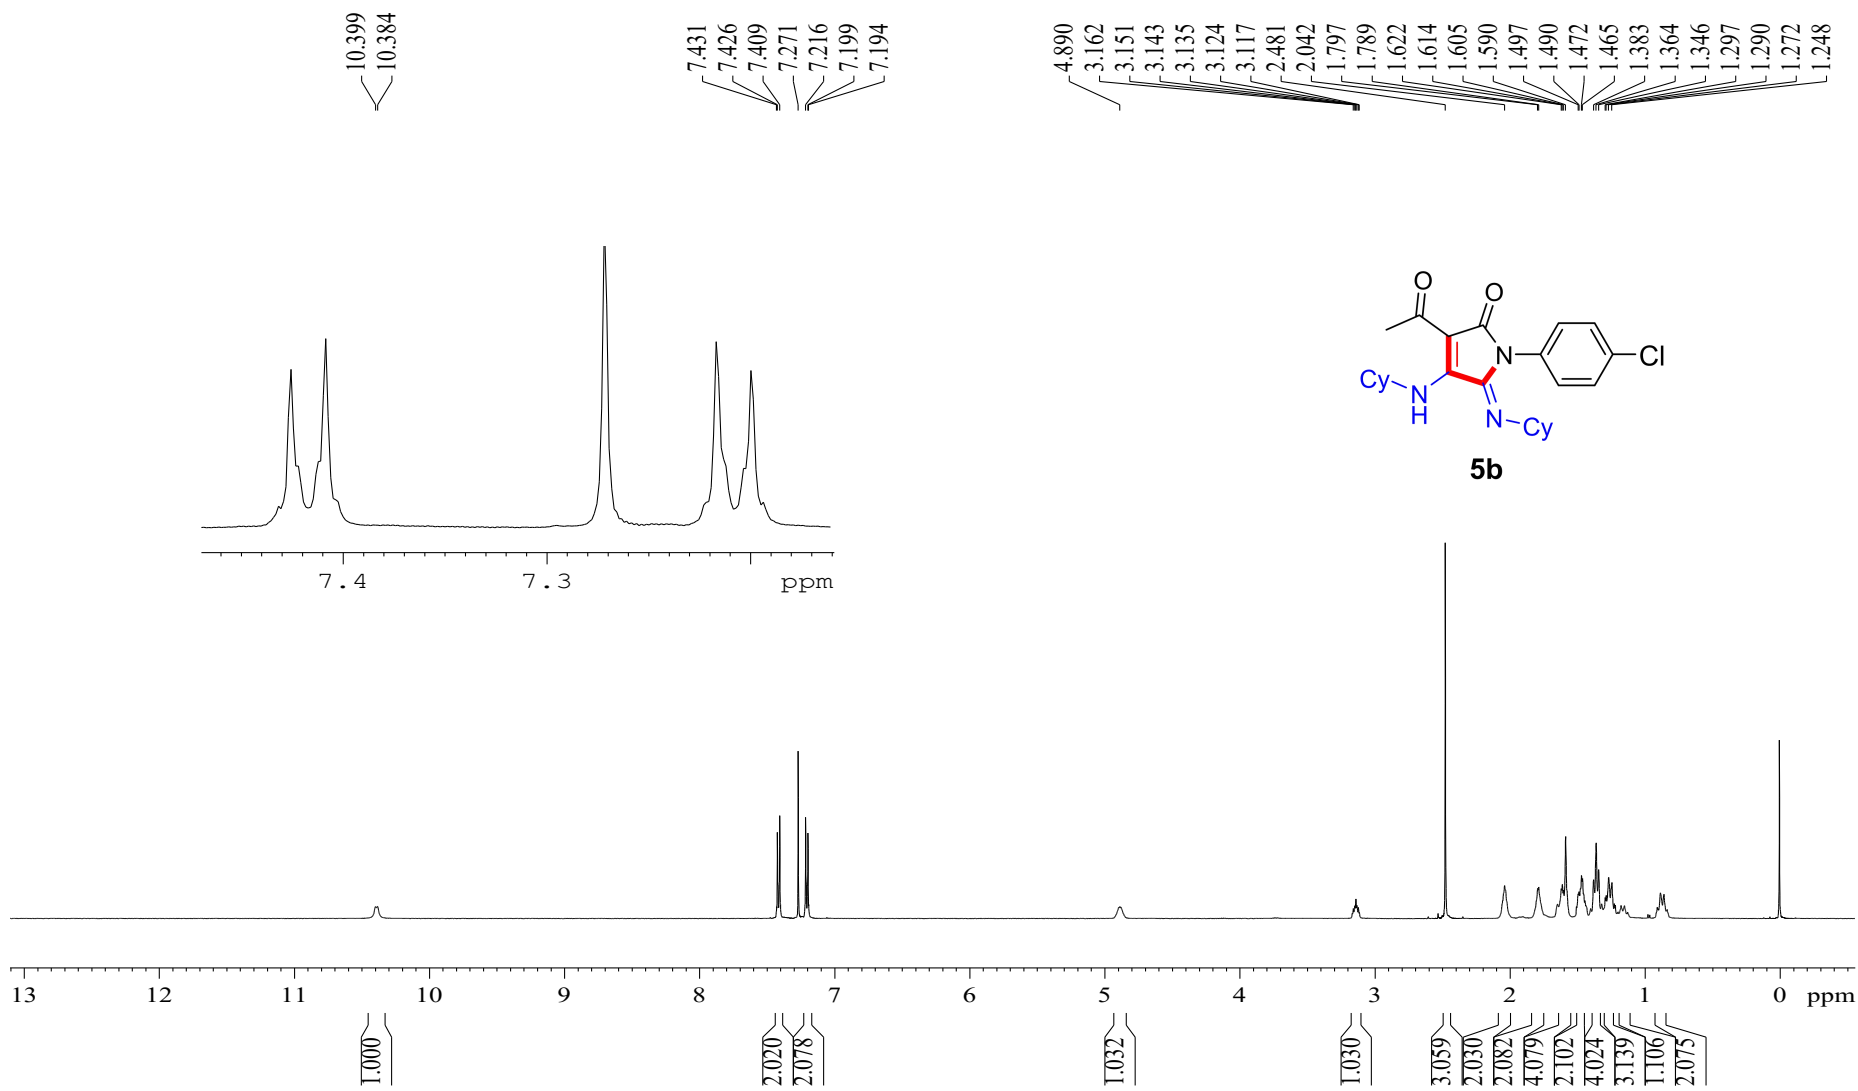



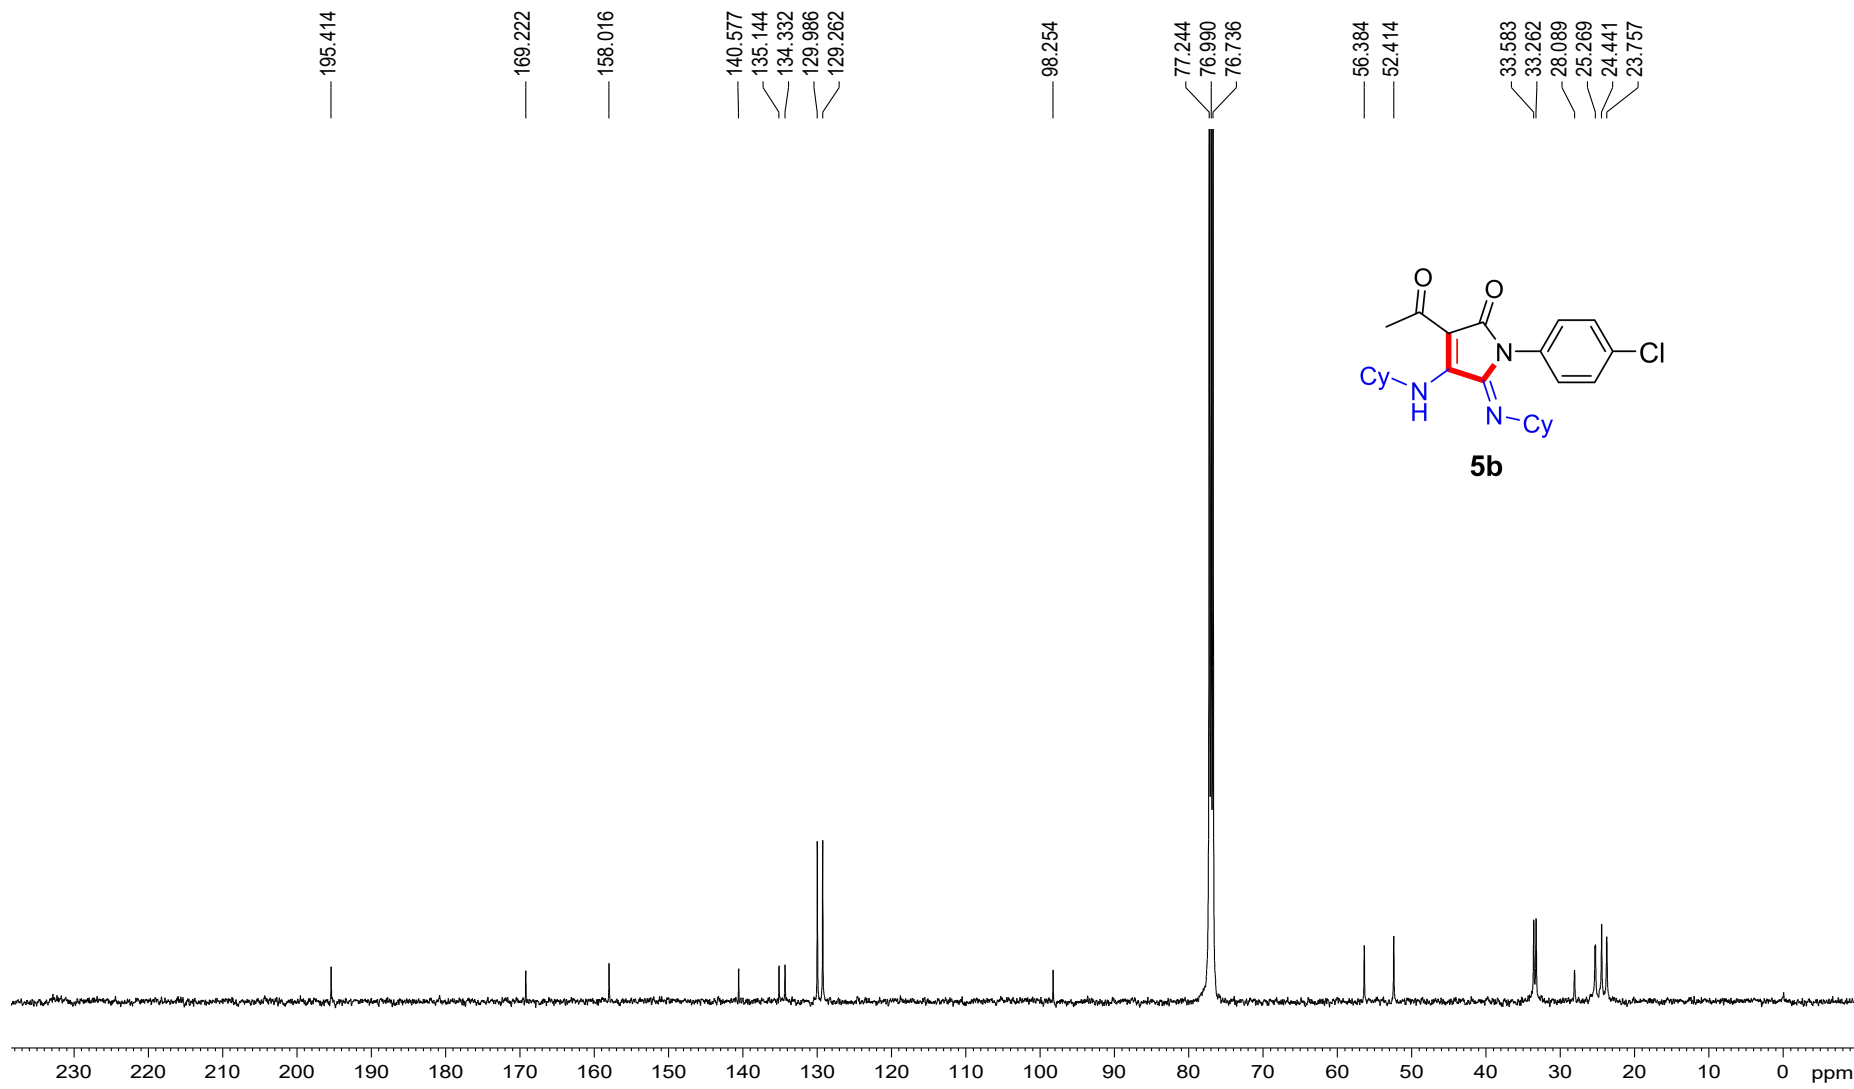

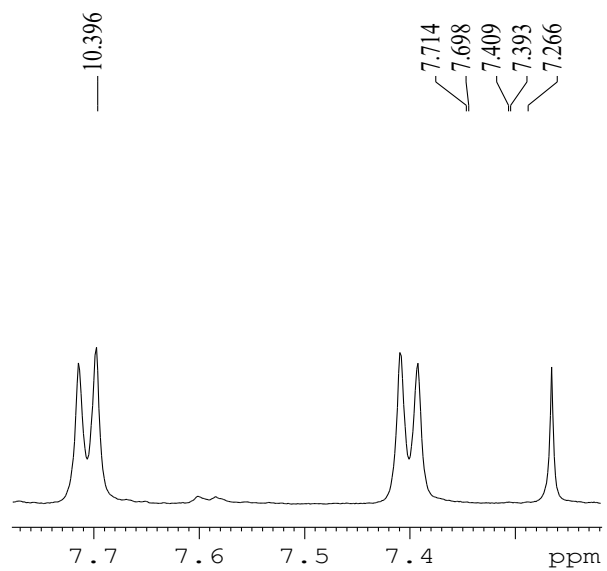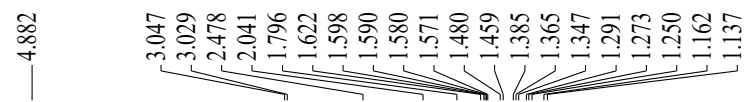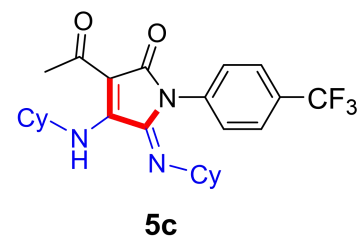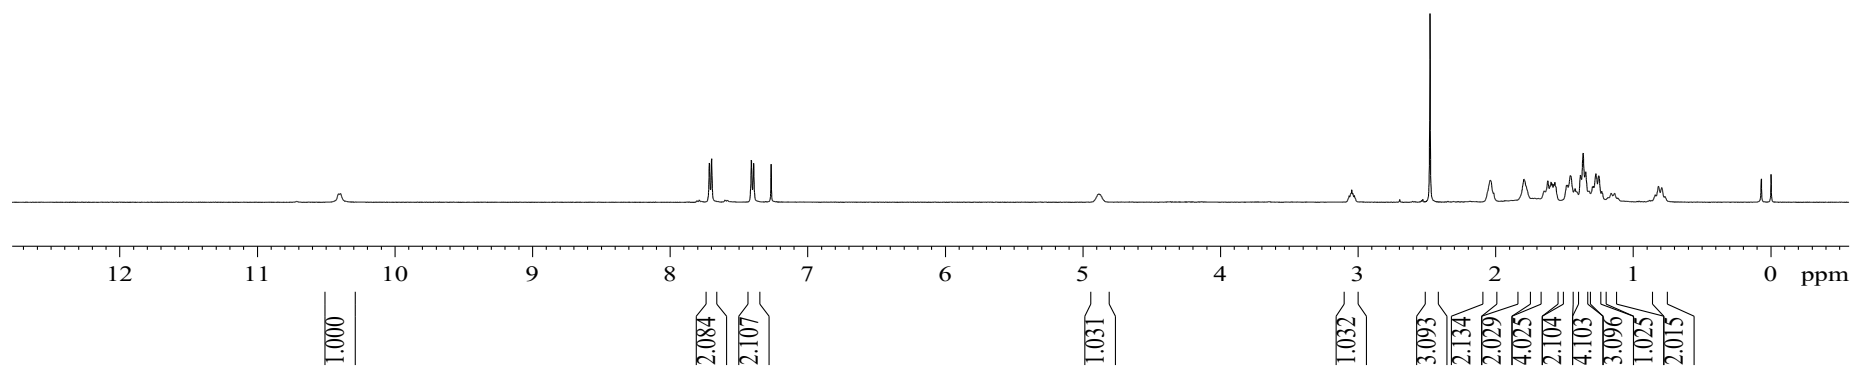

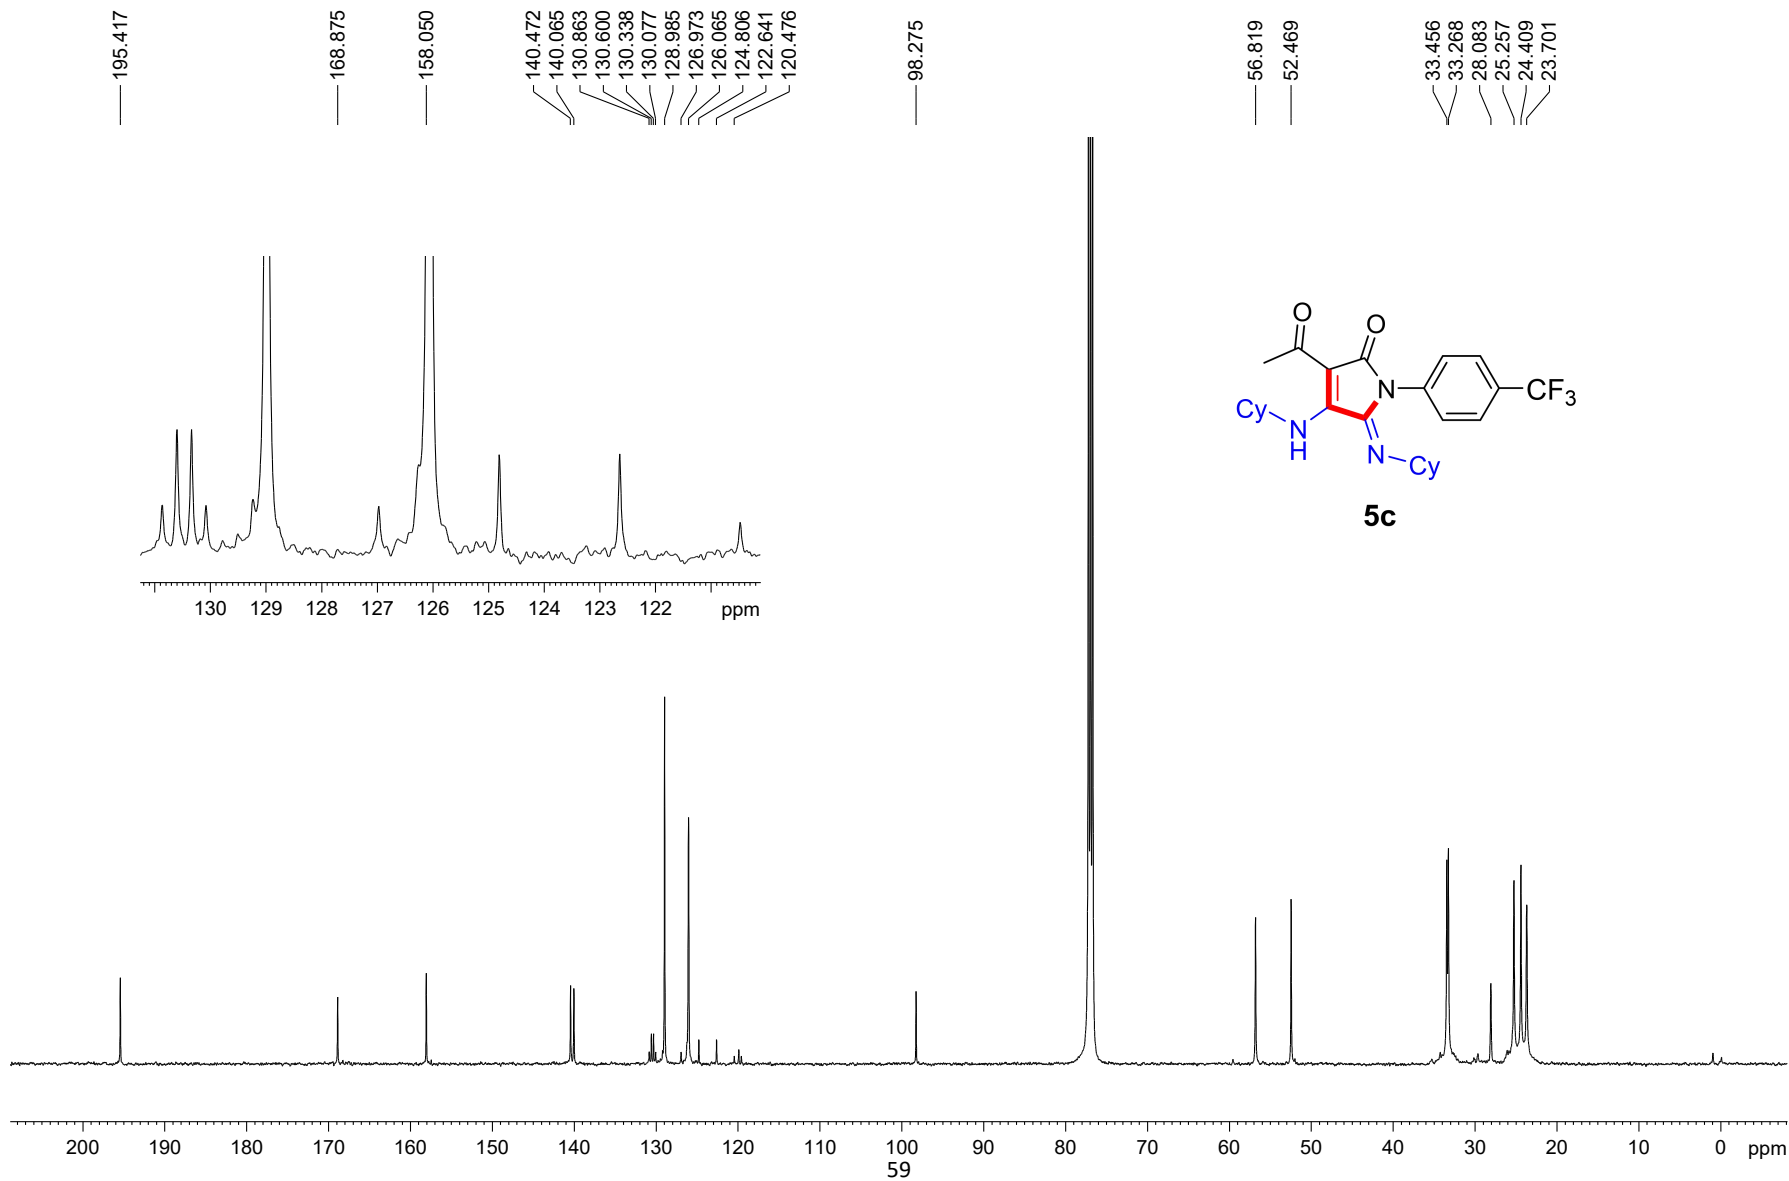

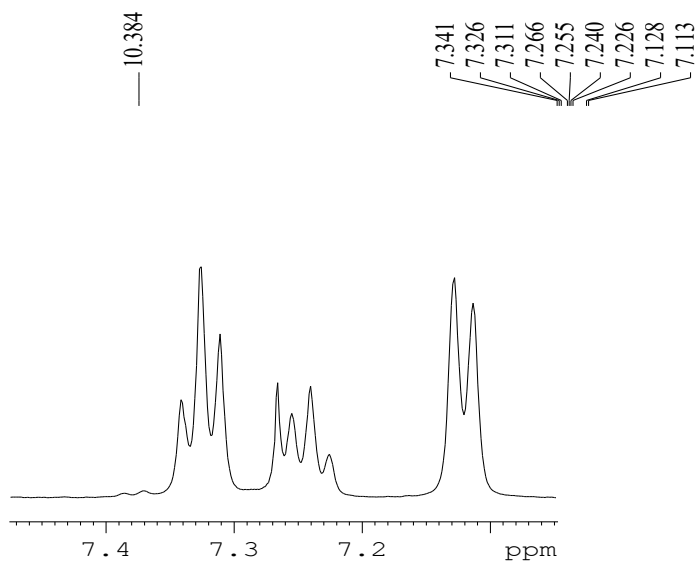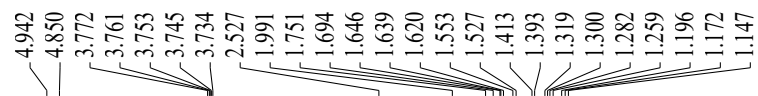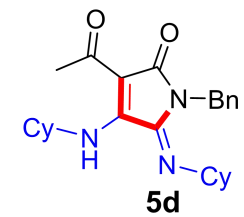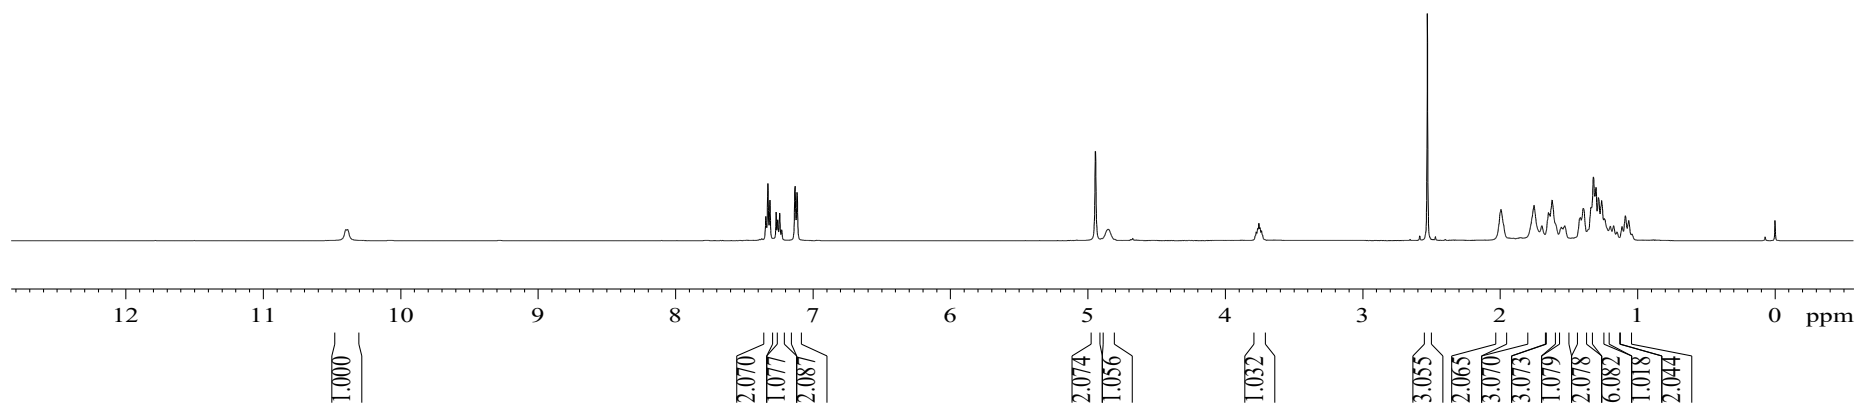

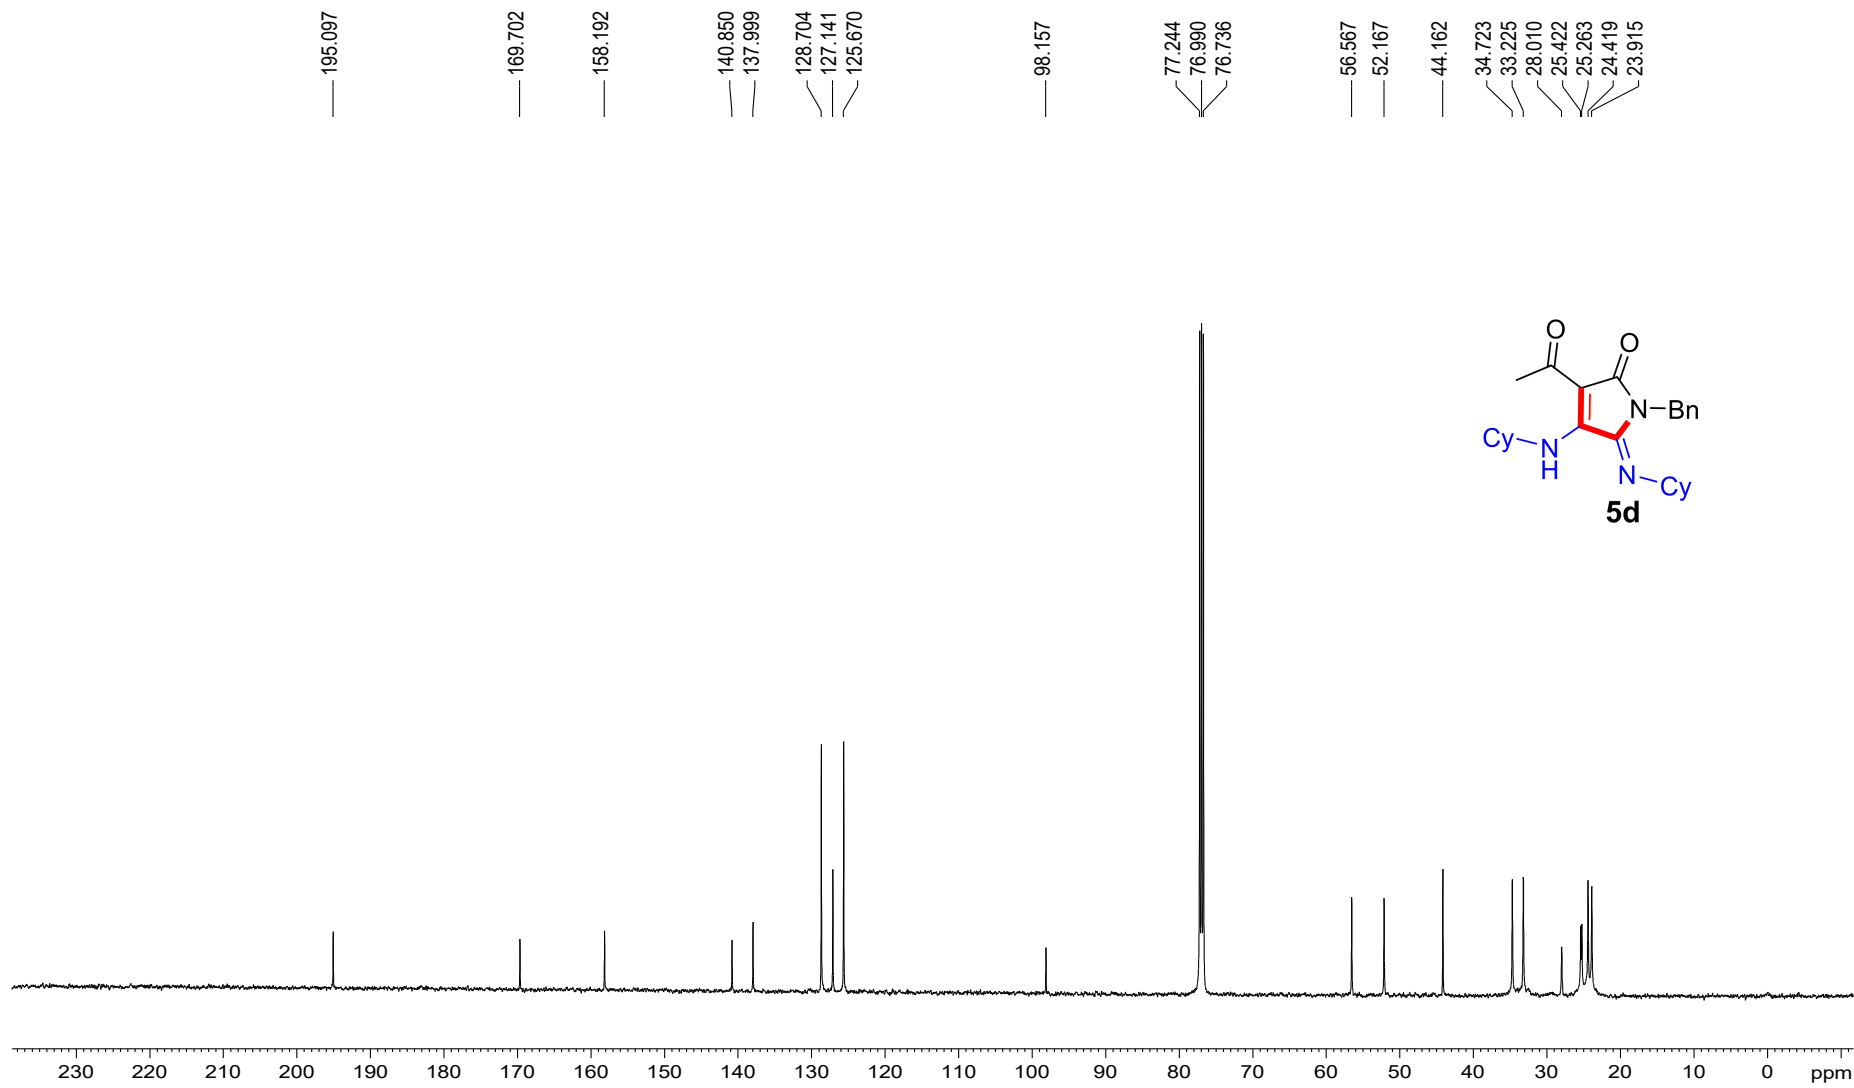

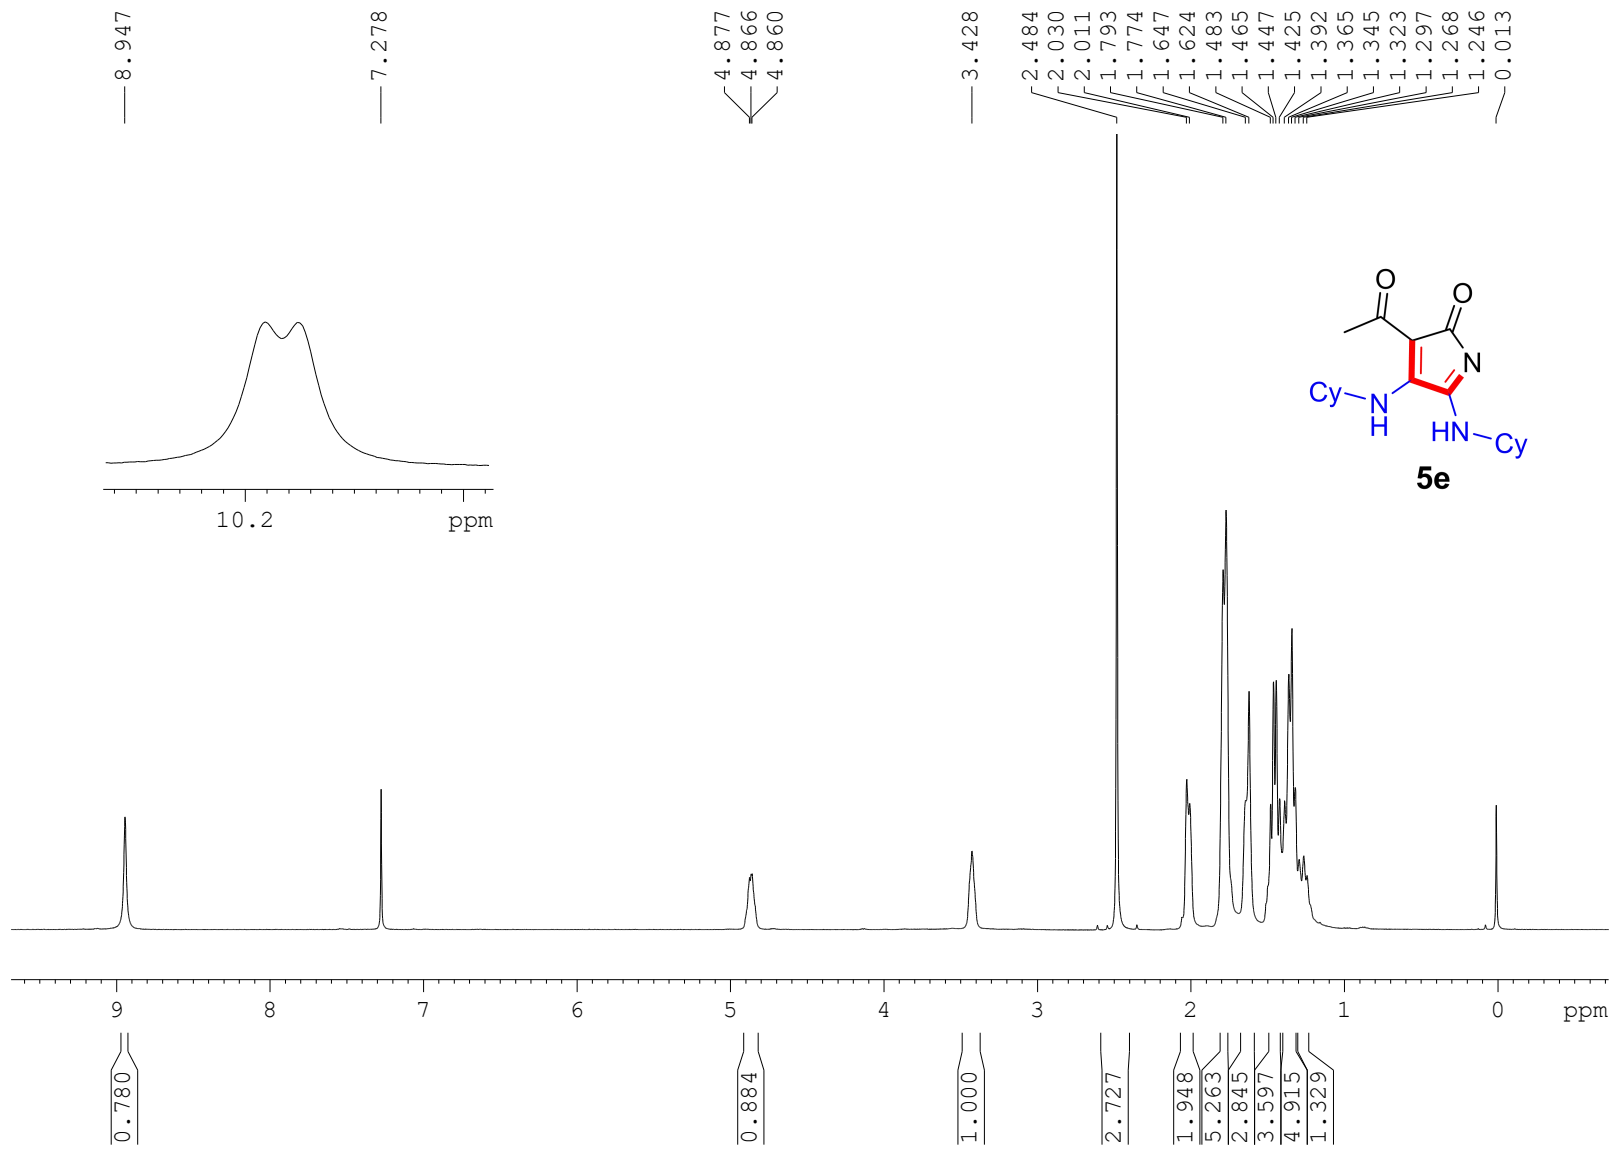

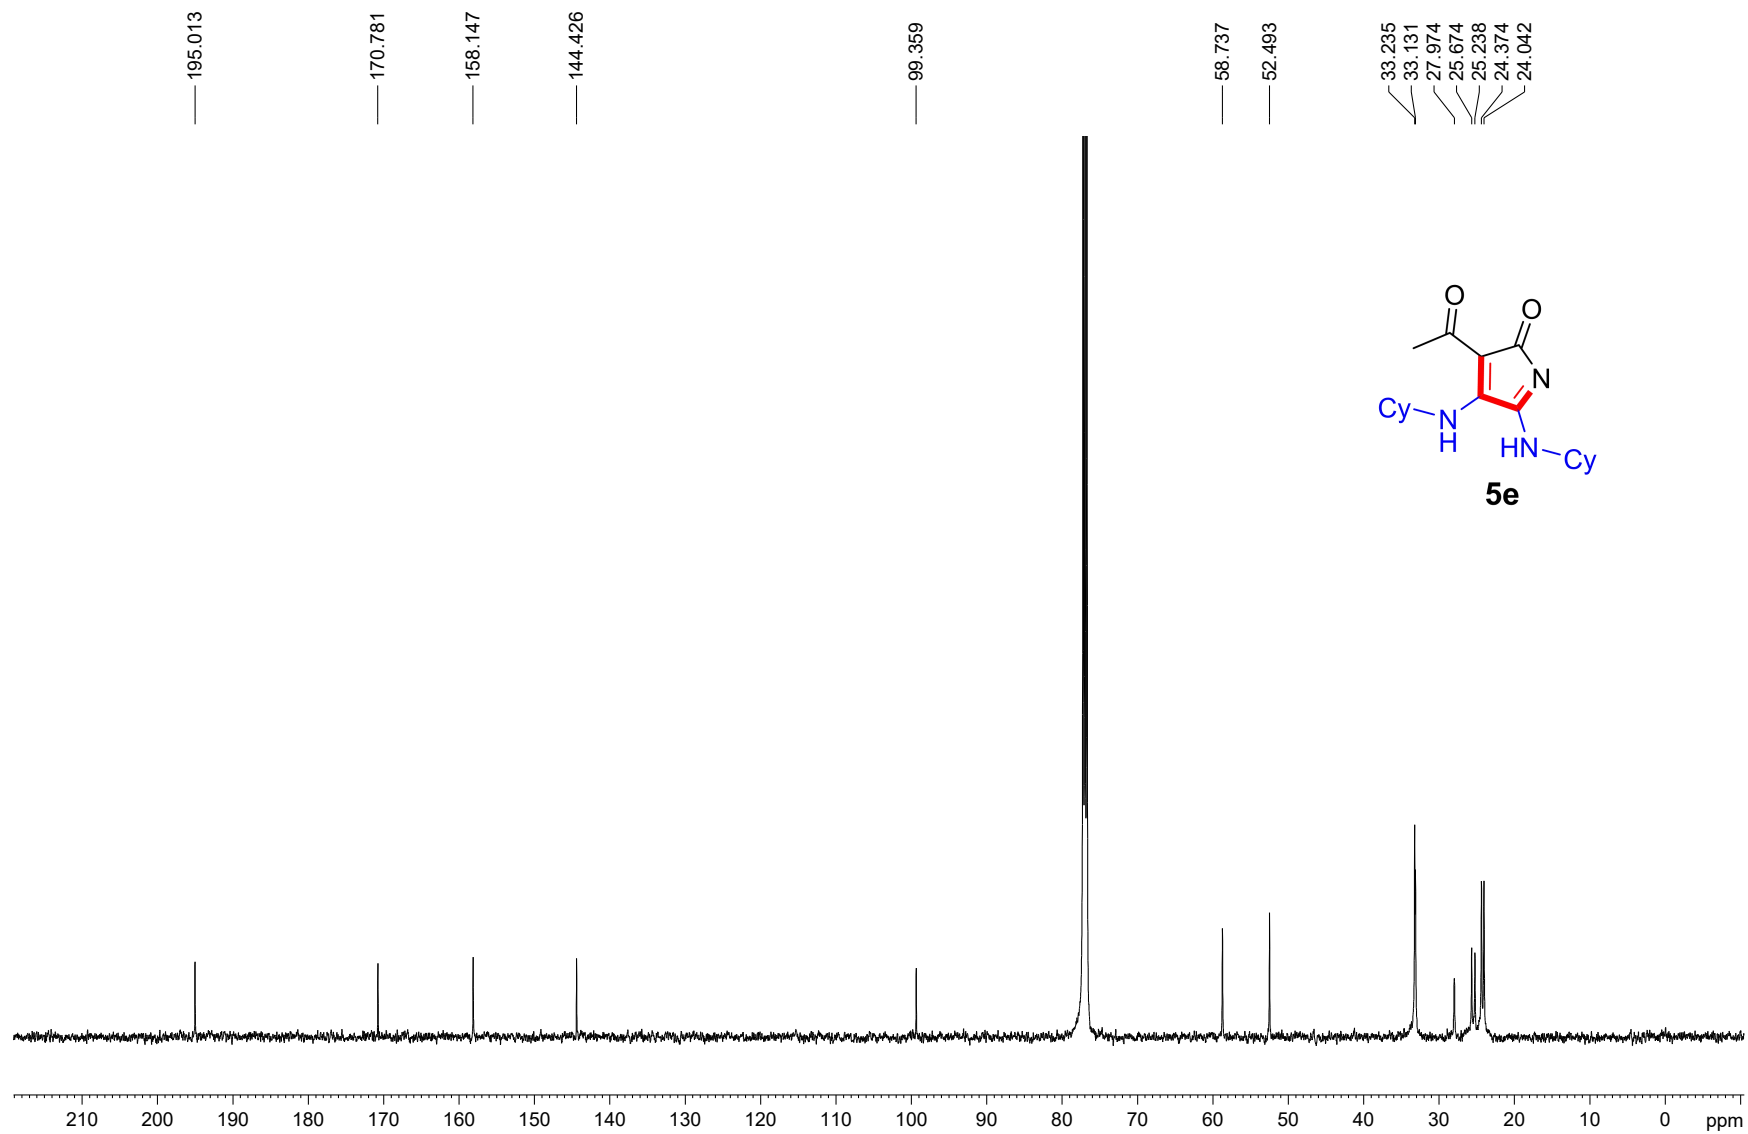

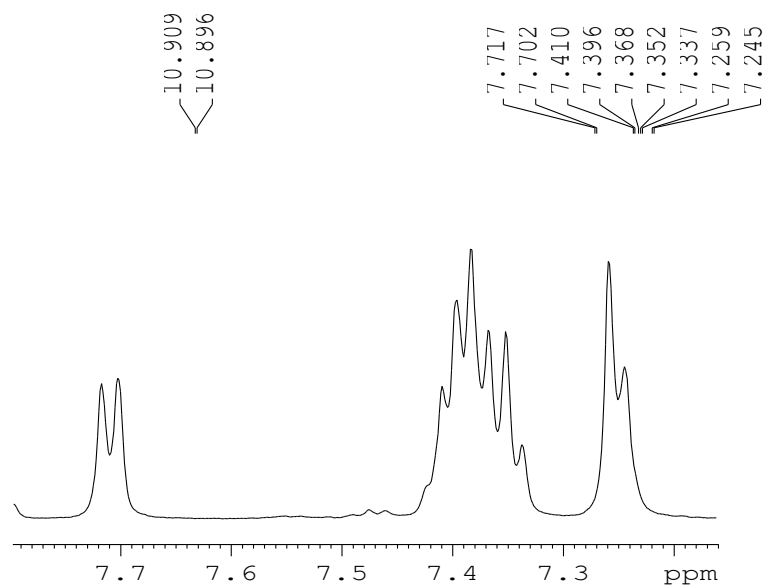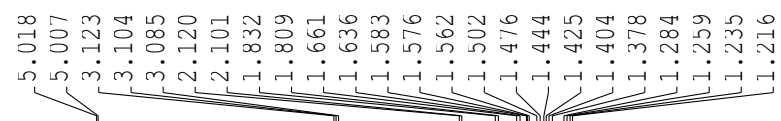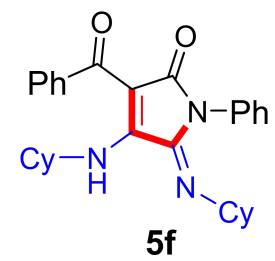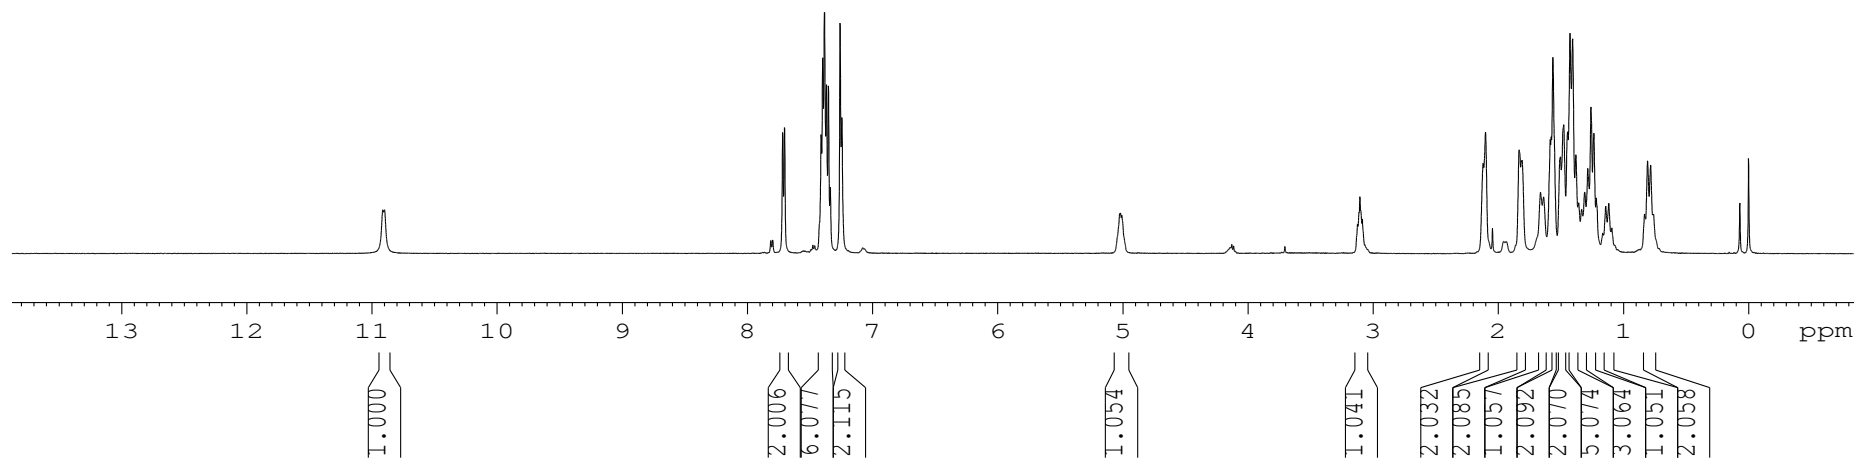



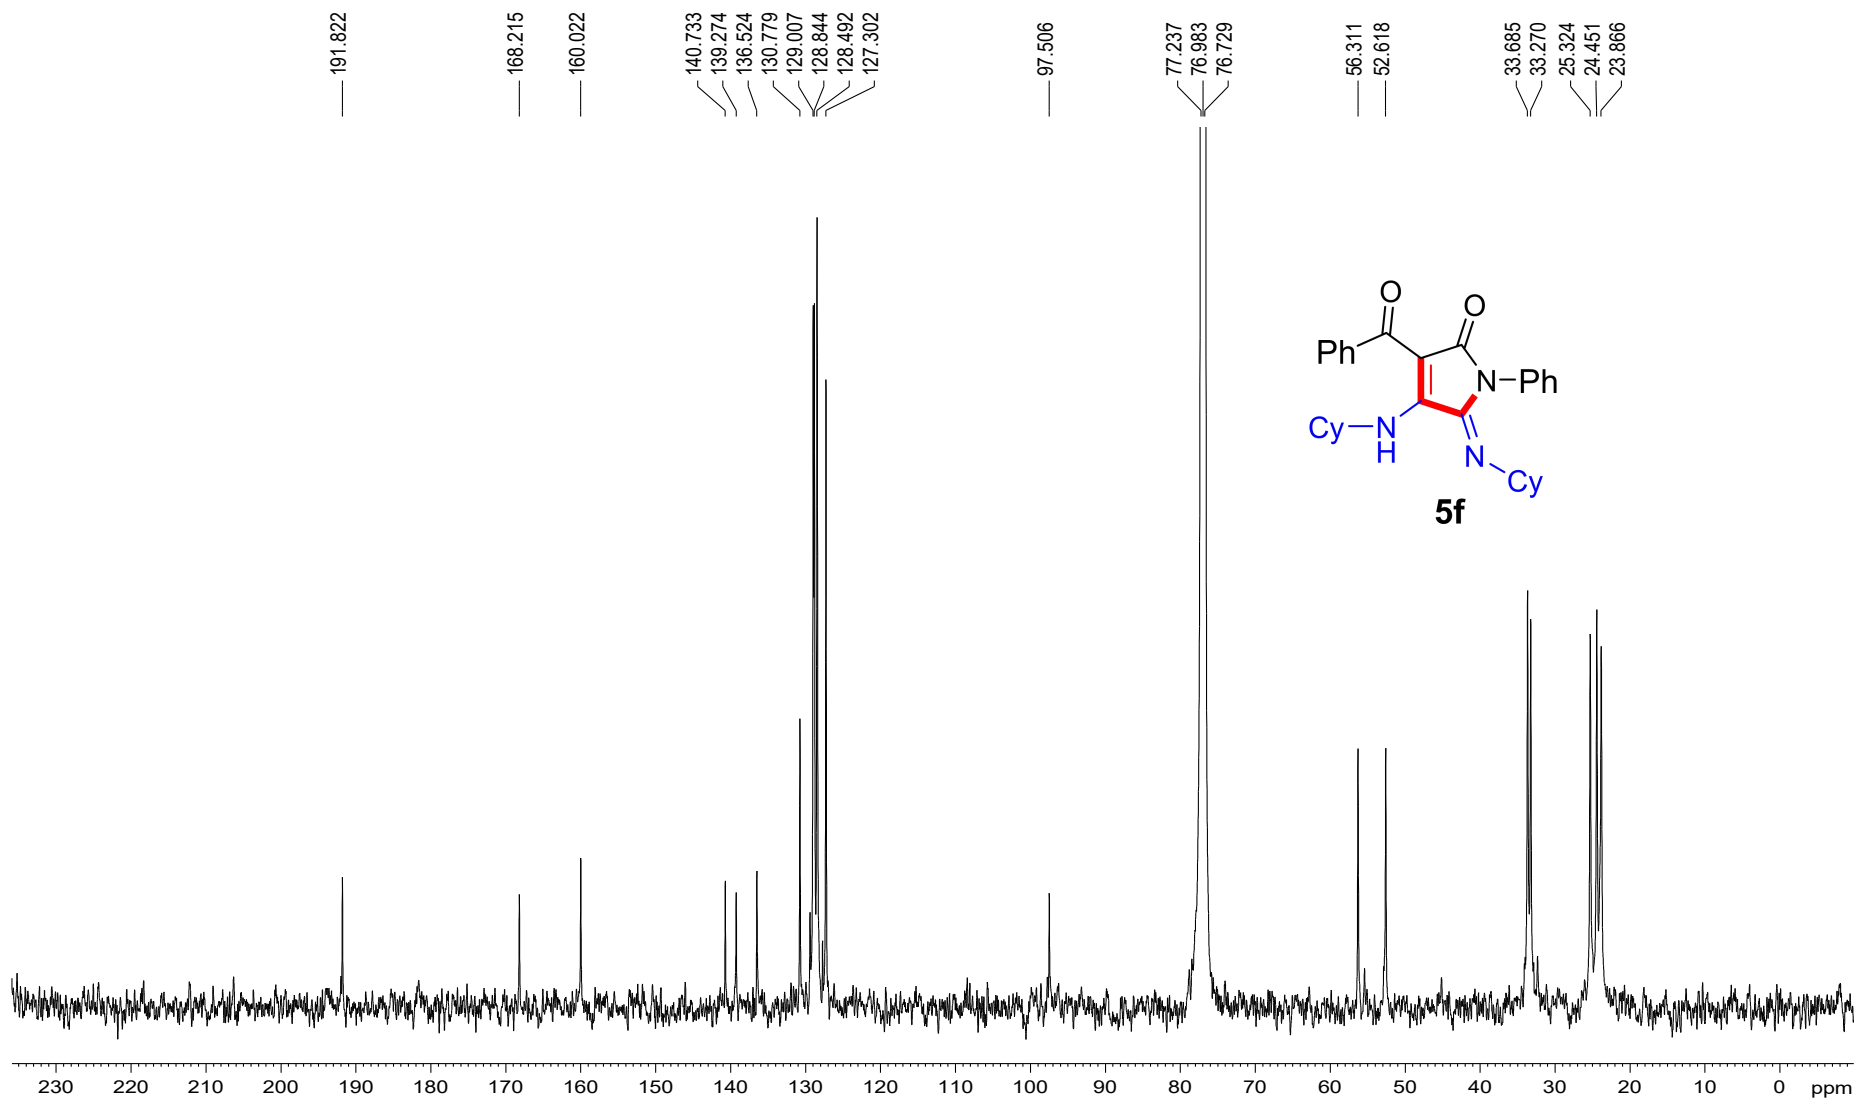

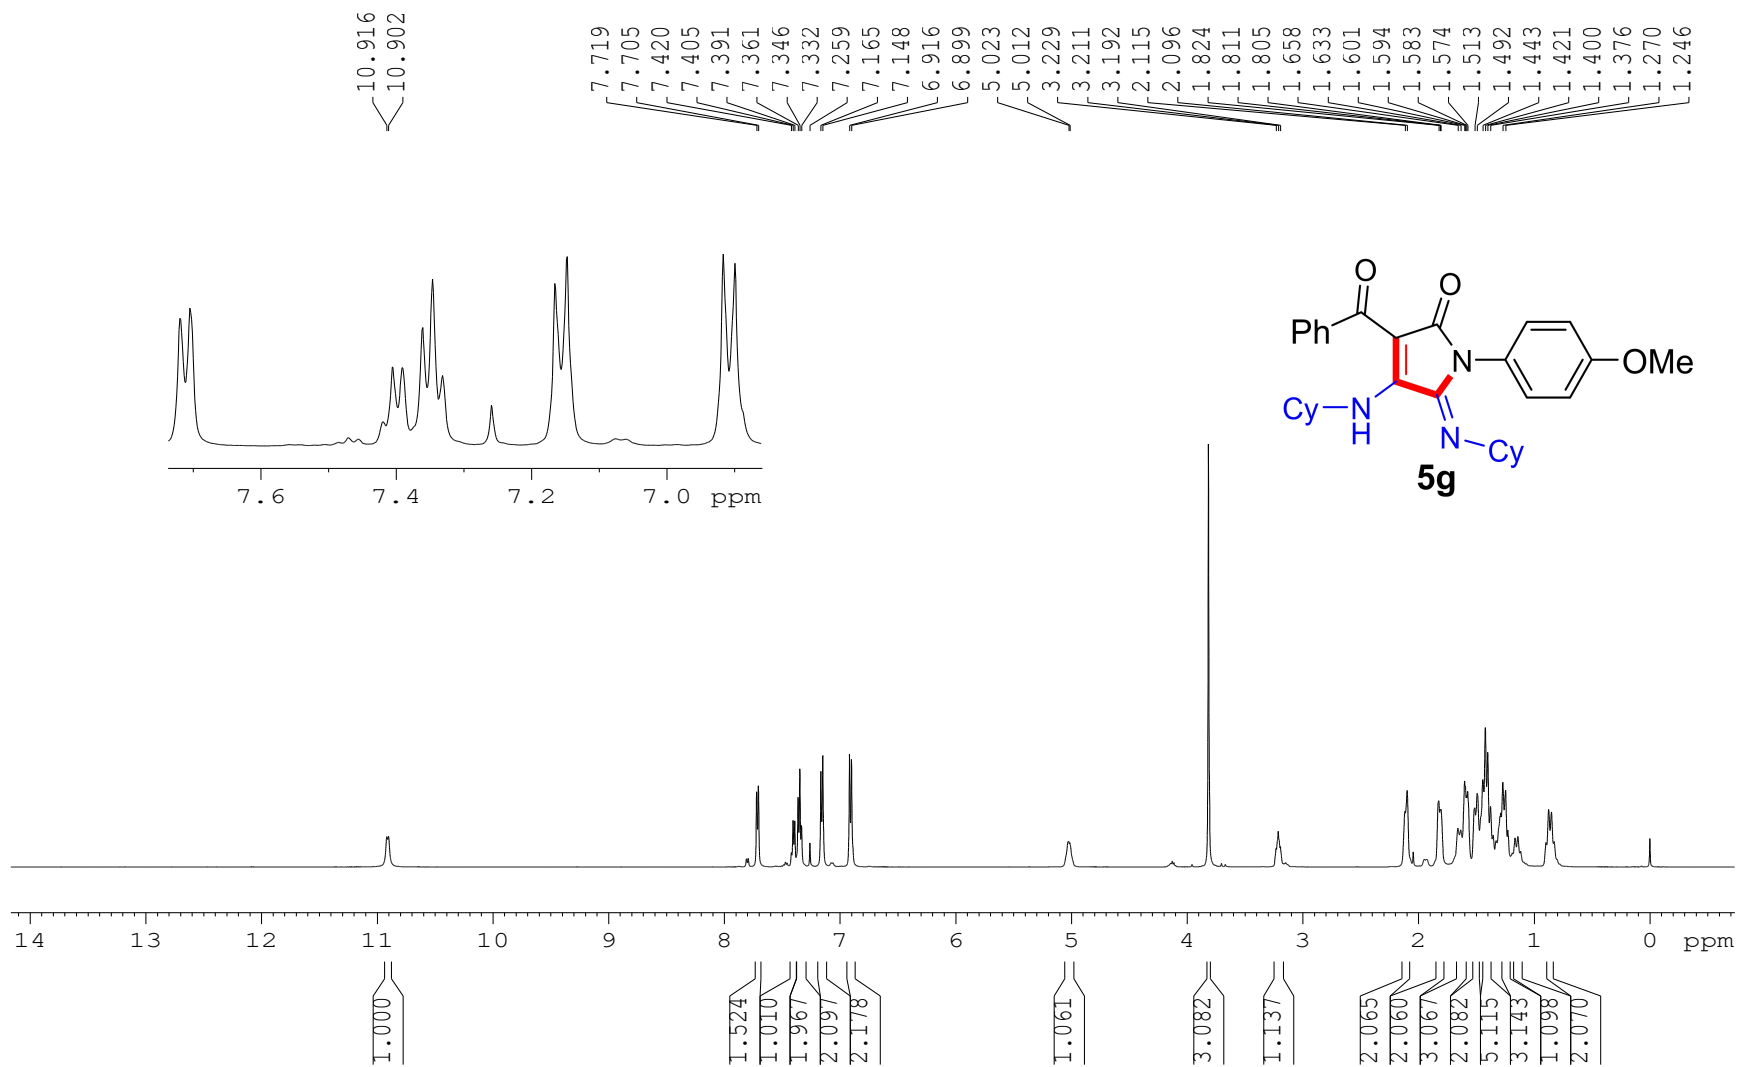

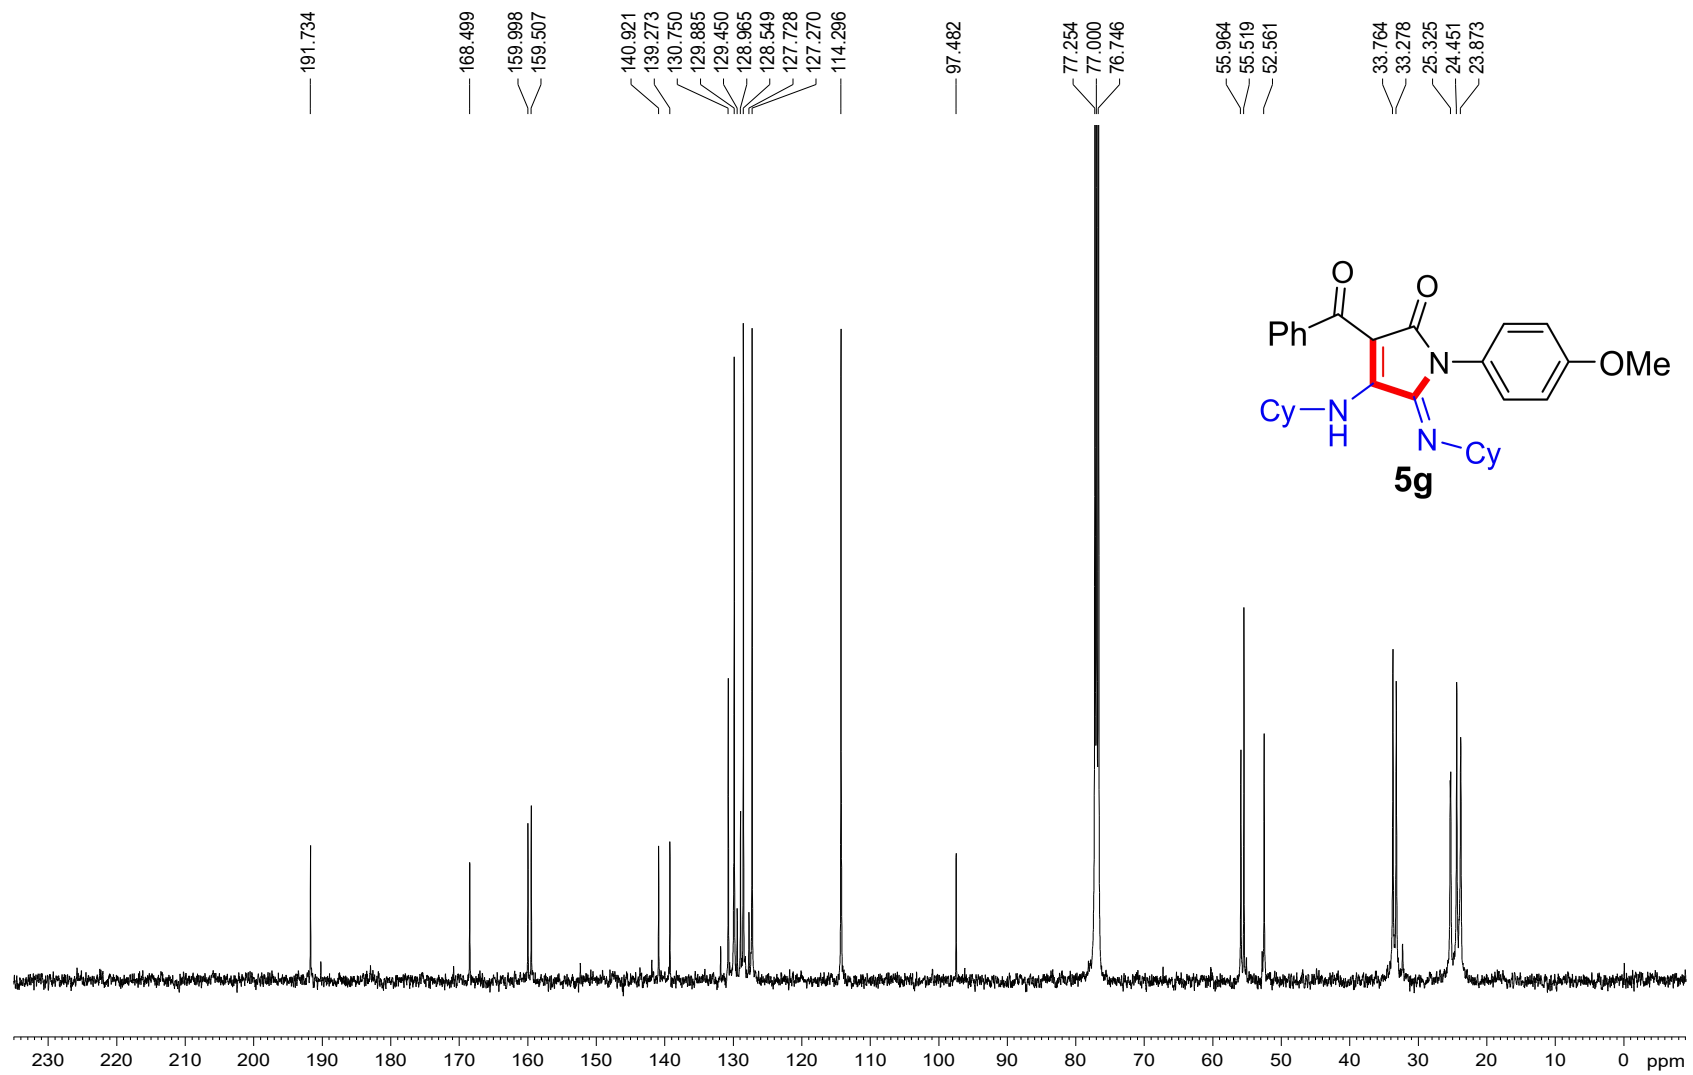

10.891  
7.801  
7.786  
7.698  
7.683  
7.538  
7.521  
7.487  
7.472  
7.435  
7.421  
7.406  
7.373  
7.358  
7.343  
7.258  
7.141  
7.125  
5.008  
5.002  
4.991  
3.192  
3.174  
3.156  
3.116  
2.109  
2.091  
1.940  
1.921  
1.832  
1.815  
1.809  
1.661  
1.623  
1.615  
1.513  
1.486  
1.449  
1.424  
1.403  
1.377  
1.354  
1.313  
1.295  
1.272  
1.253  
1.211  
1.188  
1.164  
1.140  
1.108  
0.920  
0.896  
0.872  
0.849  
-0.001

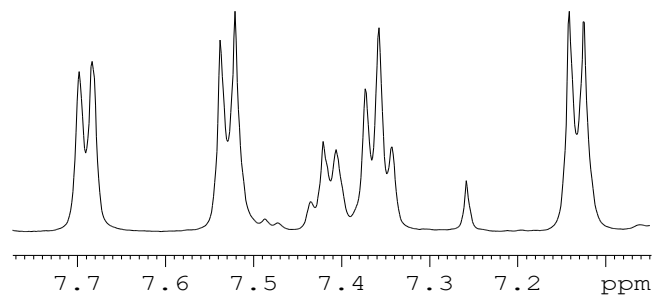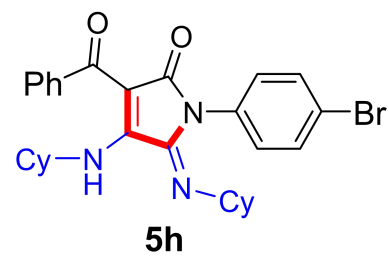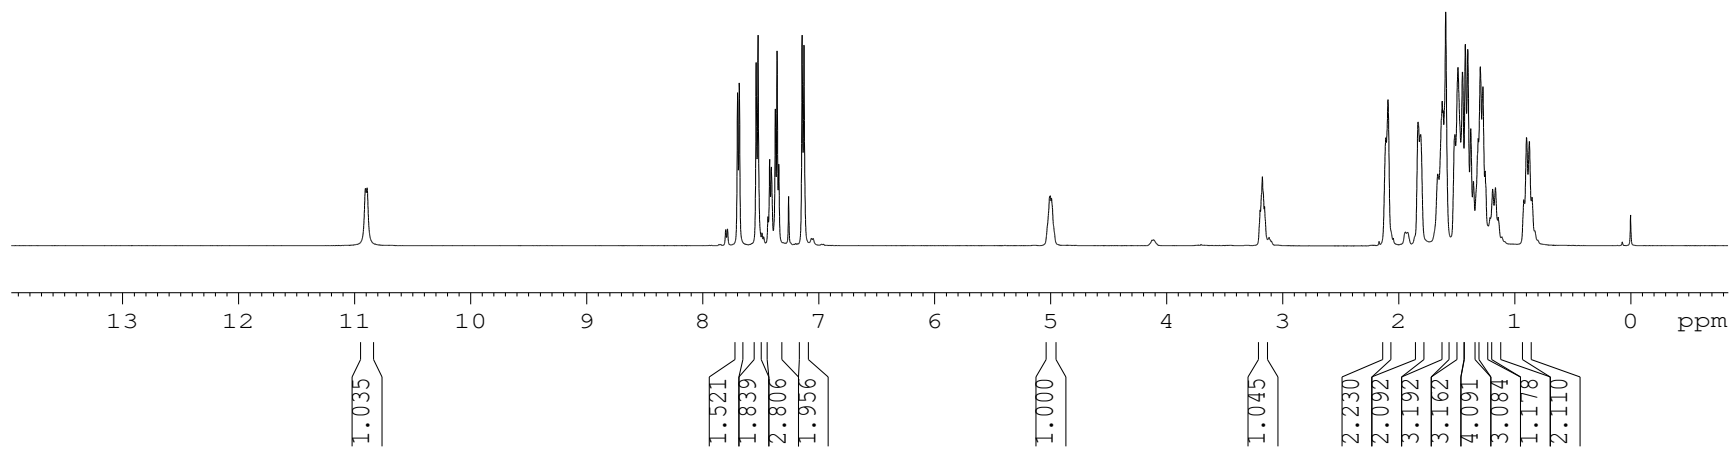

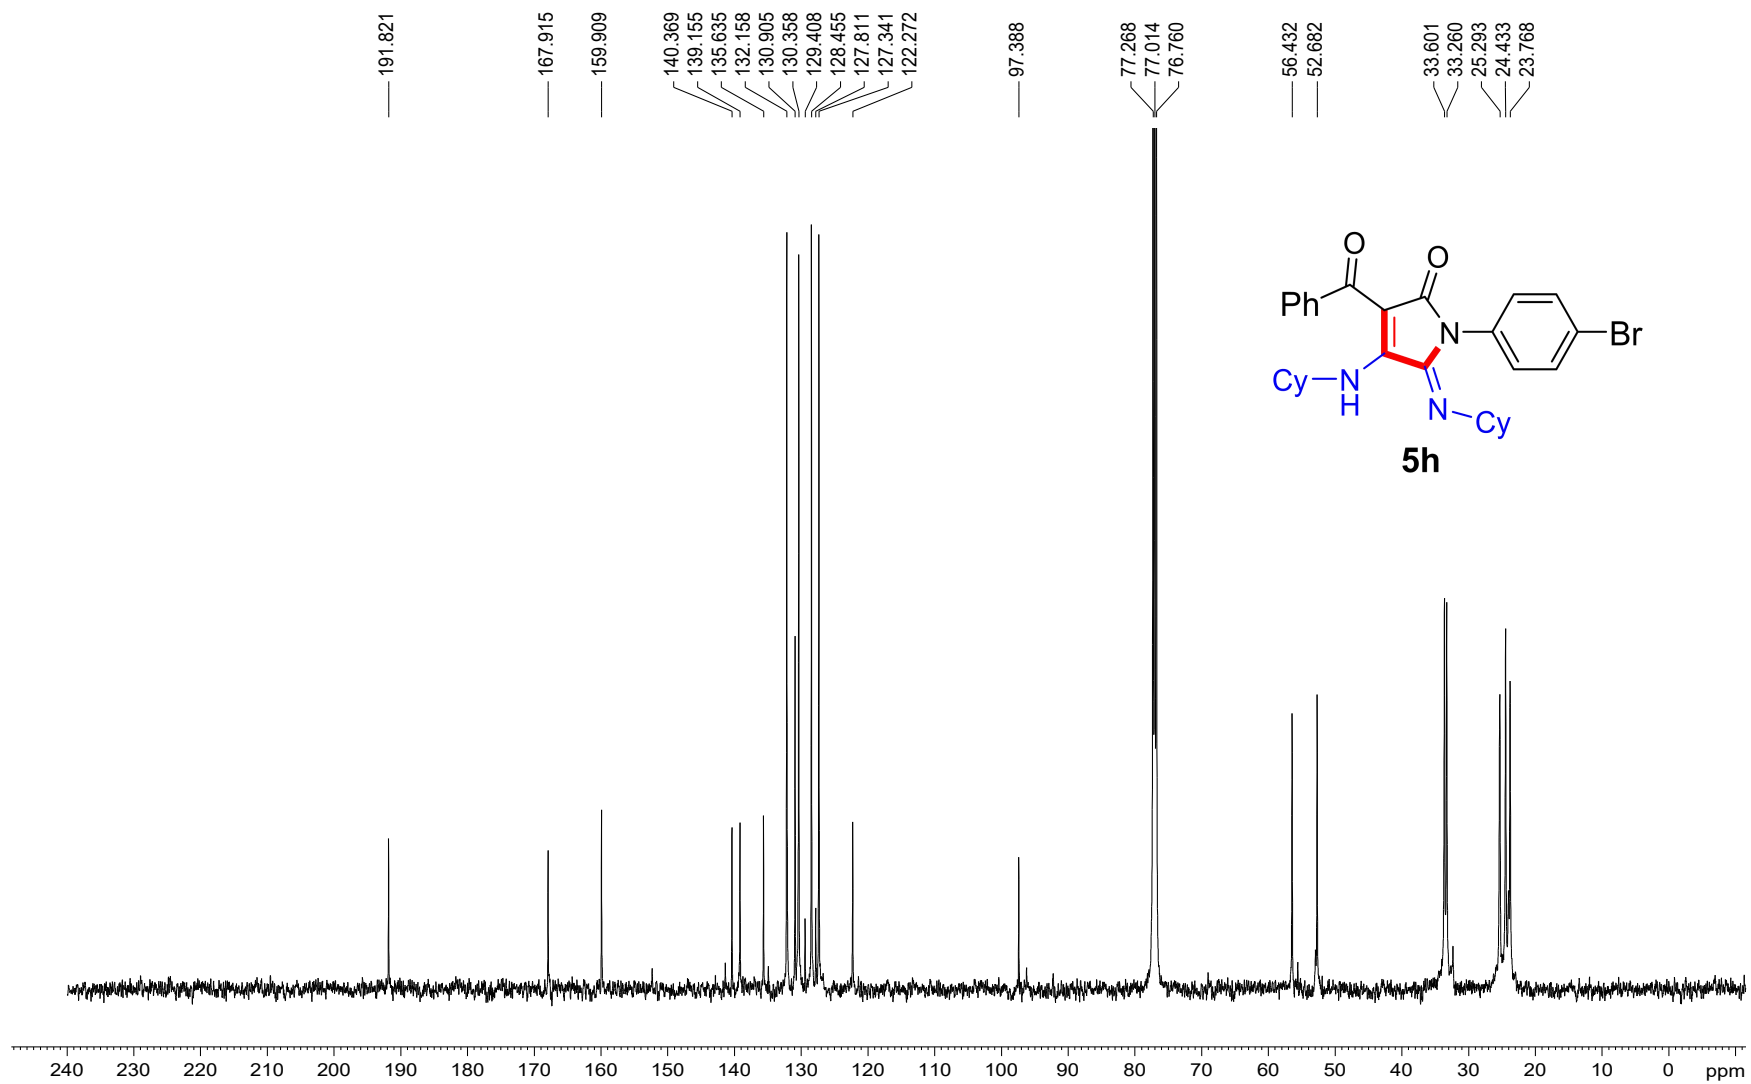

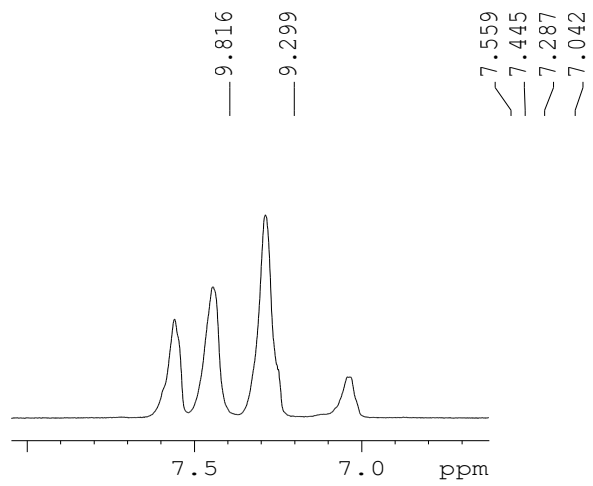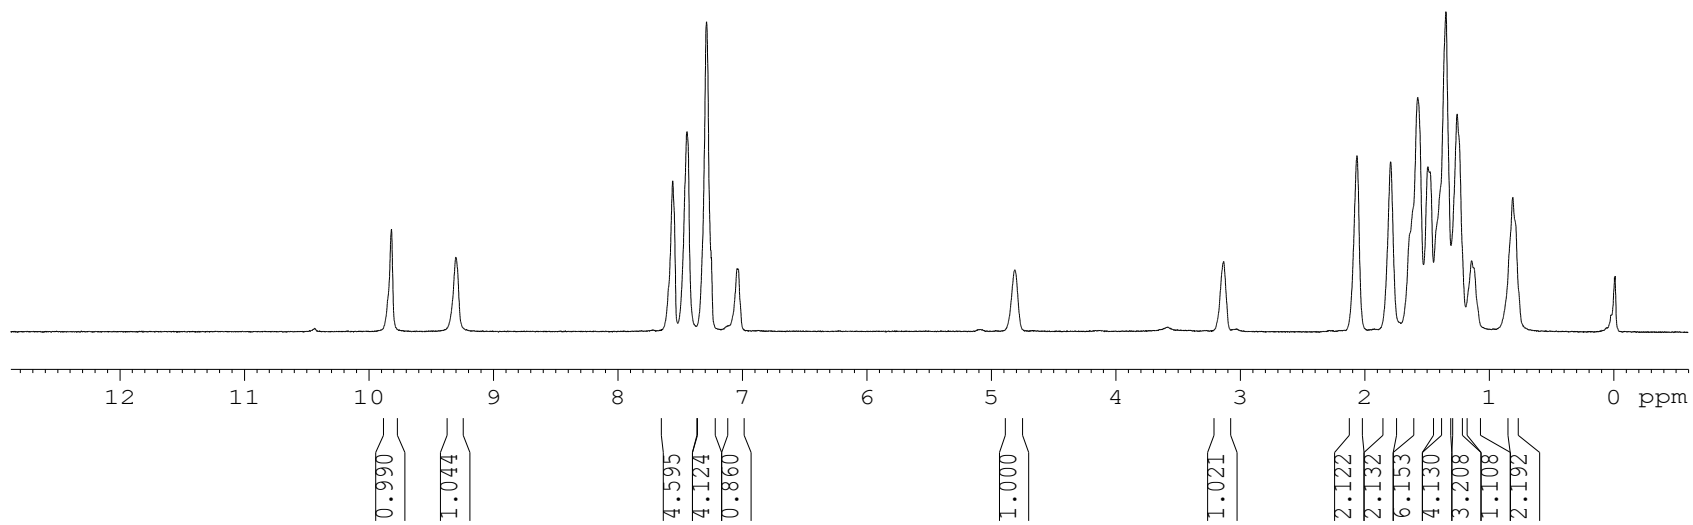

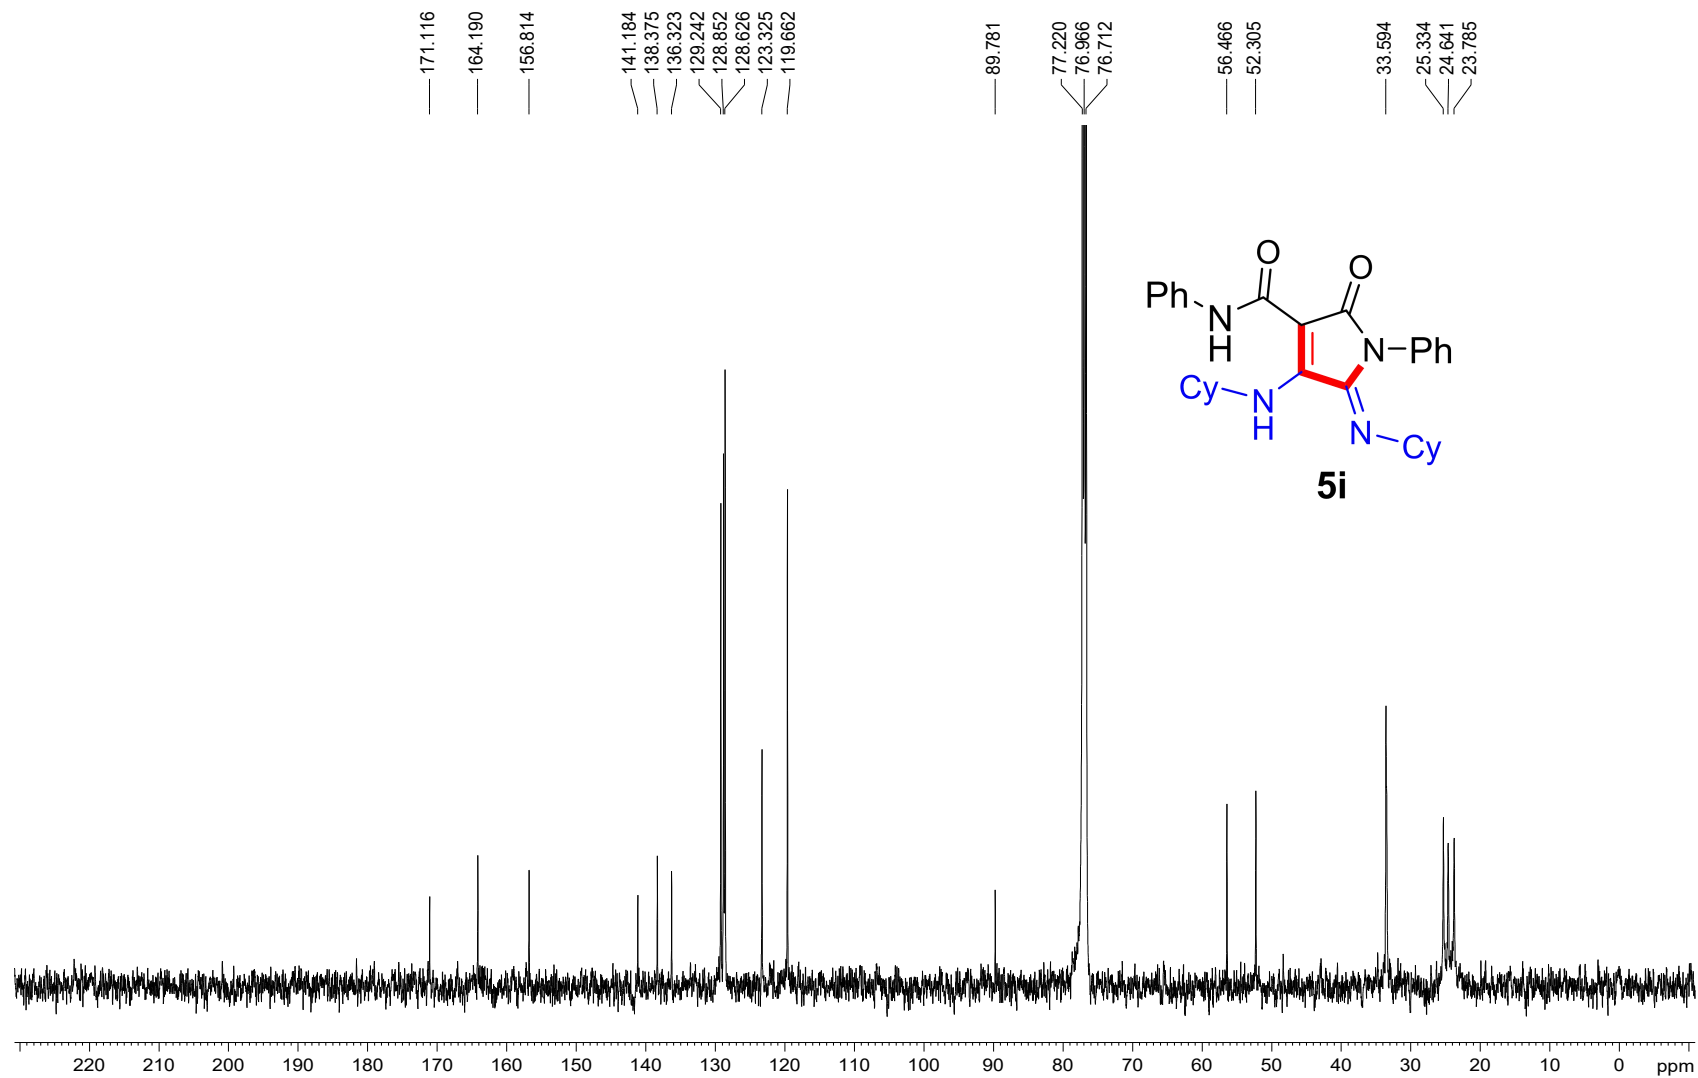

Supplement: d1ob00139f1.pdf [file d1ob00139f1.pdf]
